# Supplementary material for: Hydrophosphorylation of electron-deficient alkenes and alkynes mediated by convergent paired electrolysis
Source: Royal Society of Chemistry journal article supplement (doi:10.1039/d2cc02745c), 2022-01-01

**Hydrophosphorylation of Electron-Deficient Alkenes and Alkynes Mediated by Convergent Paired  
Electrolysis**

Xue Sun,<sup>&,a</sup> Jianjing, Yang,<sup>&,a</sup> Kelu Yan,<sup>a</sup> Xinyu Zhuang,<sup>a</sup> Jie Yu,<sup>a</sup> Xiaodan Song,<sup>a</sup> Fanjun Zhang,<sup>a</sup> Bingwen Li,<sup>\*,b</sup> and Jiangwei Wen<sup>\*a</sup>

<sup>a</sup> Institute of Medicine and Materials Applied Technologies, College of Chemistry and Chemical Engineering, Qufu Normal University, Qufu, Shandong 273165, China.

<sup>b</sup> Shandong Key Laboratory of Biophysics, Institute of Biophysics, Dezhou University, Dezhou, 253023, China.

<sup>&</sup> X. Sun and J. Yang contributed equally to this work.

\*Corresponding author: [wenjy@qfnu.edu.cn](mailto:wenjy@qfnu.edu.cn), [libingwen0609@163.com](mailto:libingwen0609@163.com)

## 1. General information

All glassware was oven dried at 100 °C for hours and cooled down under vacuum. Diarylphosphane oxides and deuterated diphenylphosphane were synthesized according to previous reports.<sup>1</sup> Unless otherwise noted, materials were obtained from commercial suppliers and used without further purification. The instrument for electrolysis is dual display potentiostat (DJS-292B) (made in China), the carbon rod ( $\phi = 6.0$  mm), Pt plates (1.0 x 1.0 cm<sup>2</sup>), and Ni plates (1.5 x 1.5 cm<sup>2</sup>) was purchased from Xuzhou Xinke Instrument and Meter Co. LTD. Thin layer chromatography (TLC) employed glass 0.25 mm silica gel plates. Flash chromatography columns were packed with 200-300 mesh silica gel in petroleum (b. p. 60-90 °C). <sup>1</sup>H, <sup>13</sup>C NMR, and <sup>19</sup>F NMR data were recorded with Bruker Advance III (500 MHz) spectrometers with tetramethylsilane as an internal standard. All chemical shifts ( $\delta$ ) are reported in ppm and coupling constants ( $J$ ) in Hz. All chemical shifts are reported relative to tetramethylsilane and d-solvent peaks (77.00 ppm, chloroform), respectively.

## 2. General Procedure

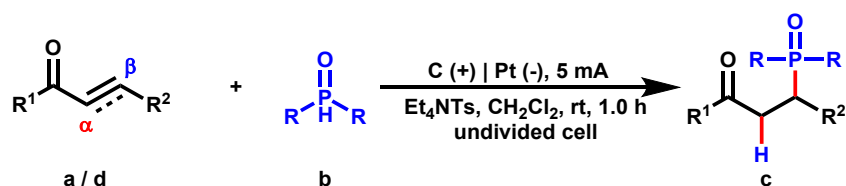

In an oven-dried undivided three-necked flask (25 mL) equipped with a stir bar, **a/d** (0.25 mmol), **b** (0.5 mmol), and Et<sub>4</sub>N<sup>+</sup>Ts<sup>-</sup> (0.5 mmol, 142.5 mg) were combined and added. The flask was equipped with a carbon rods ( $\phi = 6.0$  mm) as the anode and Pt plates (1.0 x 1.0 cm<sup>2</sup>) as the cathode and was then charged with nitrogen. Under the protection of nitrogen, CH<sub>2</sub>Cl<sub>2</sub> (10.0 mL) was slowly injected into the reaction flask. The reaction mixture was stirred and electrolyzed at a constant current of 5 mA under 25 °C for 1.0 h. When the reaction was finished, the reaction mixture was washed with water and extracted with CH<sub>2</sub>Cl<sub>2</sub> (10 mL x 3). The organic layers were combined, dried over Na<sub>2</sub>SO<sub>4</sub>, and concentrated. The pure product **c** was obtained by flash column chromatography on silica gel.

### 3. Optimization of reaction conditions

**Table S1.** Optimization of reaction conditions <sup>a</sup>

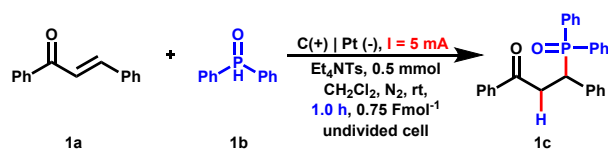

| Entry | Deviation from standard conditions                                                  | Yield <sup>b</sup> (%) |
|-------|-------------------------------------------------------------------------------------|------------------------|
| 1     | none                                                                                | 94                     |
| 2     | without electricity                                                                 | n. d.                  |
| 3     | <sup>n</sup> Bu <sub>4</sub> NOAc instead of Et <sub>4</sub> NTs                    | trace                  |
| 4     | <sup>n</sup> Bu <sub>4</sub> NBF <sub>4</sub> instead of Et <sub>4</sub> NTs        | 20                     |
| 5     | <sup>n</sup> Bu <sub>4</sub> NClO <sub>4</sub> instead of Et <sub>4</sub> NTs       | 80                     |
| 6     | <sup>n</sup> Bu <sub>4</sub> NNO <sub>3</sub> instead of Et <sub>4</sub> NTs        | 78                     |
| 7     | Et <sub>4</sub> NBr, <sup>n</sup> Bu <sub>4</sub> Ni instead of Et <sub>4</sub> NTs | n. d.                  |
| 8     | DCE, DMF instead of CH <sub>2</sub> Cl <sub>2</sub>                                 | 60, 45                 |
| 9     | CH <sub>3</sub> CN instead of CH <sub>2</sub> Cl <sub>2</sub>                       | trace                  |
| 10    | C(+) C(-)                                                                           | 75                     |
| 11    | Pt(+) C(-)                                                                          | 70                     |
| 12    | C(+) Ni(-)                                                                          | 25                     |
| 13    | 3 mA, 100 min                                                                       | 40                     |
| 14    | 10 mA, 30 min                                                                       | 85                     |

<sup>a</sup> Standard conditions: carbon rods as the anode, Pt plates (1 x 1 cm<sup>2</sup>) as the cathode, constant current = 5 mA, **1a** (0.25 mmol), **1b** (0.5 mmol), Et<sub>4</sub>NTs (0.5 mmol), CH<sub>2</sub>Cl<sub>2</sub> (10.0 mL), rt, N<sub>2</sub>, 1.0 h, 0.75 Fmol<sup>-1</sup>. n. d. = not detected. DCE = 1,2-dichloroethane, DMF = N,N-dimethylacetamide. <sup>b</sup> Isolated yields.

### 4. Mechanistic Studies

#### 4.1 Cyclic Voltammetry Experiment

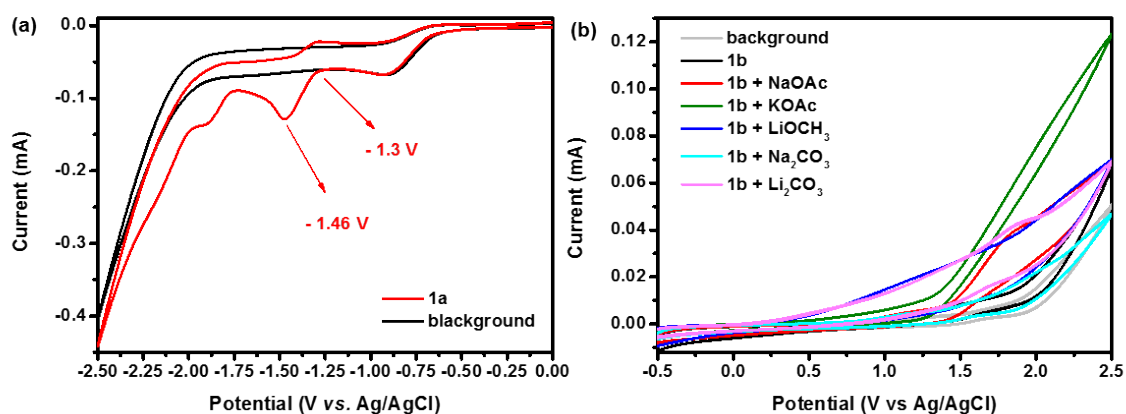

**Figure S1.** Cyclic Voltammetry at glass carbon as the working electrode, Pt plates (1.5 × 1.5 cm<sup>2</sup>) as the counter electrode, Ag/AgCl as reference electrode. (a) **1a** (0.25 mM), in CH<sub>2</sub>Cl<sub>2</sub> (10.0 mL) containing 0.1 M <sup>n</sup>Bu<sub>4</sub>NBF<sub>4</sub>. (b) **1b** (0.5 mM). Base (2 mM) in CH<sub>2</sub>Cl<sub>2</sub>/EtOH (10.0 mL, v/v = 9/1) containing 0.1 M <sup>n</sup>Bu<sub>4</sub>NBF<sub>4</sub>.

## 4.2 Deuterium Experiment

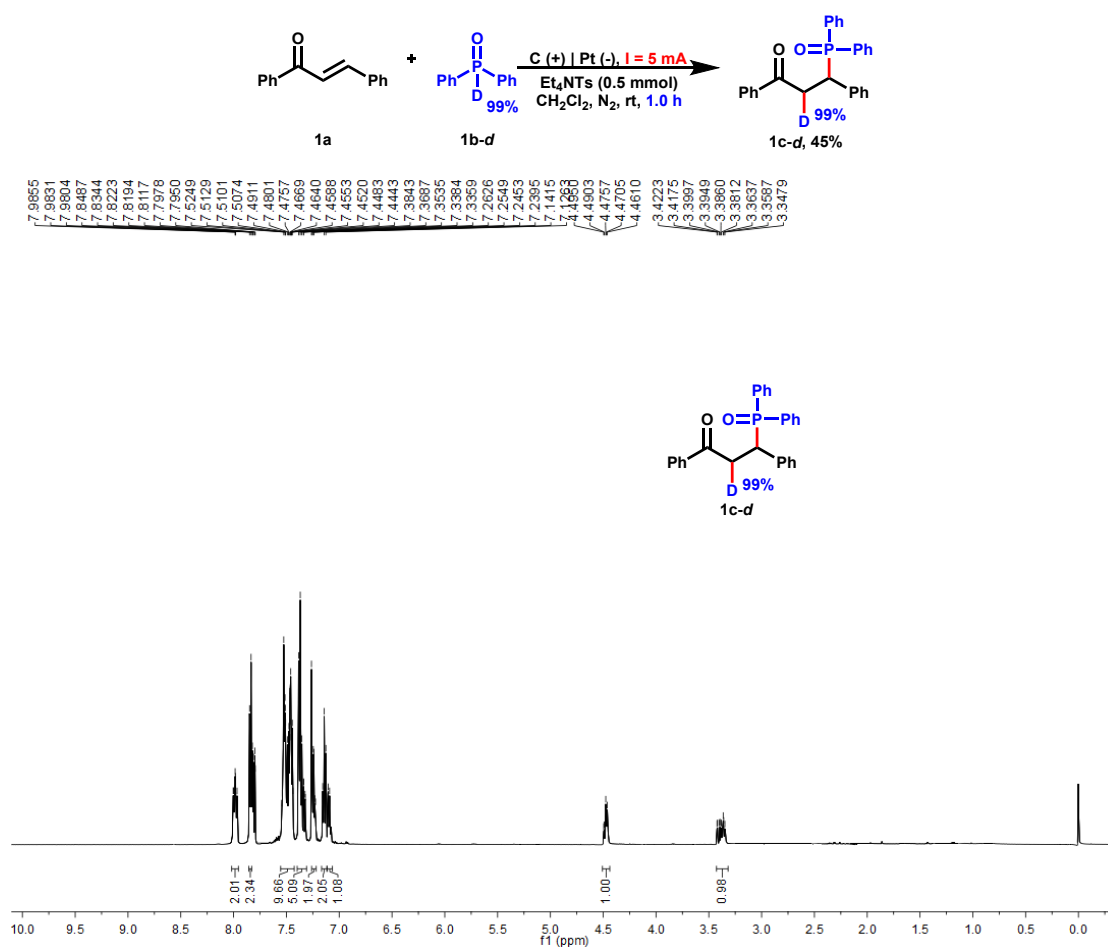

**Figure S2.**  $^1\text{H}$  NMR results of **1c-d**.

In an oven-dried undivided three-necked flask (25 mL) equipped with a stir bar, **1a** (0.25 mmol, 52.0 mg), **1b-d** (0.5 mmol, 101.5 mg), and Et<sub>4</sub>NTs (0.5 mmol, 142.5 mg) were combined and added. The flask was equipped with a carbon rods ( $\phi = 6.0$  mm) as the anode and Pt plates (1.0 x 1.0 cm<sup>2</sup>) as the cathode and was then charged with nitrogen. Under the protection of nitrogen, CH<sub>2</sub>Cl<sub>2</sub> (10.0 mL) was slowly injected into the reaction flask. The reaction mixture was stirred and electrolyzed at a constant current of 5 mA under 25 °C for 1.0 h. When the reaction was finished, the pure product **1c-d** was obtained by flash column chromatography on silica gel with a yield of 45%.

## 4.3 Radical trapping experiments

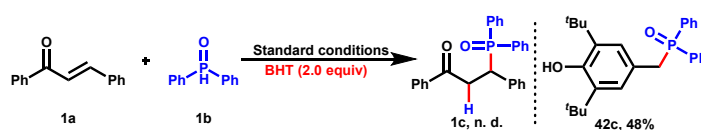

In an oven-dried undivided three-necked flask (25 mL) equipped with a stir bar, **1a** (0.25 mmol, 52.0 mg), **1b** (0.5 mmol, 101.0 mg), BHT (0.5 mmol, 110.0 mg), and Et<sub>4</sub>NTs (0.5 mmol, 142.5 mg) were

combined and added. The flask was equipped with a carbon rods ( $\phi = 6.0$  mm) as the anode and Pt plates ( $1.0 \times 1.0$  cm<sup>2</sup>) as the cathode and was then charged with nitrogen. Under the protection of nitrogen, CH<sub>2</sub>Cl<sub>2</sub> (10.0 mL) was slowly injected into the reaction flask. The reaction mixture was stirred and electrolyzed at a constant current of 5 mA under 25 °C for 1.0 h. When the reaction was finished, the solution was concentrated in a vacuum and not detected the desired product **1c**. The compound **42c** can be isolated in a yield of 48%.

#### 4.4 HRMS results of **1d** and **1b** under standard conditions for 30 min (Figure S2 – S5).

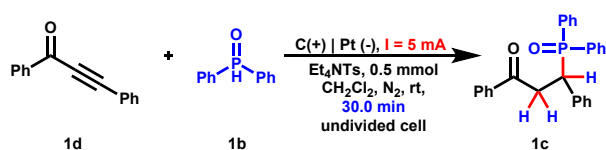

In an oven-dried undivided three-necked flask (25 mL) equipped with a stir bar, **1d** (0.25 mmol, 51.5 mg), **1b** (0.5 mmol, 101.0 mg), and Et<sub>4</sub>NTs (0.5 mmol, 142.5 mg) were combined and added. The flask was equipped with a carbon rods ( $\phi = 6.0$  mm) as the anode and Pt plates ( $1.0 \times 1.0$  cm<sup>2</sup>) as the cathode and was then charged with nitrogen. Under the protection of nitrogen, CH<sub>2</sub>Cl<sub>2</sub> (10.0 mL) was slowly injected into the reaction flask. The reaction mixture was stirred and electrolyzed at a constant current of 5 mA under 25 °C for 30.0 min, and the corresponding composition was monitored by HRMS.

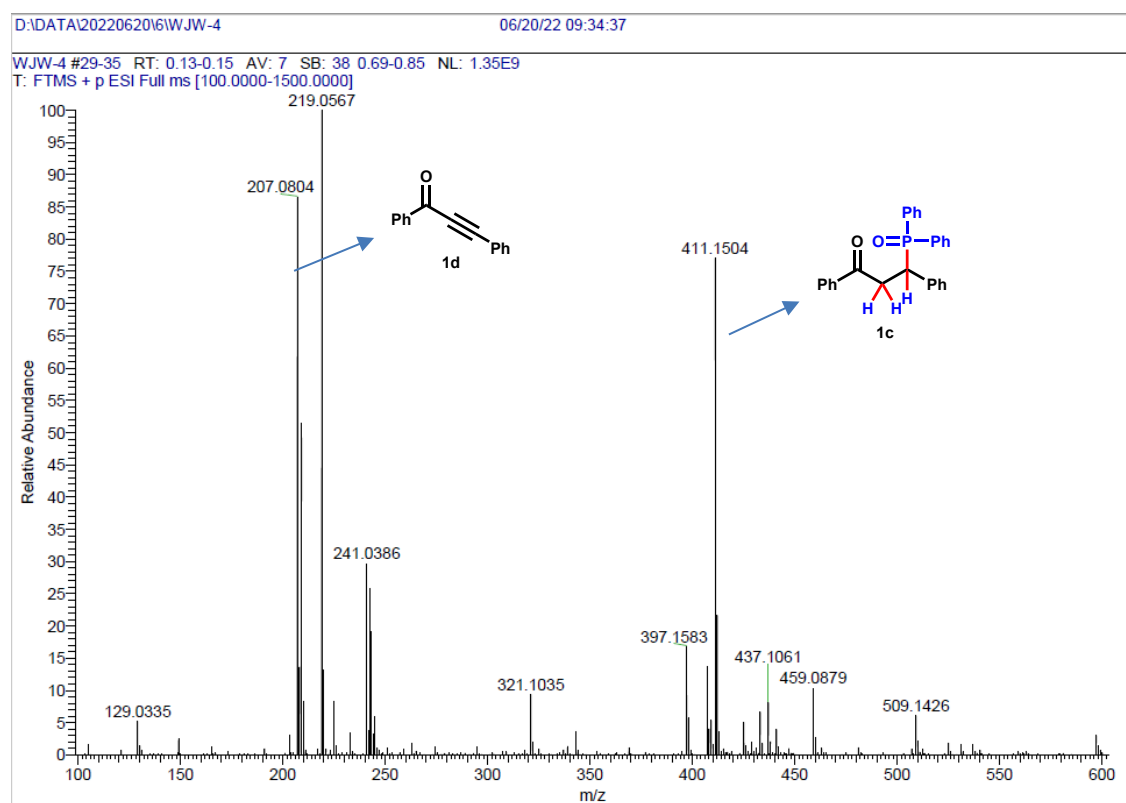

**Figure S3.** HRMS results of **1d** and **1b** under standard conditions for 30 min.

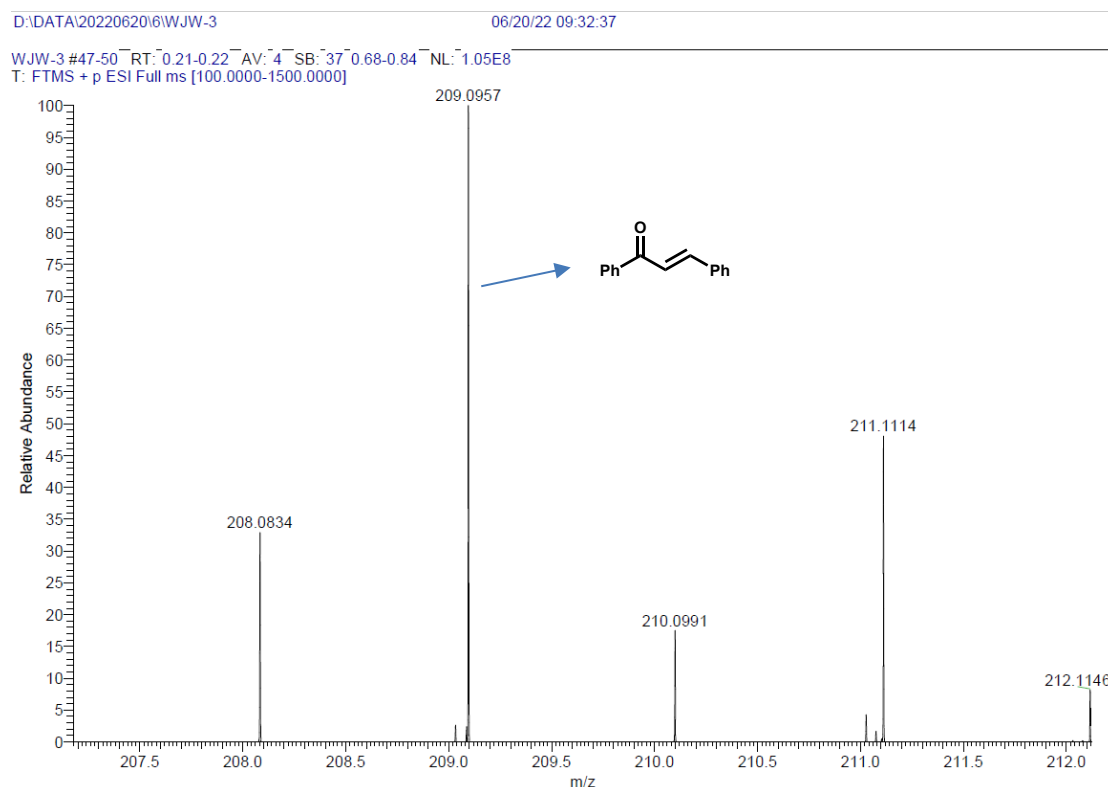

**Figure S4.** Zoomed in HRMS results of **1a**.

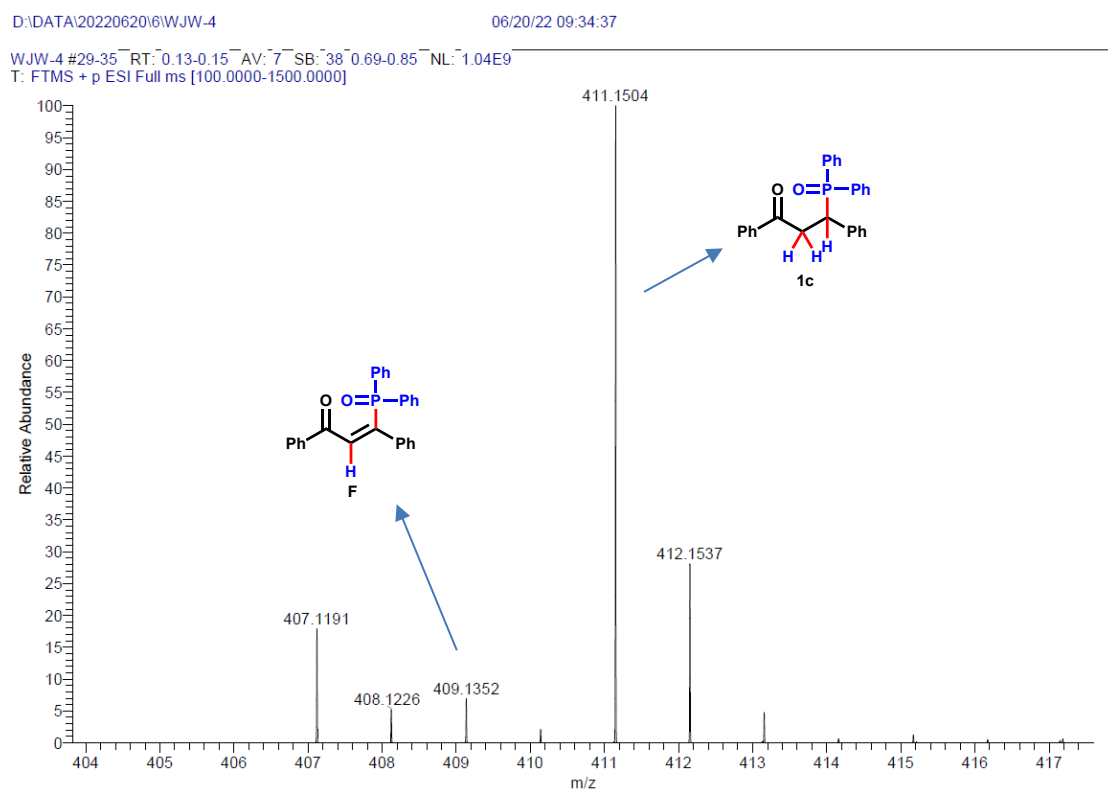

**Figure S5.** Zoomed in HRMS results of **1c** and byproduct **F** (trace).



## 5. References

1. a) C.-J. Li, J. Lü, Z.-X. Zhang, K. Zhou, Y. Li, G.-H. Qi, *Res. Chem. Intermed.* **2018**, 44, 4547-4562; b) H.-F. Qian, C.-K. Li, Z.-H. Zhou, Z.-K. Tao, A. Shoberu, J.-P. Zou, *Org. Lett.* **2018**, 20, 18, 5947-5951.
2. a) C. Shan, F. Chen, J. Pan, Y. Gao, P. Xu, Y. Zhao, *J. Org. Chem.* **2017**, 82, 11659-11666; b) Z. Jiang, Y. Zhang, W. Ye, C.-H. Tan, *Tetrahedron Letters* **2007**, 48, 51-54; c) S. Liu, N. Shao, F.-Z. Li, X.-C. Yang, M.-C. Wang, *Org. Biomol. Chem.*, **2017**, 15, 9465-9474; d) H. K. Lenker, M. E. Richard, K. P. Reese, A. F. Carter, J. D. Zawisky, E. F. Winter, T. W. Bergeron, K. S. Guydon, R.A. Stockland, Jr. *J. Org. Chem.* **2012**, 77, 1378-1385; e) A. Russo, A. Lattanzi, *Eur. J. Org. Chem.* **2010**, 6736-6739; f) Z. Huang, W. Liu, S. Li, Y. Yang, S. Guo, H. Cai, *Synlett* **2020**, 31, 1295-1297.

## 6. Detail descriptions for products.

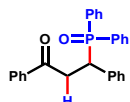

**3-(diphenylphosphoryl)-1,3-diphenylpropan-1-one (1c):**<sup>2</sup> white solid was obtained by column chromatography (eluent: EtOAc/petroleum ether = 1/2) with 94% isolated yield (96.4 mg). <sup>1</sup>H NMR (500 MHz, CDCl<sub>3</sub>) δ 8.01 – 7.95 (m, 2H), 7.84 (d, *J* = 7.7 Hz, 2H), 7.53 – 7.44 (m, 6H), 7.40 – 7.35 (m, 4H), 7.33 (d, *J* = 7.4 Hz, 1H), 7.24 (dd, *J* = 7.9, 2.8 Hz, 2H), 7.14 (t, *J* = 7.4 Hz, 2H), 7.10 (d, *J* = 7.2 Hz, 1H), 4.50 – 4.43 (m, 1H), 4.06 – 3.98 (m, 1H), 3.43 – 3.35 (m, 1H). <sup>13</sup>C NMR (126 MHz, CDCl<sub>3</sub>) δ 196.6 (d, *J*<sub>C-P</sub> = 13.3 Hz), 136.4, 135.9 (d, *J*<sub>C-P</sub> = 5.6 Hz), 133.3, 132.0 (d, *J*<sub>C-P</sub> = 2.7 Hz), 131.5 (d, *J*<sub>C-P</sub> = 100.7 Hz), 131.4 (d, *J*<sub>C-P</sub> = 2.8 Hz), 131.3 (d, *J*<sub>C-P</sub> = 8.5 Hz), 131.2 (d, *J*<sub>C-P</sub> = 94.9 Hz), 130.9 (d, *J*<sub>C-P</sub> = 8.9 Hz), 129.8 (d, *J*<sub>C-P</sub> = 5.7 Hz), 128.9 (d, *J*<sub>C-P</sub> = 11.3 Hz), 128.5, 128.3 (d, *J*<sub>C-P</sub> = 1.8 Hz), 128.1, 128.0, 127.0 (d, *J*<sub>C-P</sub> = 2.3 Hz), 41.0 (d, *J*<sub>C-P</sub> = 69.2 Hz), 38.9. <sup>31</sup>P NMR (202 MHz, CDCl<sub>3</sub>) δ 34.4.

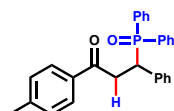

**3-(diphenylphosphoryl)-3-phenyl-1-(p-tolyl)propan-1-one (2c):**<sup>2</sup> white solid was obtained by column chromatography (eluent: EtOAc/petroleum ether = 1/2) with 82% isolated yield (87.0 mg). <sup>1</sup>H NMR (500 MHz, CDCl<sub>3</sub>) δ 7.97 – 7.89 (m, 2H), 7.58 – 7.50 (m, 3H), 7.46 – 7.40 (m, 2H), 7.35 – 7.27 (m, 3H), 7.25 – 7.20 (m, 2H), 7.18 – 7.11 (m, 3H), 4.25 – 4.19 (m, 1H), 3.38 – 3.28 (m, 1H), 3.00 – 2.89 (m, 1H), 1.95 (s, 3H). <sup>13</sup>C NMR (126 MHz, CDCl<sub>3</sub>) δ 196.2 (d, *J*<sub>C-P</sub> = 13.3 Hz), 144.2, 135.9 (d, *J*<sub>C-P</sub> = 5.6 Hz), 133.9, 132.0 (d, *J*<sub>C-P</sub> = 2.6 Hz), 131.9 (d, *J*<sub>C-P</sub> = 100.5 Hz), 131.4 (d, *J*<sub>C-P</sub> = 94.5 Hz), 131.3 (d, *J*<sub>C-P</sub> = 2.7 Hz),



131.3 (d,  $J_{C-P} = 8.5$  Hz), 130.9 (d,  $J_{C-P} = 8.9$  Hz), 129.8 (d,  $J_{C-P} = 5.7$  Hz), 129.2, 128.9 (d,  $J_{C-P} = 11.2$  Hz), 128.2 (d,  $J_{C-P} = 1.8$  Hz), 128.2, 128.0 (d,  $J_{C-P} = 11.8$  Hz), 127.0 (d,  $J_{C-P} = 2.4$  Hz), 41.0 (d,  $J_{C-P} = 69.1$  Hz), 38.8, 21.6.  $^{31}\text{P}$  NMR (202 MHz,  $\text{CDCl}_3$ )  $\delta$  34.4.

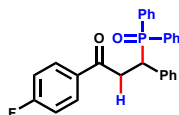

**3-(diphenylphosphoryl)-1-(4-fluorophenyl)-3-phenylpropan-1-one (3c):**<sup>2</sup> white solid was obtained by column chromatography (eluent: EtOAc/petroleum ether = 1/1) with 73% isolated yield (78.1 mg).  $^1\text{H}$  NMR (500 MHz,  $\text{CDCl}_3$ )  $\delta$  7.94 – 7.87 (m, 2H), 7.81 – 7.74 (m, 2H), 7.45 – 7.36 (m, 5H), 7.32 – 7.28 (m, 2H), 7.27 – 7.22 (m, 1H), 7.18 – 7.12 (m, 2H), 7.08 – 7.04 (m, 2H), 7.03 – 6.98 (m, 1H), 6.97 – 6.91 (m, 2H), 4.41 – 4.34 (m, 1H), 3.94 – 3.85 (m, 1H), 3.34 – 3.24 (m, 1H).  $^{13}\text{C}$  NMR (126 MHz,  $\text{CDCl}_3$ )  $\delta$  195.1 (d,  $J_{C-P} = 13.2$  Hz), 165.8 (d,  $J_{C-F} = 255.4$  Hz), 132.8 (d,  $J_{C-P} = 2.4$  Hz), 132.0 (d,  $J_{C-P} = 2.6$  Hz), 131.5 (d,  $J_{C-P} = 100.7$  Hz), 131.4 (d,  $J_{C-P} = 97.0$  Hz), 131.4 (d,  $J_{C-P} = 2.7$  Hz), 131.3 (d,  $J_{C-P} = 8.5$  Hz), 130.9 (d,  $J_{C-P} = 8.9$  Hz), 130.7 (d,  $J_{C-P} = 9.4$  Hz), 129.8 (d,  $J_{C-P} = 5.7$  Hz), 128.9 (d,  $J_{C-P} = 11.2$  Hz), 128.3 (d,  $J_{C-P} = 1.7$  Hz), 128.0 (d,  $J_{C-P} = 11.8$  Hz), 127.1 (d,  $J_{C-P} = 2.3$  Hz), 115.6 (d,  $J_{C-F} = 21.9$  Hz), 41.1 (d,  $J_{C-P} = 69.0$  Hz), 38.9.  $^{31}\text{P}$  NMR (202 MHz,  $\text{CDCl}_3$ )  $\delta$  34.3.

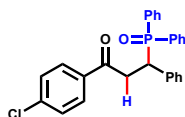

**1-(4-chlorophenyl)-3-(diphenylphosphoryl)-3-phenylpropan-1-one (4c):**<sup>2</sup> white solid was obtained by column chromatography (eluent: EtOAc/petroleum ether = 1/2) with 62% isolated yield (68.8 mg).  $^1\text{H}$  NMR (500 MHz,  $\text{CDCl}_3$ )  $\delta$  8.03 – 7.94 (m, 2H), 7.79 – 7.74 (m, 2H), 7.55 – 7.49 (m, 3H), 7.48 – 7.43 (m, 2H), 7.38 – 7.31 (m, 5H), 7.27 – 7.22 (m, 2H), 7.17 – 7.12 (m, 2H), 7.12 – 7.07 (m, 1H), 4.48 – 4.40 (m, 1H), 4.01 – 3.90 (m, 1H), 3.41 – 3.31 (m, 1H).  $^{13}\text{C}$  NMR (126 MHz,  $\text{CDCl}_3$ )  $\delta$  195.6 (d,  $J_{C-P} = 13.2$  Hz), 139.8, 135.8 (d,  $J_{C-P} = 5.5$  Hz), 134.7, 132.0 (d,  $J_{C-P} = 2.6$  Hz), 131.5 (d,  $J_{C-P} = 100.6$  Hz), 131.4 (d,  $J_{C-P} = 2.7$  Hz), 131.3 (d,  $J_{C-P} = 8.5$  Hz), 131.2 (d,  $J_{C-P} = 94.5$  Hz), 130.9 (d,  $J_{C-P} = 8.9$  Hz), 129.7 (d,  $J_{C-P} = 5.6$  Hz), 129.5, 128.9 (d,  $J_{C-P} = 11.3$  Hz), 128.8, 128.3 (d,  $J_{C-P} = 1.8$  Hz), 128.0 (d,  $J_{C-P} = 11.8$  Hz), 127.1 (d,  $J_{C-P} = 2.4$  Hz), 41.1 (d,  $J_{C-P} = 68.9$  Hz), 38.9.  $^{31}\text{P}$  NMR (202 MHz,  $\text{CDCl}_3$ )  $\delta$  34.3.

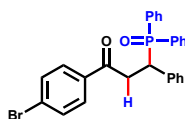

**1-(4-bromophenyl)-3-(diphenylphosphoryl)-3-phenylpropan-1-one (5c):**<sup>2</sup> white solid was obtained by column chromatography (eluent: EtOAc/petroleum ether = 1/2) with 61% isolated yield (74.4 mg).

$^1\text{H}$  NMR (500 MHz,  $\text{CDCl}_3$ )  $\delta$  8.00 – 7.94 (m, 2H), 7.70 – 7.67 (m, 2H), 7.54 – 7.49 (m, 5H), 7.47 – 7.43 (m, 2H), 7.35 (t,  $J = 5.8$  Hz, 3H), 7.26 – 7.21 (m, 2H), 7.14 (t,  $J = 7.1$  Hz, 2H), 7.12 – 7.08 (m, 1H), 4.46 – 4.39 (m, 1H), 3.99 – 3.91 (m, 1H), 3.39 – 3.31 (m, 1H).  $^{13}\text{C}$  NMR (126 MHz,  $\text{CDCl}_3$ )  $\delta$  195.8 (d,  $J_{C-P} = 13.2$  Hz), 135.7 (d,  $J_{C-P} = 5.7$  Hz), 135.1, 132.1 (d,  $J_{C-P} = 2.7$  Hz), 131.9 (d,  $J_{C-P} = 105.3$  Hz), 131.8 (d,  $J_{C-P} = 102.8$  Hz), 131.4 (d,  $J_{C-P} = 2.6$  Hz), 131.3 (d,  $J_{C-P} = 8.4$  Hz), 130.9 (d,  $J_{C-P} = 8.9$  Hz), 129.7 (d,  $J_{C-P} = 5.6$  Hz), 129.6, 128.9 (d,  $J_{C-P} = 11.2$  Hz), 128.6, 128.3 (d,  $J_{C-P} = 1.4$  Hz), 128.1 (d,  $J_{C-P} = 11.8$  Hz), 127.1 (d,  $J_{C-P} = 2.3$  Hz), 41.1 (d,  $J_{C-P} = 68.6$  Hz), 38.9.  $^{31}\text{P}$  NMR (202 MHz,  $\text{CDCl}_3$ )  $\delta$  34.4.

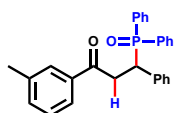

**3-(diphenylphosphoryl)-3-phenyl-1-(m-tolyl)propan-1-one (6c):**<sup>2</sup> white solid was obtained by column chromatography (eluent: EtOAc/petroleum ether = 1/1) with 68% isolated yield (72.1 mg).  $^1\text{H}$  NMR (500 MHz,  $\text{CDCl}_3$ )  $\delta$  8.03 – 7.95 (m, 2H), 7.67 – 7.62 (m, 2H), 7.54 – 7.49 (m, 3H), 7.48 – 7.43 (m, 2H), 7.41 – 7.36 (m, 2H), 7.35 – 7.28 (m, 2H), 7.27 – 7.21 (m, 3H), 7.16 – 7.11 (m, 2H), 7.11 – 7.06 (m, 1H), 4.51 – 4.44 (m, 1H), 4.07 – 3.98 (m, 1H), 3.42 – 3.32 (m, 1H), 2.33 (s, 3H).  $^{13}\text{C}$  NMR (126 MHz,  $\text{CDCl}_3$ )  $\delta$  196.7 (d,  $J_{C-P} = 13.3$  Hz), 138.3, 136.4, 135.9 (d,  $J_{C-P} = 5.6$  Hz), 134.0, 132.0 (d,  $J_{C-P} = 2.6$  Hz), 131.7 (d,  $J_{C-P} = 100.8$  Hz), 131.5 (d,  $J_{C-P} = 94.5$  Hz), 131.4 (d,  $J_{C-P} = 2.8$  Hz), 131.3 (d,  $J_{C-P} = 8.5$  Hz), 130.9 (d,  $J_{C-P} = 8.9$  Hz), 129.8 (d,  $J_{C-P} = 5.7$  Hz), 128.9 (d,  $J_{C-P} = 11.2$  Hz), 128.7, 128.4, 128.2 (d,  $J_{C-P} = 1.8$  Hz), 128.0 (d,  $J_{C-P} = 11.8$  Hz), 127.0 (d,  $J_{C-P} = 2.3$  Hz), 125.2, 41.0 (d,  $J_{C-P} = 69.2$  Hz), 39.0, 21.2.  $^{31}\text{P}$  NMR (202 MHz,  $\text{CDCl}_3$ )  $\delta$  35.0.

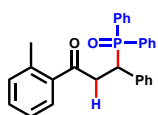

**3-(diphenylphosphoryl)-3-phenyl-1-(o-tolyl)propan-1-one (7c):**<sup>2</sup> white solid was obtained by column chromatography (eluent: EtOAc/petroleum ether = 1/2) with 72% isolated yield (76.3 mg). m. p. = 183–186 °C.  $^1\text{H}$  NMR (500 MHz,  $\text{CDCl}_3$ )  $\delta$  8.04 – 7.92 (m, 2H), 7.57 – 7.50 (m, 3H), 7.49 – 7.42 (m, 3H), 7.36 – 7.31 (m, 3H), 7.30 – 7.21 (m, 3H), 7.18 – 7.09 (m, 5H), 4.48 – 4.38 (m, 1H), 3.92 – 3.81 (m, 1H), 3.38 – 3.29 (m, 1H), 2.19 (s, 3H).  $^{13}\text{C}$  NMR (126 MHz,  $\text{CDCl}_3$ )  $\delta$  200.7 (d,  $J_{C-P} = 13.3$  Hz), 138.1, 137.3, 135.8 (d,  $J_{C-P} = 5.5$  Hz), 132.0 (d,  $J_{C-P} = 2.8$  Hz), 131.8, 131.6 (d,  $J_{C-P} = 81.0$  Hz), 131.4, 131.4 (d,  $J_{C-P} = 86.4$  Hz), 131.4 (d,  $J_{C-P} = 2.7$  Hz), 131.3 (d,  $J_{C-P} = 8.5$  Hz), 131.0 (d,  $J_{C-P} = 8.9$  Hz), 129.8 (d,  $J_{C-P} = 5.7$  Hz), 128.9 (d,  $J_{C-P} = 11.3$  Hz), 128.4, 128.3 (d,  $J_{C-P} = 1.8$  Hz), 128.0 (d,  $J_{C-P} = 11.8$  Hz), 127.0 (d,  $J_{C-P} = 2.3$  Hz), 125.6, 41.6, 41.6 (d,  $J_{C-P} = 81.0$  Hz), 20.9.  $^{31}\text{P}$  NMR (202 MHz,  $\text{CDCl}_3$ )  $\delta$  35.0.

HRMS (ESI)  $m/z$ :  $[M+H]^+$  calcd for  $C_{28}H_{26}O_2P$ : 425.1665; found: 425.1665.

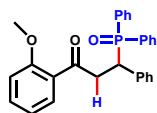

**3-(diphenylphosphoryl)-1-(2-methoxyphenyl)-3-phenylpropan-1-one (8c):**<sup>2</sup> white solid was obtained by column chromatography (eluent: EtOAc/petroleum ether = 2/1) with 70% isolated yield (77.0 mg). m. p. = 179-181 °C. <sup>1</sup>H NMR (500 MHz, CDCl<sub>3</sub>)  $\delta$  8.01 – 7.94 (m, 2H), 7.55 – 7.44 (m, 5H), 7.41 – 7.32 (m, 3H), 7.32 – 7.28 (m, 2H), 7.28 – 7.22 (m, 2H), 7.15 – 7.07 (m, 3H), 6.88 – 6.82 (m, 2H), 4.50 – 4.44 (m, 1H), 4.06 – 3.97 (m, 1H), 3.77 (s, 3H), 3.52 – 3.43 (m, 1H). <sup>13</sup>C NMR (126 MHz, CDCl<sub>3</sub>)  $\delta$  198.8 (d,  $J_{C-P}$  = 13.9 Hz), 158.6, 135.6 (d,  $J_{C-P}$  = 5.8 Hz), 133.7, 132.0 (d,  $J_{C-P}$  = 2.7 Hz), 131.5 (d,  $J_{C-P}$  = 2.8 Hz), 131.4 (d,  $J_{C-P}$  = 8.8 Hz), 131.0 (d,  $J_{C-P}$  = 9.0 Hz), 130.9 (d,  $J_{C-P}$  = 74.9 Hz), 130.7 (d,  $J_{C-P}$  = 70.4 Hz), 130.2, 130.0 (d,  $J_{C-P}$  = 5.8 Hz), 128.8 (d,  $J_{C-P}$  = 11.4 Hz), 128.1 (d,  $J_{C-P}$  = 0.7 Hz), 128.1 (d,  $J_{C-P}$  = 8.7 Hz), 127.5, 126.9 (d,  $J_{C-P}$  = 2.4 Hz), 120.4, 111.4, 55.4, 43.5, 41.3 (d,  $J_{C-P}$  = 69.1 Hz). <sup>31</sup>P NMR (202 MHz, CDCl<sub>3</sub>)  $\delta$  34.0. HRMS (ESI)  $m/z$ :  $[M+H]^+$  calcd for  $C_{28}H_{26}O_3P$ : 441.1614; found: 441.1614.

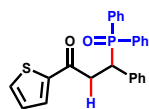

**3-(diphenylphosphoryl)-3-phenyl-1-(thiophen-2-yl)propan-1-one (9c):** yellow solid was obtained by column chromatography (eluent: EtOAc/petroleum ether = 1/2) with 66% isolated yield (68.7 mg). m. p. = 149-152 °C. <sup>1</sup>H NMR (500 MHz, CDCl<sub>3</sub>)  $\delta$  7.99 – 7.92 (m, 2H), 7.89 – 7.84 (m, 2H), 7.61 – 7.56 (m, 2H), 7.53 – 7.49 (m, 4H), 7.42 – 7.36 (m, 3H), 7.35 – 7.29 (m, 2H), 7.06 – 6.98 (m, 2H), 6.82 – 6.76 (m, 1H), 4.87 – 4.80 (m, 1H), 4.00 – 3.91 (m, 1H), 3.40 – 3.30 (m, 1H). <sup>13</sup>C NMR (126 MHz, CDCl<sub>3</sub>)  $\delta$  196.3 (d,  $J_{C-P}$  = 12.6 Hz), 137.6 (d,  $J_{C-P}$  = 6.5 Hz), 136.3, 133.4, 132.1 (d,  $J_{C-P}$  = 2.6 Hz), 131.6 (d,  $J_{C-P}$  = 2.7 Hz), 131.3 (d,  $J_{C-P}$  = 8.6 Hz), 131.2 (d,  $J_{C-P}$  = 96.0 Hz), 131.0 (d,  $J_{C-P}$  = 8.9 Hz), 131.0 (d,  $J_{C-P}$  = 95.0 Hz), 128.9 (d,  $J_{C-P}$  = 11.3 Hz), 128.5, 128.2, 128.1, 127.4 (d,  $J_{C-P}$  = 6.5 Hz), 126.7 (d,  $J_{C-P}$  = 2.5 Hz), 124.9 (d,  $J_{C-P}$  = 2.7 Hz), 39.9, 36.5 (d,  $J_{C-P}$  = 70.9 Hz). <sup>31</sup>P NMR (202 MHz, CDCl<sub>3</sub>)  $\delta$  33.3. HRMS (ESI)  $m/z$ :  $[M+H]^+$  calcd for  $C_{25}H_{22}O_2PS$ : 417.1073; found: 417.1069.

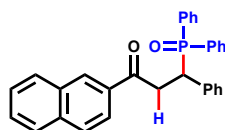

**3-(diphenylphosphoryl)-1-(naphthalen-2-yl)-3-phenylpropan-1-one (10c):** yellow solid was obtained by column chromatography (eluent: EtOAc/petroleum ether = 1/2) with 61% isolated yield (70.1 mg).

$^1\text{H}$  NMR (500 MHz,  $\text{CDCl}_3$ )  $\delta$  8.40 (s, 1H), 8.02 (m, 2H), 7.89 (t,  $J = 8.3$  Hz, 2H), 7.79 (t,  $J = 8.0$  Hz, 2H), 7.51 (m, 7H), 7.42 (d,  $J = 7.6$  Hz, 2H), 7.34 (t,  $J = 7.4$  Hz, 1H), 7.25 (m, 2H), 7.15 (t,  $J = 7.5$  Hz, 2H), 7.10 (d,  $J = 7.0$  Hz, 1H), 4.55-4.51 (m, 1H), 4.16-4.23 (m, 1H), 3.48-3.55 (m, 1H).  $^{13}\text{C}$  NMR (126 MHz,  $\text{CDCl}_3$ )  $\delta$  196.5 (d,  $J_{\text{C-P}} = 13.4$  Hz), 135.9 (d,  $J_{\text{C-P}} = 5.6$  Hz), 135.6, 133.6, 132.3, 132.1 (d,  $J_{\text{C-P}} = 2.6$  Hz), 131.6 (d,  $J_{\text{C-P}} = 100.7$  Hz), 131.4 (d,  $J_{\text{C-P}} = 2.7$  Hz), 131.3 (d,  $J_{\text{C-P}} = 8.5$  Hz), 131.3 (d,  $J_{\text{C-P}} = 103.0$  Hz), 130.9 (d,  $J_{\text{C-P}} = 8.9$  Hz), 130.1, 129.8 (d,  $J_{\text{C-P}} = 5.7$  Hz), 129.6, 128.9 (d,  $J_{\text{C-P}} = 11.2$  Hz), 128.6, 128.3 (d,  $J_{\text{C-P}} = 2.5$  Hz), 128.3, 128.1 (d,  $J_{\text{C-P}} = 11.8$  Hz), 127.6, 127.1 (d,  $J_{\text{C-P}} = 2.3$  Hz), 126.8, 123.5, 41.2 (d,  $J_{\text{C-P}} = 69.0$  Hz), 38.9.  $^{31}\text{P}$  NMR (202 MHz,  $\text{CDCl}_3$ )  $\delta$  34.6. HRMS (ESI)  $m/z$ :  $[\text{M}+\text{H}]^+$  calcd for  $\text{C}_{31}\text{H}_{26}\text{O}_2\text{P}$ : 461.1665; found: 461.1665.

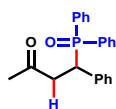

**4-(diphenylphosphoryl)-4-phenylbutan-2-one (11c):**<sup>2</sup> white solid was obtained by column chromatography (eluent: EtOAc/petroleum ether = 1/2) with 78% isolated yield (67.9 mg).  $^1\text{H}$  NMR (500 MHz,  $\text{CDCl}_3$ )  $\delta$  7.97 – 7.89 (m, 2H), 7.58 – 7.50 (m, 3H), 7.46 – 7.40 (m, 2H), 7.35 – 7.27 (m, 3H), 7.25 – 7.20 (m, 2H), 7.18 – 7.11 (m, 3H), 4.25 – 4.19 (m, 1H), 3.38 – 3.28 (m, 1H), 3.00 – 2.89 (m, 1H), 1.95 (s, 3H).  $^{13}\text{C}$  NMR (126 MHz,  $\text{CDCl}_3$ )  $\delta$  205.3 (d,  $J_{\text{C-P}} = 12.7$  Hz), 135.8 (d,  $J_{\text{C-P}} = 5.5$  Hz), 132.0 (d,  $J_{\text{C-P}} = 2.6$  Hz), 131.4 (d,  $J_{\text{C-P}} = 101.7$  Hz), 131.4 (d,  $J_{\text{C-P}} = 2.7$  Hz), 131.3 (d,  $J_{\text{C-P}} = 8.6$  Hz), 131.3 (d,  $J_{\text{C-P}} = 101.5$  Hz), 130.9 (d,  $J_{\text{C-P}} = 8.9$  Hz), 129.7 (d,  $J_{\text{C-P}} = 5.7$  Hz), 128.9 (d,  $J_{\text{C-P}} = 11.2$  Hz), 128.3 (d,  $J_{\text{C-P}} = 1.7$  Hz), 128.0 (d,  $J_{\text{C-P}} = 11.8$  Hz), 127.1 (d,  $J_{\text{C-P}} = 2.3$  Hz), 43.5, 41.1 (d,  $J_{\text{C-P}} = 68.7$  Hz), 30.6.  $^{31}\text{P}$  NMR (202 MHz,  $\text{CDCl}_3$ )  $\delta$  33.7.

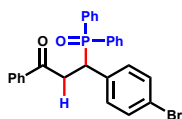

**3-(4-bromophenyl)-3-(diphenylphosphoryl)-1-phenylpropan-1-one (12c):**<sup>2</sup> white solid was obtained by column chromatography (eluent: EtOAc/petroleum ether = 1/2) with 69% isolated yield (84.2 mg).  $^1\text{H}$  NMR (500 MHz,  $\text{CDCl}_3$ )  $\delta$  8.00 – 7.93 (m, 2H), 7.85 – 7.80 (m, 2H), 7.55 – 7.47 (m, 6H), 7.41 – 7.36 (m, 3H), 7.32 – 7.26 (m, 6H), 4.47 – 4.39 (m, 1H), 4.00 – 3.91 (m, 1H), 3.40 – 3.31 (m, 1H).  $^{13}\text{C}$  NMR (126 MHz,  $\text{CDCl}_3$ )  $\delta$  196.4 (d,  $J_{\text{C-P}} = 13.2$  Hz), 135.2 (d,  $J_{\text{C-P}} = 5.7$  Hz), 133.5, 132.6 (d,  $J_{\text{C-P}} = 2.7$  Hz), 132.1 (d,  $J_{\text{C-P}} = 2.8$  Hz), 131.6 (d,  $J_{\text{C-P}} = 3.4$  Hz), 131.4 (d,  $J_{\text{C-P}} = 5.8$  Hz), 131.4 (d,  $J_{\text{C-P}} = 1.6$  Hz), 131.3 (d,  $J_{\text{C-P}} = 100.5$  Hz), 131.2 (d,  $J_{\text{C-P}} = 8.6$  Hz), 131.1 (d,  $J_{\text{C-P}} = 99.5$  Hz), 130.8 (d,  $J_{\text{C-P}} = 8.8$  Hz), 129.0 (d,  $J_{\text{C-P}} = 11.3$  Hz), 128.7 (d,  $J_{\text{C-P}} = 12.3$  Hz), 128.6, 128.2 (d,  $J_{\text{C-P}} = 11.8$  Hz), 128.0, 121.1 (d,  $J_{\text{C-P}} = 11.8$  Hz), 128.7 (d,  $J_{\text{C-P}} = 12.3$  Hz), 128.6, 128.2 (d,  $J_{\text{C-P}} = 11.8$  Hz), 128.0, 121.1 (d,  $J_{\text{C-P}} = 11.8$  Hz).

$J_{C-P} = 2.9$  Hz), 40.5 (d,  $J_{C-P} = 68.9$  Hz), 38.9.  $^{31}\text{P}$  NMR (202 MHz,  $\text{CDCl}_3$ )  $\delta$  33.8.

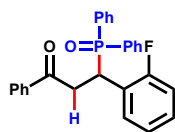

**3-(diphenylphosphoryl)-3-(2-fluorophenyl)-1-phenylpropan-1-one (13c):**<sup>2</sup> white solid was obtained by column chromatography (eluent: EtOAc/petroleum ether = 1/1) with 68% isolated yield (72.8 mg). m. p. = 187-190 °C.  $^1\text{H}$  NMR (500 MHz,  $\text{CDCl}_3$ )  $\delta$  8.05 – 7.98 (m, 2H), 7.88 – 7.83 (m, 2H), 7.73 – 7.68 (m, 1H), 7.56 – 7.48 (m, 6H), 7.39 – 7.32 (m, 3H), 7.28 – 7.23 (m, 2H), 7.09 – 7.01 (m, 2H), 6.81 – 6.75 (m, 1H), 4.95 – 4.87 (m, 1H), 4.14 – 4.02 (m, 1H), 3.44 – 3.36 (m, 1H).  $^{13}\text{C}$  NMR (126 MHz,  $\text{CDCl}_3$ )  $\delta$  196.1 (d,  $J_{C-P} = 13.2$  Hz), 160.4 (dd,  $J_{C-F, C-P} = 246.3, 6.3$  Hz), 136.2, 133.3, 132.2 (d,  $J_{C-P} = 2.7$  Hz), 131.6 (d,  $J_{C-P} = 2.8$  Hz), 131.2 (d,  $J_{C-P} = 8.7$  Hz), 131.1 (d,  $J_{C-P} = 101.6$  Hz), 130.9 (d,  $J_{C-P} = 95.2$  Hz), 130.7 (d,  $J_{C-P} = 9.4$  Hz), 129.0 (d,  $J_{C-P} = 11.4$  Hz), 128.5, 128.1, 128.1 (d,  $J_{C-P} = 11.9$  Hz), 124.3, 123.3 (dd,  $J_{C-F, C-P} = 14.5, 5.4$  Hz), 114.9 (d,  $J_{C-F} = 23.1$  Hz), 38.3, 32.4 (d,  $J_{C-P} = 69.4$  Hz).  $^{19}\text{F}$  NMR (471 MHz,  $\text{CDCl}_3$ )  $\delta$  -115.9 (d,  $J = 3.8$  Hz).  $^{31}\text{P}$  NMR (202 MHz,  $\text{CDCl}_3$ )  $\delta$  34.0. HRMS (ESI)  $m/z$ :  $[\text{M}+\text{H}]^+$  calcd for  $\text{C}_{27}\text{H}_{23}\text{FO}_2\text{P}$ : 429.1414; found: 429.1414.1

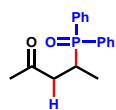

**4-(diphenylphosphoryl)pentan-2-one (14c):** yellow oil was obtained by column chromatography (eluent: EtOAc/petroleum ether = 1/1) with 67% isolated yield (95.8 mg).  $^1\text{H}$  NMR (500 MHz,  $\text{CDCl}_3$ )  $\delta$  7.86 – 7.76 (m, 4H), 7.54 – 7.44 (m, 6H), 3.18 – 3.04 (m, 1H), 2.68 (dd,  $J = 9.2, 5.3$  Hz, 2H), 2.07 (s, 3H), 1.13 (dd,  $J = 16.4, 7.0$  Hz, 3H).  $^{13}\text{C}$  NMR (126 MHz,  $\text{CDCl}_3$ )  $\delta$  206.0 (d,  $J_{C-P} = 13.4$  Hz), 131.8 (d,  $J_{C-P} = 2.5$  Hz), 131.7 (d,  $J_{C-P} = 95.9$  Hz), 131.7 (d,  $J_{C-P} = 2.6$  Hz), 131.6 (d,  $J_{C-P} = 97.8$  Hz), 130.9 (d,  $J_{C-P} = 9.2$  Hz), 130.9 (d,  $J_{C-P} = 9.0$  Hz), 128.8 (d,  $J_{C-P} = 11.3$  Hz), 128.6 (d,  $J_{C-P} = 11.5$  Hz), 42.8, 30.5, 27.3 (d,  $J_{C-P} = 73.9$  Hz), 13.0 (d,  $J_{C-P} = 2.8$  Hz).  $^{31}\text{P}$  NMR (202 MHz,  $\text{CDCl}_3$ )  $\delta$  37.3. HRMS (ESI)  $m/z$ :  $[\text{M}+\text{H}]^+$  calcd for  $\text{C}_{17}\text{H}_{20}\text{O}_2\text{P}$ : 287.1195; found: 287.1194.

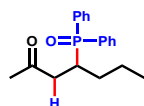

**4-(diphenylphosphoryl)heptan-2-one (15c):** white solid was obtained by column chromatography (eluent: EtOAc/petroleum ether = 2/1) with 58% isolated yield (91.1 mg). m. p. = 112-114 °C.  $^1\text{H}$  NMR (500 MHz,  $\text{CDCl}_3$ )  $\delta$  7.86 – 7.77 (m, 4H), 7.52 – 7.42 (m, 6H), 3.25 – 3.17 (m, 1H), 2.86 – 2.76 (m, 1H),

2.70 – 2.62 (m, 1H), 1.99 (s, 3H), 1.63 – 1.44 (m, 2H), 1.33 – 1.25 (m, 1H), 1.19 – 1.09 (m, 1H), 0.79 (t,  $J = 7.3$  Hz, 3H).  $^{13}\text{C}$  NMR (126 MHz,  $\text{CDCl}_3$ )  $\delta$  206.0 (d,  $J_{\text{C-P}} = 9.7$  Hz), 131.9 (d,  $J_{\text{C-P}} = 2.7$  Hz), 131.8 (d,  $J_{\text{C-P}} = 2.7$  Hz), 131.6 (d,  $J_{\text{C-P}} = 97.1$  Hz), 130.9 (d,  $J_{\text{C-P}} = 18.5$  Hz), 128.7 (d,  $J_{\text{C-P}} = 11.5$  Hz), 41.6, 31.1 (d,  $J_{\text{C-P}} = 72.9$  Hz), 30.6 (d,  $J_{\text{C-P}} = 1.8$  Hz), 30.0, 20.8 (d,  $J_{\text{C-P}} = 11.4$  Hz), 13.9.  $^{31}\text{P}$  NMR (202 MHz,  $\text{CDCl}_3$ )  $\delta$  37.3. HRMS (ESI)  $m/z$ :  $[\text{M}+\text{H}]^+$  calcd for  $\text{C}_{19}\text{H}_{24}\text{O}_2\text{P}$ : 315.1508; found: 315.1506.

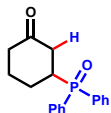

**3-(diphenylphosphoryl)cyclohexan-1-one (16c):**<sup>2</sup> yellow oil was obtained by column chromatography (eluent: EtOAc/petroleum ether = 2/1) with 81% isolated yield (120.7 mg).  $^1\text{H}$  NMR (500 MHz,  $\text{CDCl}_3$ )  $\delta$  7.86 – 7.74 (m, 4H), 7.58 – 7.45 (m, 6H), 2.78 – 2.67 (m, 2H), 2.44 – 2.35 (m, 2H), 2.30 – 2.24 (m, 1H), 2.22 – 2.14 (m, 1H), 2.03 – 1.93 (m, 1H), 1.88 – 1.80 (m, 1H), 1.77 – 1.65 (m, 1H).  $^{13}\text{C}$  NMR (126 MHz,  $\text{CDCl}_3$ )  $\delta$  209.6 (d,  $J_{\text{C-P}} = 14.2$  Hz), 132.2 (d,  $J_{\text{C-P}} = 2.8$  Hz), 132.1 (d,  $J_{\text{C-P}} = 2.8$  Hz), 130.9 (d,  $J_{\text{C-P}} = 3.4$  Hz), 130.8 (d,  $J_{\text{C-P}} = 3.4$  Hz), 130.4 (d,  $J_{\text{C-P}} = 98.4$  Hz), 129.9 (d,  $J_{\text{C-P}} = 97.7$  Hz), 128.9 (d,  $J_{\text{C-P}} = 2.4$  Hz), 128.8 (d,  $J_{\text{C-P}} = 2.4$  Hz), 41.0, 39.2 (d,  $J_{\text{C-P}} = 3.2$  Hz), 37.6 (d,  $J_{\text{C-P}} = 71.6$  Hz), 26.3 (d,  $J_{\text{C-P}} = 15.6$  Hz), 23.2 (d,  $J_{\text{C-P}} = 2.9$  Hz).  $^{31}\text{P}$  NMR (202 MHz,  $\text{CDCl}_3$ )  $\delta$  33.6.

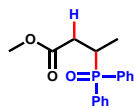

**methyl 3-(diphenylphosphoryl)butanoate (17c):**<sup>2</sup> yellow oil was obtained by column chromatography (eluent: EtOAc/petroleum ether = 1/1) with 41% isolated yield (61.9 mg).  $^1\text{H}$  NMR (500 MHz,  $\text{CDCl}_3$ )  $\delta$  7.85 – 7.79 (m, 4H), 7.54 – 7.46 (m, 6H), 3.62 (s, 3H), 3.03 – 2.93 (m, 1H), 2.66 – 2.59 (m, 1H), 2.51 – 2.43 (m, 1H), 1.20 (dd,  $J = 16.2, 7.1$  Hz, 3H).  $^{13}\text{C}$  NMR (126 MHz,  $\text{CDCl}_3$ )  $\delta$  172.4 (d,  $J_{\text{C-P}} = 17.7$  Hz), 131.8 (d,  $J_{\text{C-P}} = 6.9$  Hz), 131.3 (d,  $J_{\text{C-P}} = 96.4$  Hz), 131.0 (d,  $J_{\text{C-P}} = 8.8$  Hz), 128.7 (d,  $J_{\text{C-P}} = 11.1$  Hz), 51.9, 34.1, 29.2 (d,  $J_{\text{C-P}} = 73.3$  Hz), 12.9 (d,  $J_{\text{C-P}} = 2.7$  Hz).  $^{31}\text{P}$  NMR (202 MHz,  $\text{CDCl}_3$ )  $\delta$  36.4.

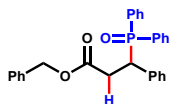

**benzyl 3-(diphenylphosphoryl)-3-phenylpropanoate (18c):** white solid was obtained by column chromatography (eluent: EtOAc/petroleum ether = 1/2) with 53% isolated yield (116.6 mg). m. p. = 189–191 °C.  $^1\text{H}$  NMR (500 MHz,  $\text{CDCl}_3$ )  $\delta$  7.99 – 7.90 (m, 2H), 7.57 – 7.49 (m, 3H), 7.44 (dd,  $J = 11.2, 7.6$  Hz, 2H), 7.36 – 7.31 (m, 1H), 7.28 – 7.21 (m, 7H), 7.18 – 7.13 (m, 3H), 7.06 (dd,  $J = 6.5, 3.0$  Hz, 2H), 4.90 (s, 2H), 4.12 – 4.05 (m, 1H), 3.22 – 3.12 (m, 1H), 3.00 – 2.90 (m, 1H).  $^{13}\text{C}$  NMR (126 MHz,  $\text{CDCl}_3$ )

$\delta$  171.2 (d,  $J_{C-P}$  = 17.5 Hz), 135.4, 134.9 (d,  $J_{C-P}$  = 5.5 Hz), 132.1 (d,  $J_{C-P}$  = 2.6 Hz), 131.5 (d,  $J_{C-P}$  = 2.6 Hz), 131.4 (d,  $J_{C-P}$  = 8.6 Hz), 131.2 (d,  $J_{C-P}$  = 100.7 Hz), 131.1 (d,  $J_{C-P}$  = 8.9 Hz), 131.0 (d,  $J_{C-P}$  = 103.2 Hz), 129.7 (d,  $J_{C-P}$  = 5.4 Hz), 128.9 (d,  $J_{C-P}$  = 11.3 Hz), 128.4, 128.3 (d,  $J_{C-P}$  = 1.7 Hz), 128.1, 128.0 (d,  $J_{C-P}$  = 4.0 Hz), 127.8, 127.3 (d,  $J_{C-P}$  = 2.4 Hz), 66.5, 43.0 (d,  $J_{C-P}$  = 67.9 Hz), 34.9.  $^{31}\text{P}$  NMR (202 MHz,  $\text{CDCl}_3$ )  $\delta$  36.4. HRMS (ESI)  $m/z$ :  $[\text{M}+\text{H}]^+$  calcd for  $\text{C}_{28}\text{H}_{26}\text{O}_3\text{P}$ : 441.1614; found: 441.1613.

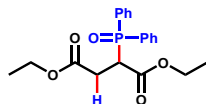

**diethyl 2-(diphenylphosphoryl)succinate (19c):**<sup>2</sup> white solid was obtained by column chromatography (eluent: EtOAc/petroleum ether = 1/2) with 96% isolated yield (179.6 mg).  $^1\text{H}$  NMR (500 MHz,  $\text{CDCl}_3$ )  $\delta$  7.91 – 7.82 (m, 4H), 7.59 – 7.54 (m, 2H), 7.53 – 7.46 (m, 4H), 4.12 – 4.03 (m, 3H), 3.97 – 3.80 (m, 2H), 3.20 – 3.10 (m, 1H), 2.81 – 2.72 (m, 1H), 1.19 (t,  $J$  = 7.1 Hz, 3H), 0.88 (t,  $J$  = 7.2 Hz, 3H).  $^{13}\text{C}$  NMR (126 MHz,  $\text{CDCl}_3$ )  $\delta$  171.2 (d,  $J_{C-P}$  = 15.7 Hz), 168.4 (d,  $J_{C-P}$  = 2.9 Hz), 132.4 (d,  $J_{C-P}$  = 2.8 Hz), 132.3 (d,  $J_{C-P}$  = 2.9 Hz), 131.6 (d,  $J_{C-P}$  = 9.5 Hz), 131.3 (d,  $J_{C-P}$  = 9.6 Hz), 130.5 (d,  $J_{C-P}$  = 102.4 Hz), 129.6 (d,  $J_{C-P}$  = 102.1 Hz), 128.7 (d,  $J_{C-P}$  = 12.2 Hz), 128.4 (d,  $J_{C-P}$  = 12.3 Hz), 61.3 (d,  $J_{C-P}$  = 48.6 Hz), 44.5 (d,  $J_{C-P}$  = 59.1 Hz), 30.7, 13.7 (d,  $J_{C-P}$  = 70.7 Hz).  $^{31}\text{P}$  NMR (202 MHz,  $\text{CDCl}_3$ )  $\delta$  30.2.

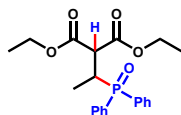

**diethyl 2-(1-(diphenylphosphoryl)ethyl)malonate (20c):**<sup>2</sup> yellow oil was obtained by column chromatography (eluent: EtOAc/petroleum ether = 1/2) with 74% isolated yield (143.6 mg).  $^1\text{H}$  NMR (500 MHz,  $\text{CDCl}_3$ )  $\delta$  7.91 – 7.79 (m, 4H), 7.55 – 7.43 (m, 6H), 4.21 – 4.12 (m, 2H), 3.98 – 3.89 (m, 1H), 3.86 – 3.76 (m, 2H), 3.42 – 3.33 (m, 1H), 1.31 – 1.23 (m, 6H), 1.12 (t,  $J$  = 7.1 Hz, 3H).  $^{13}\text{C}$  NMR (126 MHz,  $\text{CDCl}_3$ )  $\delta$  167.9 (d,  $J_{C-P}$  = 9.3 Hz), 167.4 (d,  $J_{C-P}$  = 9.1 Hz), 132.0 (d,  $J_{C-P}$  = 3.8 Hz), 131.9 (d,  $J_{C-P}$  = 3.0 Hz), 131.4 (d,  $J_{C-P}$  = 9.2 Hz), 131.2 (d,  $J_{C-P}$  = 8.8 Hz), 130.9 (d,  $J_{C-P}$  = 96.8 Hz), 130.5 (d,  $J_{C-P}$  = 98.4 Hz), 128.6 (d,  $J_{C-P}$  = 11.6 Hz), 128.5 (d,  $J_{C-P}$  = 11.7 Hz), 61.6 (d,  $J_{C-P}$  = 17.7 Hz), 50.5, 32.5 (d,  $J_{C-P}$  = 71.3 Hz), 13.8 (d,  $J_{C-P}$  = 20.6 Hz), 10.9 (d,  $J_{C-P}$  = 2.0 Hz).  $^{31}\text{P}$  NMR (202 MHz,  $\text{CDCl}_3$ )  $\delta$  30.3.

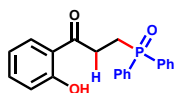

**3-(diphenylphosphoryl)-1-(2-hydroxyphenyl)propan-1-one (21c):** yellow oil was obtained by column chromatography (eluent: EtOAc/petroleum ether = 1/1) with 47% isolated yield (82.3 mg).  $^1\text{H}$  NMR (500 MHz,  $\text{CDCl}_3$ )  $\delta$  11.98 (s, 1H), 7.79 (dd,  $J$  = 11.7, 7.4 Hz, 4H), 7.74 – 7.68 (m, 1H), 7.58 – 7.51 (m, 2H),

7.53 – 7.42 (m, 6H), 6.95 (d,  $J = 8.4$  Hz, 1H), 6.85 (t,  $J = 7.6$  Hz, 1H), 3.36 (q,  $J = 8.1$  Hz, 2H), 2.72 (q, 2H).  $^{13}\text{C}$  NMR (126 MHz,  $\text{CDCl}_3$ )  $\delta$  203.6 (d,  $J_{\text{C-P}} = 13.7$  Hz), 162.2, 136.6, 132.1 (d,  $J_{\text{C-P}} = 2.6$  Hz), 131.8 (d,  $J_{\text{C-P}} = 100.8$  Hz), 130.8 (d,  $J_{\text{C-P}} = 9.5$  Hz), 129.9, 128.8 (d,  $J_{\text{C-P}} = 11.8$  Hz), 119.1, 118.9, 118.4, 30.4, 29.5 (d,  $J_{\text{C-P}} = 42.4$  Hz).  $^{31}\text{P}$  NMR (202 MHz,  $\text{CDCl}_3$ )  $\delta$  33.2. HRMS (ESI)  $m/z$ :  $[\text{M}+\text{H}]^+$  calcd for  $\text{C}_{21}\text{H}_{20}\text{O}_3\text{P}$ : 351.1145; found: 351.1145.

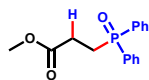

**methyl 3-(diphenylphosphoryl)propanoate (22c):**<sup>2</sup> yellow oil was obtained by column chromatography (eluent: EtOAc/petroleum ether = 2/1) with 85% isolated yield (122.4 mg).  $^1\text{H}$  NMR (500 MHz,  $\text{CDCl}_3$ )  $\delta$  7.79 – 7.73 (m, 4H), 7.56 – 7.51 (m, 2H), 7.51 – 7.46 (m, 4H), 3.62 (s, 3H), 2.69 – 2.61 (m, 4H).  $^{13}\text{C}$  NMR (126 MHz,  $\text{CDCl}_3$ )  $\delta$  172.6 (d,  $J_{\text{C-P}} = 16.8$  Hz), 132.1 (d,  $J_{\text{C-P}} = 2.7$  Hz), 131.5 (d,  $J_{\text{C-P}} = 100.7$  Hz), 130.8 (d,  $J_{\text{C-P}} = 9.6$  Hz), 128.8 (d,  $J_{\text{C-P}} = 11.9$  Hz), 52.0, 26.1 (d,  $J_{\text{C-P}} = 2.2$  Hz), 24.8 (d,  $J_{\text{C-P}} = 73.1$  Hz).  $^{31}\text{P}$  NMR (202 MHz,  $\text{CDCl}_3$ )  $\delta$  33.3.

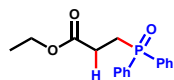

**ethyl 3-(diphenylphosphoryl)propanoate (23c):**<sup>2</sup> yellow oil was obtained by column chromatography (eluent: EtOAc/petroleum ether = 1/2) with 72% isolated yield (108.8 mg).  $^1\text{H}$  NMR (500 MHz,  $\text{CDCl}_3$ )  $\delta$  7.80 – 7.71 (m, 4H), 7.58 – 7.41 (m, 6H), 4.08 (q,  $J = 7.1$  Hz, 2H), 2.67 – 2.56 (m, 4H), 1.20 (t,  $J = 7.1$  Hz, 3H).  $^{13}\text{C}$  NMR (126 MHz,  $\text{CDCl}_3$ )  $\delta$  172.3 (d,  $J_{\text{C-P}} = 16.8$  Hz), 132.0 (d,  $J_{\text{C-P}} = 99.9$  Hz), 132.0 (d,  $J_{\text{C-P}} = 2.7$  Hz), 130.8 (d,  $J_{\text{C-P}} = 9.4$  Hz), 128.7 (d,  $J_{\text{C-P}} = 11.8$  Hz), 60.9, 24.9 (d,  $J_{\text{C-P}} = 73.1$  Hz), 14.1.  $^{31}\text{P}$  NMR (202 MHz,  $\text{CDCl}_3$ )  $\delta$  33.3.

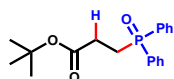

**tert-butyl 3-(diphenylphosphoryl)propanoate (24c):**<sup>2</sup> white solid was obtained by column chromatography (eluent: EtOAc/petroleum ether = 1/2) with 76% isolated yield (125.5 mg).  $^1\text{H}$  NMR (500 MHz,  $\text{CDCl}_3$ )  $\delta$  7.79 – 7.72 (m, 4H), 7.55 – 7.45 (m, 6H), 2.63 – 2.52 (m, 4H), 1.40 (s, 9H).  $^{13}\text{C}$  NMR (126 MHz,  $\text{CDCl}_3$ )  $\delta$  171.5 (d,  $J_{\text{C-P}} = 17.1$  Hz), 132.0 (d,  $J_{\text{C-P}} = 2.7$  Hz), 131.9 (d,  $J_{\text{C-P}} = 100.1$  Hz), 130.8 (d,  $J_{\text{C-P}} = 9.5$  Hz), 128.7 (d,  $J_{\text{C-P}} = 11.8$  Hz), 81.0, 27.9, 24.8 (d,  $J_{\text{C-P}} = 73.2$  Hz).  $^{31}\text{P}$  NMR (202 MHz,  $\text{CDCl}_3$ )  $\delta$  36.5.

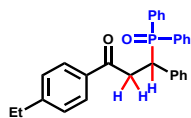

**3-(diphenylphosphoryl)-1-(4-ethylphenyl)-3-phenylpropan-1-one (29c):** white solid was obtained by



column chromatography (eluent: EtOAc/petroleum ether = 1/2) with 63% isolated yield (69.0 mg). m. p. = 179-180 °C. <sup>1</sup>H NMR (500 MHz, CDCl<sub>3</sub>) δ 8.02 – 7.94 (m, 2H), 7.80 – 7.75 (m, 2H), 7.55 – 7.49 (m, 3H), 7.48 – 7.43 (m, 2H), 7.39 – 7.36 (m, 2H), 7.35 – 7.31 (m, 1H), 7.26 – 7.21 (m, 2H), 7.19 (d, *J* = 8.1 Hz, 2H), 7.16 – 7.11 (m, 2H), 7.11 – 7.06 (m, 1H), 4.51 – 4.43 (m, 1H), 4.06 – 3.95 (m, 1H), 3.40 – 3.31 (m, 1H), 2.64 (q, *J* = 7.6 Hz, 2H), 1.20 (t, *J* = 7.6 Hz, 3H). <sup>13</sup>C NMR (126 MHz, CDCl<sub>3</sub>) δ 196.2 (d, *J*<sub>C-P</sub> = 13.2 Hz), 150.3, 136.0 (d, *J*<sub>C-P</sub> = 5.6 Hz), 134.1, 131.9 (d, *J*<sub>C-P</sub> = 2.6 Hz), 131.8 (d, *J*<sub>C-P</sub> = 105.6 Hz), 131.6 (d, *J*<sub>C-P</sub> = 98.5 Hz), 131.3 (d, *J*<sub>C-P</sub> = 8.7 Hz), 130.9 (d, *J*<sub>C-P</sub> = 8.9 Hz), 129.8 (d, *J*<sub>C-P</sub> = 5.7 Hz), 128.9 (d, *J*<sub>C-P</sub> = 11.2 Hz), 128.3, 128.2 (d, *J*<sub>C-P</sub> = 1.7 Hz), 128.0 (d, *J*<sub>C-P</sub> = 11.8 Hz), 128.0, 126.9, 41.0 (d, *J* = 69.2 Hz), 38.8, 28.9, 15.1. <sup>31</sup>P NMR (202 MHz, CDCl<sub>3</sub>) δ 34.5. HRMS (EI) calcd for C<sub>29</sub>H<sub>28</sub>O<sub>2</sub>P [M + H]<sup>+</sup>: 439.1821; found: 439.1821.

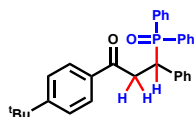

**1-(4-(tert-butyl)phenyl)-3-(diphenylphosphoryl)-3-phenylpropan-1-one (30c):** white solid was obtained by column chromatography (eluent: EtOAc/petroleum ether = 1/2) with 51% isolated yield (59.4 mg). m. p. = 108-110 °C. <sup>1</sup>H NMR (500 MHz, CDCl<sub>3</sub>) δ 8.01 – 7.96 (m, 2H), 7.83 – 7.79 (m, 2H), 7.54 – 7.50 (m, 3H), 7.47 – 7.44 (m, 2H), 7.40 – 7.33 (m, 5H), 7.26 – 7.22 (m, 2H), 7.15 – 7.12 (m, 2H), 7.10 – 7.08 (m, 1H), 4.51 – 4.45 (m, 1H), 4.09 – 4.01 (m, 1H), 3.40 – 3.31 (m, 1H), 1.28 (s, 9H). <sup>13</sup>C NMR (126 MHz, CDCl<sub>3</sub>) δ 196.1 (d, *J*<sub>C-P</sub> = 13.4 Hz), 157.2, 135.8 (d, *J*<sub>C-P</sub> = 5.8 Hz), 133.8, 132.0 (d, *J*<sub>C-P</sub> = 2.6 Hz), 131.5 (d, *J*<sub>C-P</sub> = 101.1 Hz), 131.4 (d, *J*<sub>C-P</sub> = 2.6 Hz), 131.3 (d, *J*<sub>C-P</sub> = 8.5 Hz), 131.2 (d, *J*<sub>C-P</sub> = 94.7 Hz), 130.9 (d, *J*<sub>C-P</sub> = 9.0 Hz), 129.8 (d, *J*<sub>C-P</sub> = 5.7 Hz), 128.9 (d, *J*<sub>C-P</sub> = 11.3 Hz), 128.2 (d, *J*<sub>C-P</sub> = 1.6 Hz), 128.1, 128.0, 127.0 (d, *J*<sub>C-P</sub> = 2.3 Hz), 125.5, 41.0 (d, *J*<sub>C-P</sub> = 69.4 Hz), 38.8, 35.0, 31.0. <sup>31</sup>P NMR (202 MHz, CDCl<sub>3</sub>) δ 34.5. HRMS (EI) calcd for C<sub>31</sub>H<sub>32</sub>O<sub>2</sub>P [M + H]<sup>+</sup>: 467.2134; found: 467.2134.

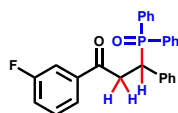

**3-(diphenylphosphoryl)-1-(3-fluorophenyl)-3-phenylpropan-1-one (31c):** white solid was obtained by column chromatography (eluent: EtOAc/petroleum ether = 1/1) with 76% isolated yield (81.3 mg). m. p. = 142-145 °C. <sup>1</sup>H NMR (500 MHz, CDCl<sub>3</sub>) δ 8.03 – 7.91 (m, 2H), 7.88 – 7.76 (m, 1H), 7.61 (t, *J* = 6.8 Hz, 1H), 7.53 – 7.44 (m, 6H), 7.40 – 7.31 (m, 4H), 7.25 – 7.22 (m, 1H), 7.22 – 7.09 (m, 4H), 4.47 – 4.39 (m, 1H), 4.00 – 3.91 (m, 1H), 3.42 – 3.34 (m, 1H). <sup>13</sup>C NMR (126 MHz, CDCl<sub>3</sub>) δ 195.6 (d, *J*<sub>C-P</sub> = 11.1 Hz), 162.7 (d, *J*<sub>C-F</sub> = 248.5 Hz), 132.0 (d, *J*<sub>C-F</sub> = 2.4 Hz), 131.7 (d, *J*<sub>C-P</sub> = 101.7 Hz), 131.6 (d, *J*

$J_{C-P} = 9.4$  Hz), 131.5 (d,  $J_{C-P} = 2.4$  Hz), 131.4 (d,  $J_{C-P} = 100.7$  Hz), 131.3 (d,  $J_{C-P} = 8.5$  Hz), 130.9 (d,  $J_{C-P} = 8.9$  Hz), 130.2 (d,  $J_{C-P} = 7.7$  Hz), 129.7 (d,  $J_{C-P} = 5.7$  Hz), 128.9 (d,  $J_{C-P} = 11.3$  Hz), 128.3 (d,  $J_{C-F} = 1.7$  Hz), 128.1 (d,  $J_{C-P} = 11.8$  Hz), 127.1 (d,  $J_{C-F} = 2.2$  Hz), 123.9, 120.3 (d,  $J_{C-F} = 21.4$  Hz), 114.8 (d,  $J_{C-F} = 22.5$  Hz), 41.1 (d,  $J_{C-P} = 68.9$  Hz), 39.2.  $^{19}\text{F}$  NMR (471 MHz,  $\text{CDCl}_3$ )  $\delta$  -111.6.  $^{31}\text{P}$  NMR (202 MHz,  $\text{CDCl}_3$ )  $\delta$  34.4. HRMS (EI) calcd for  $\text{C}_{27}\text{H}_{23}\text{FO}_2\text{P}$   $[\text{M} + \text{H}]^+$ : 429.1414; found: 429.1408.

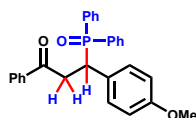

**3-(diphenylphosphoryl)-3-(4-methoxyphenyl)-1-phenylpropan-1-one (32c):**<sup>2</sup> white solid was obtained by column chromatography (eluent: EtOAc/petroleum ether = 2/1) with 74% isolated yield (81.2 mg).  $^1\text{H}$  NMR (500 MHz,  $\text{CDCl}_3$ )  $\delta$  8.00 – 7.95 (m, 2H), 7.85 – 7.82 (m, 2H), 7.52 – 7.47 (m, 6H), 7.38 – 7.34 (m, 3H), 7.31 – 7.26 (m, 4H), 6.70 – 6.67 (m, 2H), 4.46 – 4.39 (m, 1H), 4.01 – 3.92 (m, 1H), 3.68 (s, 3H), 3.38 – 3.29 (m, 1H).  $^{13}\text{C}$  NMR (126 MHz,  $\text{CDCl}_3$ )  $\delta$  196.8 (d,  $J_{C-P} = 13.5$  Hz), 158.5 (d,  $J_{C-P} = 2.3$  Hz), 136.4, 133.3, 132.0 (t,  $J_{C-P} = 49.1$  Hz), 131.9 (d,  $J_{C-P} = 2.7$  Hz), 131.8 (d,  $J_{C-P} = 100.3$  Hz), 131.5 (d,  $J_{C-P} = 103.9$  Hz), 131.3 (d,  $J_{C-P} = 2.7$  Hz), 131.2 (d,  $J_{C-P} = 8.5$  Hz), 131.0 (d,  $J_{C-P} = 8.8$  Hz), 130.8 (d,  $J_{C-P} = 5.7$  Hz), 128.9 (d,  $J_{C-P} = 11.2$  Hz), 128.5, 128.1 (d,  $J_{C-P} = 11.7$  Hz), 128.1, 127.7 (d,  $J_{C-P} = 5.7$  Hz), 113.7 (d,  $J_{C-P} = 1.6$  Hz), 55.1, 40.1 (d,  $J_{C-P} = 70.0$  Hz), 39.1.  $^{31}\text{P}$  NMR (202 MHz,  $\text{CDCl}_3$ )  $\delta$  34.0.

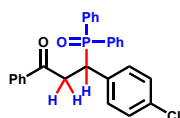

**3-(4-chlorophenyl)-3-(diphenylphosphoryl)-1-phenylpropan-1-one (33c):**<sup>2</sup> white solid was obtained by column chromatography (eluent: EtOAc/petroleum ether = 1/1) with 68% isolated yield (75.5 mg).  $^1\text{H}$  NMR (500 MHz,  $\text{CDCl}_3$ )  $\delta$  8.00 – 7.94 (m, 2H), 7.82 (d,  $J = 7.8$  Hz, 2H), 7.54 – 7.47 (m, 6H), 7.40 – 7.32 (m, 5H), 7.30 – 7.26 (m, 2H), 7.11 (d,  $J = 8.1$  Hz, 2H), 4.48 – 4.41 (m, 1H), 4.00 – 3.91 (m, 1H), 3.41 – 3.31 (m, 1H).  $^{13}\text{C}$  NMR (126 MHz,  $\text{CDCl}_3$ )  $\delta$  196.4 (d,  $J_{C-P} = 13.2$  Hz), 136.2, 134.6 (d,  $J_{C-P} = 5.5$  Hz), 133.5, 133.0 (d,  $J_{C-P} = 2.8$  Hz), 132.1 (d,  $J_{C-P} = 2.7$  Hz), 131.6 (d,  $J_{C-P} = 2.7$  Hz), 131.5 (d,  $J_{C-P} = 100.8$  Hz), 131.3 (d,  $J_{C-P} = 8.6$  Hz), 131.2 (d,  $J_{C-P} = 94.9$  Hz), 131.1 (d,  $J_{C-P} = 5.7$  Hz), 130.8 (d,  $J_{C-P} = 8.9$  Hz), 129.0 (d,  $J_{C-P} = 11.3$  Hz), 128.6, 128.4 (d,  $J_{C-P} = 1.6$  Hz), 128.2 (d,  $J_{C-P} = 11.8$  Hz), 128.0, 40.5 (d,  $J_{C-P} = 68.9$  Hz), 38.9.  $^{31}\text{P}$  NMR (202 MHz,  $\text{CDCl}_3$ )  $\delta$  34.3.

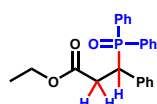

**ethyl 3-(diphenylphosphoryl)-3-phenylpropanoate (34c):**<sup>2</sup> yellow solid was obtained by column chromatography (eluent: EtOAc/petroleum ether = 1/2) with 30% isolated yield (56.7 mg). m. p. = 155–157 °C. <sup>1</sup>H NMR (500 MHz, CDCl<sub>3</sub>) δ 7.99 – 7.92 (m, 2H), 7.59 – 7.52 (m, 3H), 7.48 – 7.43 (m, 2H), 7.37 – 7.32 (m, 1H), 7.28 – 7.22 (m, 4H), 7.18 – 7.11 (m, 3H), 4.13 – 4.04 (m, 1H), 3.91 (q, *J* = 7.1 Hz, 2H), 3.16 – 3.04 (m, 1H), 2.94 – 2.85 (m, 1H), 1.02 (t, *J* = 7.1 Hz, 3H). <sup>13</sup>C NMR (126 MHz, CDCl<sub>3</sub>) δ 171.3 (d, *J*<sub>C-P</sub> = 17.2 Hz), 134.9 (d, *J*<sub>C-P</sub> = 5.5 Hz), 132.0 (d, *J*<sub>C-P</sub> = 2.6 Hz), 131.5 (d, *J*<sub>C-P</sub> = 2.7 Hz), 131.4 (d, *J*<sub>C-P</sub> = 8.6 Hz), 131.1 (d, *J*<sub>C-P</sub> = 100.6 Hz), 131.0 (d, *J*<sub>C-P</sub> = 8.9 Hz), 130.9 (d, *J*<sub>C-P</sub> = 98.8 Hz), 129.7 (d, *J*<sub>C-P</sub> = 5.5 Hz), 128.8 (d, *J*<sub>C-P</sub> = 11.4 Hz), 128.2 (d, *J*<sub>C-P</sub> = 1.8 Hz), 128.1 (d, *J*<sub>C-P</sub> = 11.8 Hz), 127.2 (d, *J*<sub>C-P</sub> = 2.4 Hz), 60.7, 42.9 (d, *J*<sub>C-P</sub> = 68.1 Hz), 34.8, 13.9. HRMS (EI) calcd for C<sub>23</sub>H<sub>24</sub>O<sub>3</sub>P [M + H]<sup>+</sup>: 379.1458; found: 379.1458.

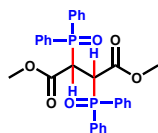

**dimethyl 2,3-bis(diphenylphosphoryl)succinate (35c):** white solid was obtained by column chromatography (eluent: EtOAc/petroleum ether = 2/1) with 34% isolated yield (92.8 mg). m. p. = 89–91 °C. <sup>1</sup>H NMR (500 MHz, CDCl<sub>3</sub>) δ 8.02 (dd, *J* = 11.4, 6.8 Hz, 4H), 7.64 (dd, *J* = 11.5, 7.3 Hz, 4H), 7.56 (m, 6H), 7.43 (t, *J* = 7.3 Hz, 2H), 7.35 (t, *J* = 7.3 Hz, 4H), 4.70 (d, *J* = 4.2 Hz, 2H), 2.91 (s, 6H). <sup>13</sup>C NMR (126 MHz, CDCl<sub>3</sub>) δ 168.2, 132.1 (d, *J*<sub>C-P</sub> = 15.0 Hz), 131.9 (d, *J*<sub>C-P</sub> = 115.2 Hz), 131.9 (t, *J*<sub>C-P</sub> = 4.8 Hz), 131.7 (d, *J*<sub>C-P</sub> = 115.3 Hz), 131.1 (t, *J*<sub>C-P</sub> = 4.8 Hz), 51.7, 48.4 (dt, *J*<sub>C-P</sub> = 44.4, 21.9 Hz). <sup>31</sup>P NMR (202 MHz, CDCl<sub>3</sub>) δ 29.7. HRMS (EI) calcd for C<sub>30</sub>H<sub>29</sub>O<sub>6</sub>P<sub>2</sub> [M + H]<sup>+</sup>: 547.1434; found: 547.1434.

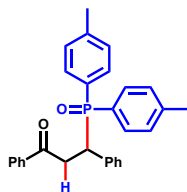

**3-(di-p-tolylphosphoryl)-1,3-diphenylpropan-1-one (36c):**<sup>2</sup> white solid was obtained by column chromatography (eluent: EtOAc/petroleum ether = 1/2) with 91% isolated yield (99.7 mg). <sup>1</sup>H NMR (500 MHz, CDCl<sub>3</sub>) δ 7.87 – 7.81 (m, 4H), 7.50 – 7.45 (m, 1H), 7.39 – 7.28 (m, 8H), 7.17 – 7.12 (m, 2H), 7.12 – 7.07 (m, 1H), 7.06 – 7.02 (m, 2H), 4.46 – 4.40 (m, 1H), 4.06 – 3.98 (m, 1H), 3.42 – 3.34 (m, 1H), 2.37 (s, 3H), 2.26 (s, 3H). <sup>13</sup>C NMR (126 MHz, CDCl<sub>3</sub>) δ 196.8 (d, *J*<sub>C-P</sub> = 13.3 Hz), 142.5 (d, *J*<sub>C-P</sub> = 2.7 Hz), 141.8 (d, *J*<sub>C-P</sub> = 2.9 Hz), 136.4, 136.0 (d, *J*<sub>C-P</sub> = 5.7 Hz), 133.2, 131.2 (d, *J*<sub>C-P</sub> = 8.9 Hz), 131.0 (d, *J*<sub>C-P</sub> = 9.3 Hz), 129.8 (d, *J*<sub>C-P</sub> = 5.6 Hz), 129.6 (d, *J*<sub>C-P</sub> = 11.7 Hz), 128.8 (d, *J*<sub>C-P</sub> = 12.3 Hz), 128.5, 128.3 (d,

$J_{C-P} = 103.6$  Hz), 128.2 (d,  $J_{C-P} = 1.9$  Hz), 128.1, 128.0 (d,  $J_{C-P} = 97.6$  Hz), 126.9 (d,  $J_{C-P} = 2.5$  Hz), 41.2 (d,  $J_{C-P} = 69.2$  Hz), 41.2 (d,  $J_{C-P} = 69.2$  Hz), 39.0, 21.5 (d,  $J_{C-P} = 10.4$  Hz).  $^{31}\text{P}$  NMR (202 MHz,  $\text{CDCl}_3$ )  $\delta$  35.0.

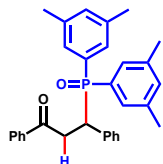

**3-(bis(3,5-dimethylphenyl)phosphoryl)-1,3-diphenylpropan-1-one (37c):** yellow oil was obtained by column chromatography (eluent: EtOAc/petroleum ether = 1/2) with 88% isolated yield (102.6 mg).  $^1\text{H}$  NMR (500 MHz,  $\text{CDCl}_3$ )  $\delta$  7.89 – 7.83 (m, 2H), 7.56 (dd,  $J = 11.2, 1.6$  Hz, 2H), 7.50 – 7.45 (m, 1H), 7.40 – 7.34 (m, 4H), 7.17 – 7.11 (m, 3H), 7.09 (dd,  $J = 7.3, 1.7$  Hz, 1H), 7.05 (dd,  $J = 11.6, 1.5$  Hz, 2H), 6.95 (s, 1H), 4.46 – 4.39 (m, 1H), 4.08 – 4.00 (m, 1H), 3.43 – 3.34 (m, 1H), 2.34 (s, 6H), 2.17 (s, 6H).  $^{13}\text{C}$  NMR (126 MHz,  $\text{CDCl}_3$ )  $\delta$  196.9 (d,  $J_{C-P} = 13.2$  Hz), 138.6 (d,  $J_{C-P} = 12.1$  Hz), 137.6 (d,  $J_{C-P} = 12.6$  Hz), 136.4, 136.0 (d,  $J_{C-P} = 5.8$  Hz), 133.8 (d,  $J_{C-P} = 2.8$  Hz), 133.2, 133.2 (d,  $J_{C-P} = 2.9$  Hz), 130.8 (d,  $J_{C-P} = 100.6$  Hz), 130.6 (d,  $J_{C-P} = 94.4$  Hz), 129.9 (d,  $J_{C-P} = 5.5$  Hz), 128.8 (d,  $J_{C-P} = 8.7$  Hz), 128.6 (d,  $J_{C-P} = 9.0$  Hz), 128.5, 128.2 (d,  $J_{C-P} = 1.9$  Hz), 128.1, 126.9 (d,  $J_{C-P} = 2.4$  Hz), 41.1 (d,  $J_{C-P} = 68.5$  Hz), 38.8, 21.2 (d,  $J_{C-P} = 28.3$  Hz).  $^{31}\text{P}$  NMR (202 MHz,  $\text{CDCl}_3$ )  $\delta$  35.6. HRMS (EI) calcd for  $\text{C}_{31}\text{H}_{32}\text{O}_2\text{P}$  [ $\text{M} + \text{H}$ ] $^+$ : 467.2134; found: 467.2135.

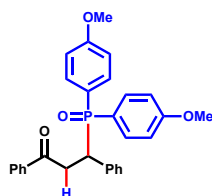

**3-(bis(4-methoxyphenyl)phosphoryl)-1,3-diphenylpropan-1-one (38c):**<sup>2</sup> white solid was obtained by column chromatography (eluent: EtOAc/petroleum ether = 2/1) with 90% isolated yield (105.8 mg).  $^1\text{H}$  NMR (500 MHz,  $\text{CDCl}_3$ )  $\delta$  7.91 – 7.82 (m, 4H), 7.50 – 7.46 (m, 1H), 7.39 – 7.30 (m, 6H), 7.18 – 7.13 (m, 2H), 7.12 – 7.08 (m, 1H), 7.02 – 6.99 (m, 2H), 6.76 – 6.72 (m, 2H), 4.42 – 4.36 (m, 1H), 4.05 – 3.97 (m, 1H), 3.81 (s, 3H), 3.72 (s, 3H), 3.45 – 3.37 (m, 1H).  $^{13}\text{C}$  NMR (126 MHz,  $\text{CDCl}_3$ )  $\delta$  196.8 (d,  $J_{C-P} = 13.2$  Hz), 162.5 (d,  $J_{C-P} = 2.8$  Hz), 162.0 (d,  $J_{C-P} = 2.8$  Hz), 136.4, 136.0 (d,  $J_{C-P} = 5.7$  Hz), 133.2, 133.1 (d,  $J_{C-P} = 9.9$  Hz), 132.8 (d,  $J_{C-P} = 10.4$  Hz), 129.8 (d,  $J_{C-P} = 5.6$  Hz), 128.5, 128.3 (d,  $J_{C-P} = 1.8$  Hz), 128.1, 127.0 (d,  $J_{C-P} = 2.6$  Hz), 122.6 (d,  $J_{C-P} = 108.1$  Hz), 122.0 (d,  $J_{C-P} = 102.0$  Hz), 114.5 (d,  $J_{C-P} = 12.3$  Hz), 113.6 (d,  $J_{C-P} = 12.9$  Hz), 55.2 (d,  $J_{C-P} = 18.5$  Hz), 41.5 (d,  $J_{C-P} = 69.9$  Hz), 38.9.  $^{31}\text{P}$  NMR (202 MHz,  $\text{CDCl}_3$ )  $\delta$  34.6.

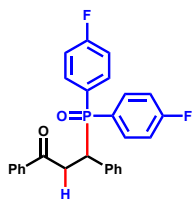

**3-(bis(4-fluorophenyl)phosphoryl)-1,3-diphenylpropan-1-one (39c):** white solid was obtained by column chromatography (eluent: EtOAc/petroleum ether = 1/2) with 64% isolated yield (71.4 mg). m. p. = 194-196 °C.  $^1\text{H}$  NMR (500 MHz,  $\text{CDCl}_3$ )  $\delta$  8.00 – 7.94 (m, 2H), 7.86 – 7.82 (m, 2H), 7.53 – 7.48 (m, 1H), 7.46 – 7.34 (m, 6H), 7.23 – 7.12 (m, 5H), 6.98 – 6.90 (m, 2H), 4.48 – 4.41 (m, 1H), 4.02 – 3.93 (m, 1H), 3.44 – 3.36 (m, 1H).  $^{13}\text{C}$  NMR (126 MHz,  $\text{CDCl}_3$ )  $\delta$  196.4 (d,  $J_{\text{C-P}} = 12.8$  Hz), 164.9 (dd,  $J_{\text{C-F}}, \text{C-P} = 250.5, 62.7$  Hz), 136.2, 135.6 (d,  $J_{\text{C-P}} = 5.7$  Hz), 133.9 (dd,  $J_{\text{C-P}}, \text{C-F} = 10.7, 9.4$  Hz), 133.4 (dd,  $J_{\text{C-P}}, \text{C-F} = 10.8, 9.5$  Hz), 129.7 (d,  $J_{\text{C-P}} = 5.8$  Hz), 128., 128.4 (d,  $J_{\text{C-P}} = 1.9$  Hz), 128.0, 127.3 (d,  $J_{\text{C-P}} = 2.5$  Hz), 127.2 (dd,  $J_{\text{C-P}}, \text{C-F} = 100.5, 51.5$  Hz), 127.2 (dd,  $J_{\text{C-P}}, \text{C-F} = 101.0, 51.5$  Hz), 116.4 (dd,  $J_{\text{C-P}}, \text{C-F} = 21.4, 12.3$  Hz), 115.5 (dd,  $J_{\text{C-P}}, \text{C-F} = 21.4, 12.9$  Hz), 41.2 (d,  $J_{\text{C-P}} = 70.2$  Hz), 38.9.  $^{19}\text{F}$  NMR (471 MHz,  $\text{CDCl}_3$ )  $\delta$  -106.1, -106.9.  $^{31}\text{P}$  NMR (202 MHz,  $\text{CDCl}_3$ )  $\delta$  33.4. HRMS (EI) calcd for  $\text{C}_{27}\text{H}_{22}\text{F}_2\text{O}_2\text{P}$   $[\text{M} + \text{H}]^+$ : 447.1320; found: 447.1315.

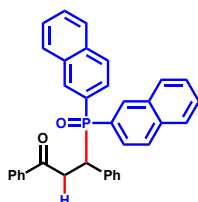

**3-(di(naphthalen-2-yl)phosphoryl)-1,3-diphenylpropan-1-one (40c):<sup>2</sup>** white solid was obtained by column chromatography (eluent: EtOAc/petroleum ether = 1/2) with 88% isolated yield (112.2 mg).  $^1\text{H}$  NMR (500 MHz,  $\text{CDCl}_3$ )  $\delta$  8.68 (d,  $J = 12.7$  Hz, 1H), 8.12 (dd,  $J = 13.3, 1.4$  Hz, 1H), 8.00 – 7.93 (m, 3H), 7.86 – 7.79 (m, 3H), 7.75 – 7.68 (m, 3H), 7.59 – 7.51 (m, 3H), 7.50 – 7.45 (m, 3H), 7.45 – 7.38 (m, 2H), 7.30 (t,  $J = 7.8$  Hz, 2H), 7.13 (t,  $J = 7.5$  Hz, 2H), 7.09 – 7.03 (m, 1H), 4.77 – 4.70 (m, 1H), 4.16 – 4.06 (m, 1H), 3.53 – 3.44 (m, 1H).  $^{13}\text{C}$  NMR (126 MHz,  $\text{CDCl}_3$ )  $\delta$  196.7 (d,  $J_{\text{C-P}} = 13.2$  Hz), 136.3, 135.8 (d,  $J_{\text{C-P}} = 5.6$  Hz), 134.7 (d,  $J_{\text{C-P}} = 2.2$  Hz), 134.4 (d,  $J_{\text{C-P}} = 2.3$  Hz), 133.8 (d,  $J_{\text{C-P}} = 7.6$  Hz), 133.4 (d,  $J_{\text{C-P}} = 8.3$  Hz), 133.3, 132.7 (d,  $J_{\text{C-P}} = 12.4$  Hz), 132.2 (d,  $J_{\text{C-P}} = 12.9$  Hz), 129.9 (d,  $J_{\text{C-P}} = 5.7$  Hz), 129.1 (d,  $J_{\text{C-P}} = 109.7$  Hz), 129.0 (d,  $J_{\text{C-P}} = 10.6$  Hz), 128.8, 128.6 (d,  $J_{\text{C-P}} = 97.4$  Hz), 128.5, 128.4 (d,  $J_{\text{C-P}} = 1.6$  Hz), 128.3, 128.1, 128.0 (d,  $J_{\text{C-P}} = 7.3$  Hz), 127.8 (d,  $J_{\text{C-P}} = 5.5$  Hz), 127.6, 127.2 (d,  $J_{\text{C-P}} = 2.4$  Hz), 127.1, 126.6, 125.7 (d,  $J_{\text{C-P}} = 3.4$  Hz), 125.6 (d,  $J_{\text{C-P}} = 3.2$  Hz), 41.0 (d,  $J_{\text{C-P}} = 69.3$  Hz), 39.0.  $^{31}\text{P}$  NMR (202 MHz,  $\text{CDCl}_3$ )  $\delta$  34.6.

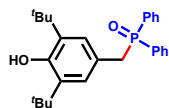

**(3,5-di-tert-butyl-4-hydroxybenzyl)diphenylphosphine oxide (42c):**<sup>2</sup> white solid was obtained by column chromatography (eluent: EtOAc/petroleum ether = 1/2) with 48% isolated yield (50.4 mg). <sup>1</sup>H NMR (500 MHz, CDCl<sub>3</sub>) δ 7.69 – 7.64 (m, 4H), 7.52 – 7.47 (m, 2H), 7.44 – 7.39 (m, 4H), 6.74 (d, *J* = 2.2 Hz, 2H), 5.11 (s, 1H), 3.57 (d, *J* = 13.8 Hz, 2H), 1.28 (s, 18H). <sup>13</sup>C NMR (126 MHz, CDCl<sub>3</sub>) δ 152.7 (d, *J*<sub>C-P</sub> = 3.5 Hz), 135.8 (d, *J*<sub>C-P</sub> = 2.8 Hz), 132.4 (d, *J*<sub>C-P</sub> = 97.9 Hz), 131.6 (d, *J*<sub>C-P</sub> = 2.8 Hz), 131.4 (d, *J*<sub>C-P</sub> = 9.0 Hz), 128.3 (d, *J*<sub>C-P</sub> = 11.5 Hz), 126.9 (d, *J*<sub>C-P</sub> = 5.1 Hz), 121.2 (d, *J*<sub>C-P</sub> = 7.8 Hz), 38.1 (d, *J*<sub>C-P</sub> = 67.3 Hz), 34.1, 30.1.

## 7. Copies of product NMR Spectra

1c

### <sup>1</sup>H NMR

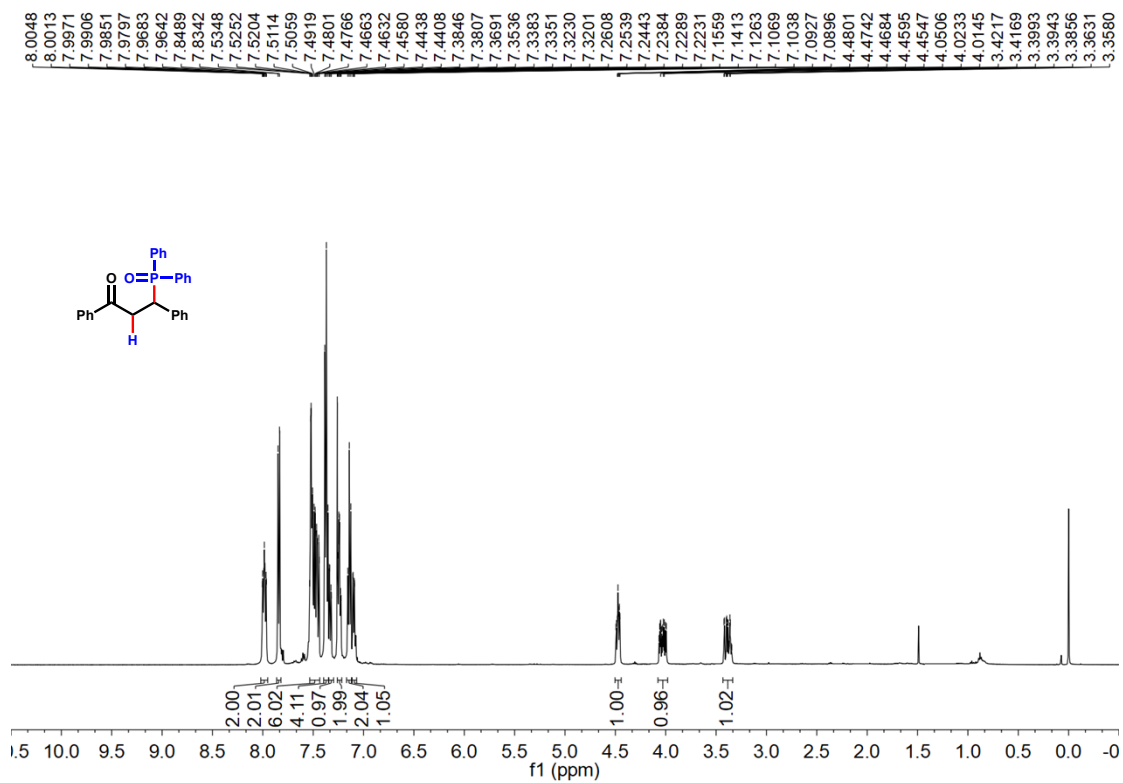

### <sup>13</sup>C NMR

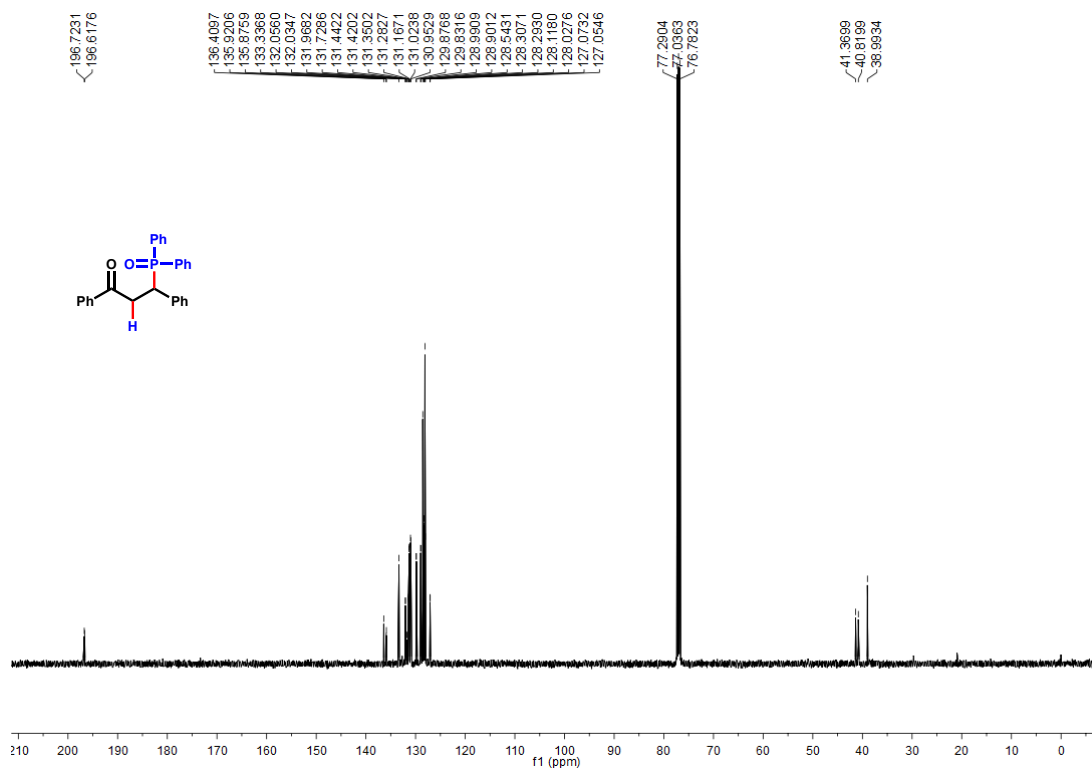

### <sup>31</sup>P NMR

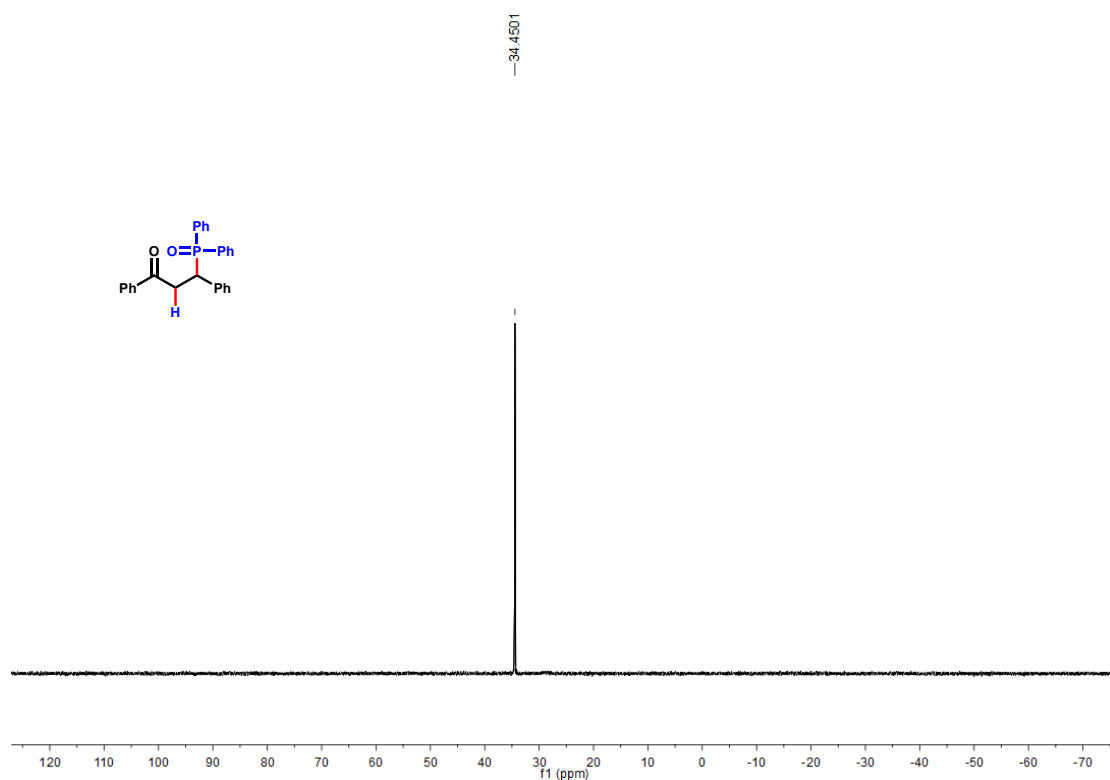

2c

### <sup>1</sup>H NMR

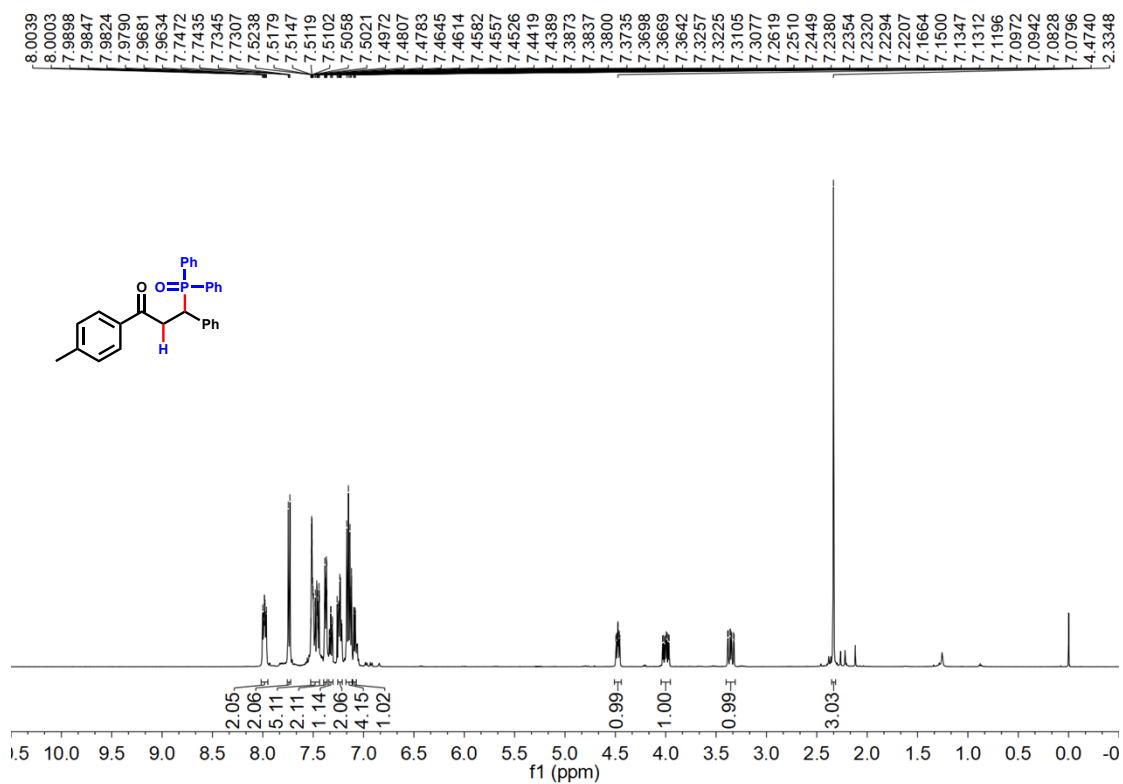



### <sup>13</sup>C NMR

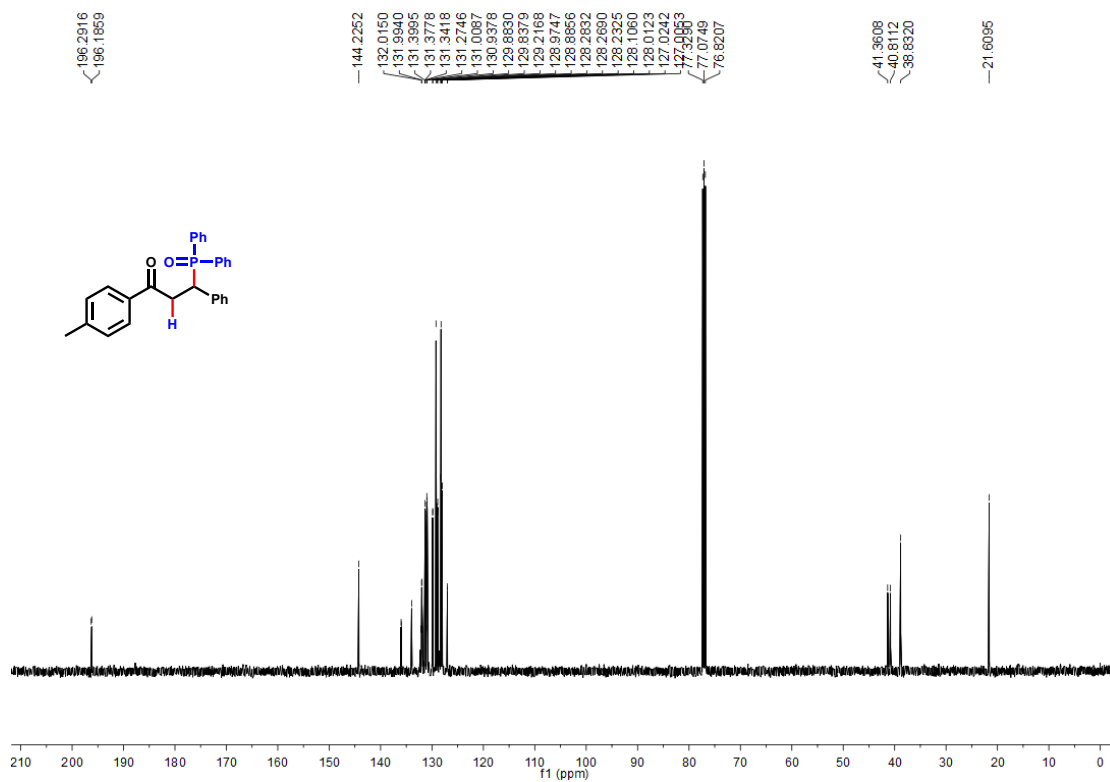

### <sup>31</sup>P NMR

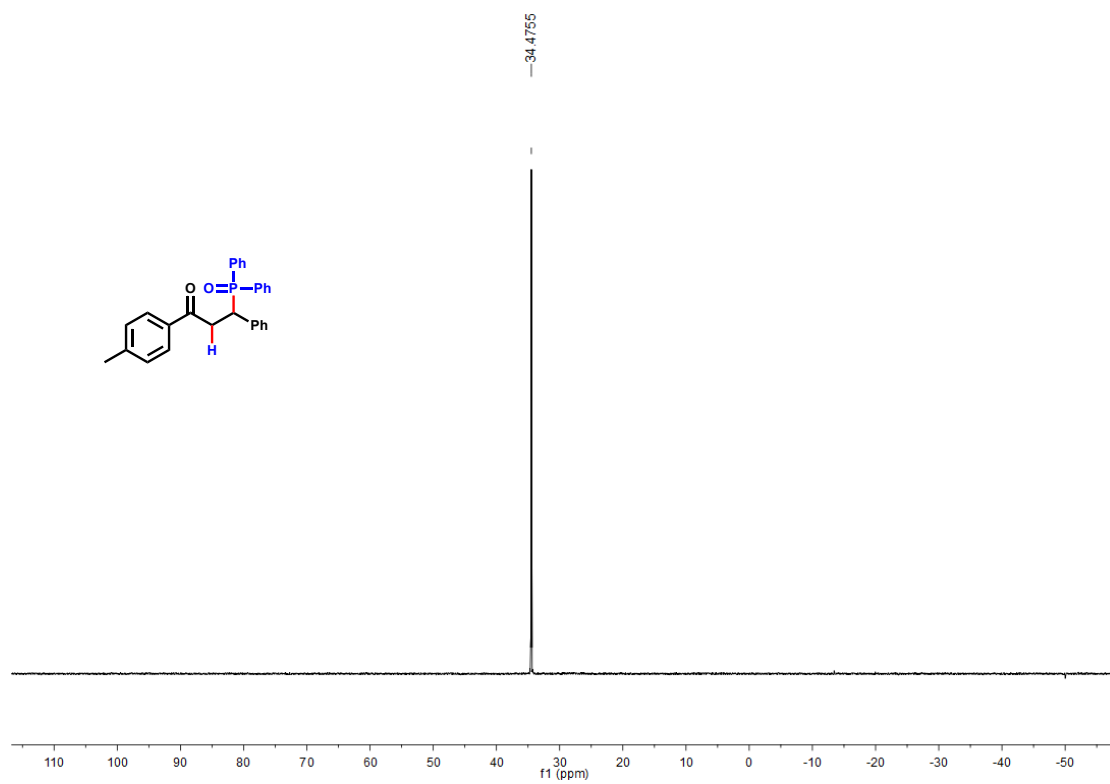

3c

### <sup>1</sup>H NMR

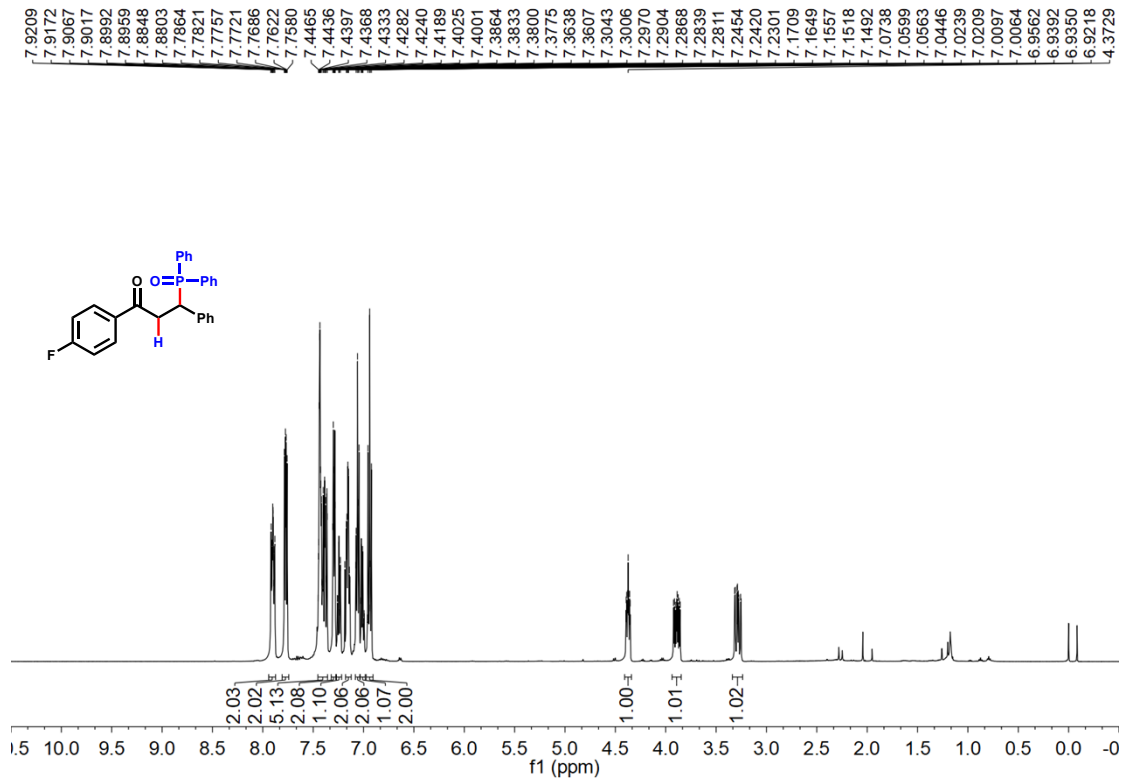

<sup>13</sup>C NMR

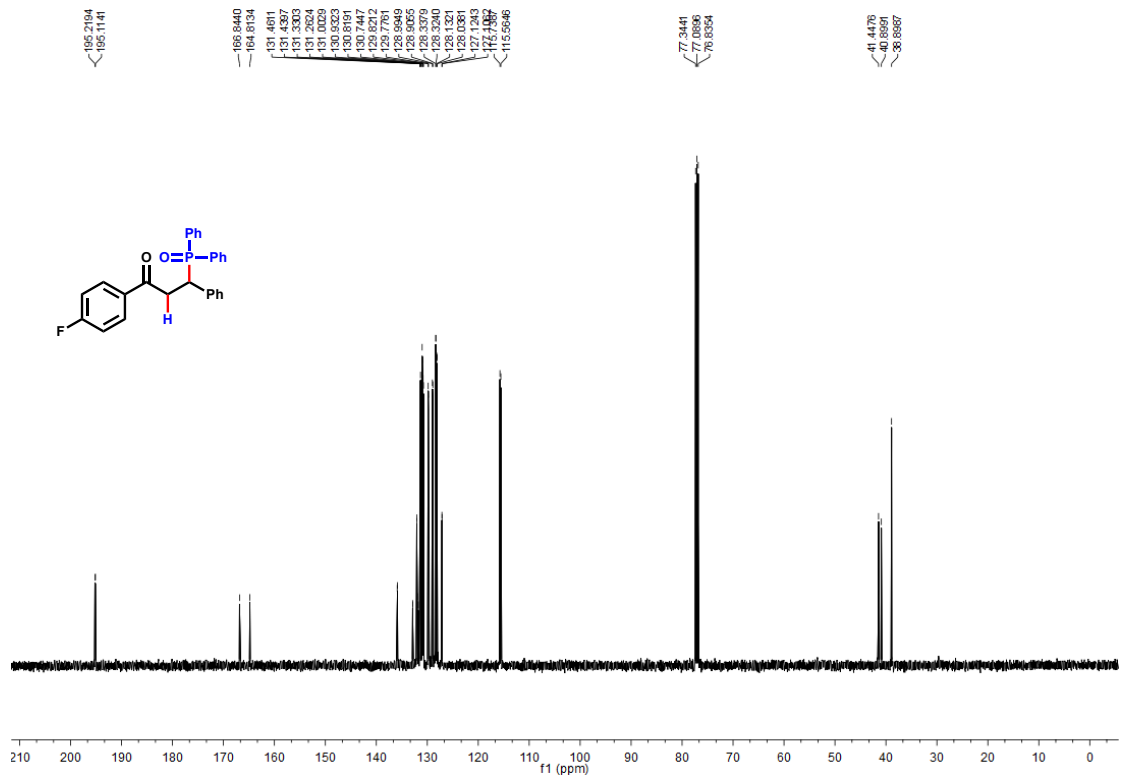

<sup>31</sup>P NMR

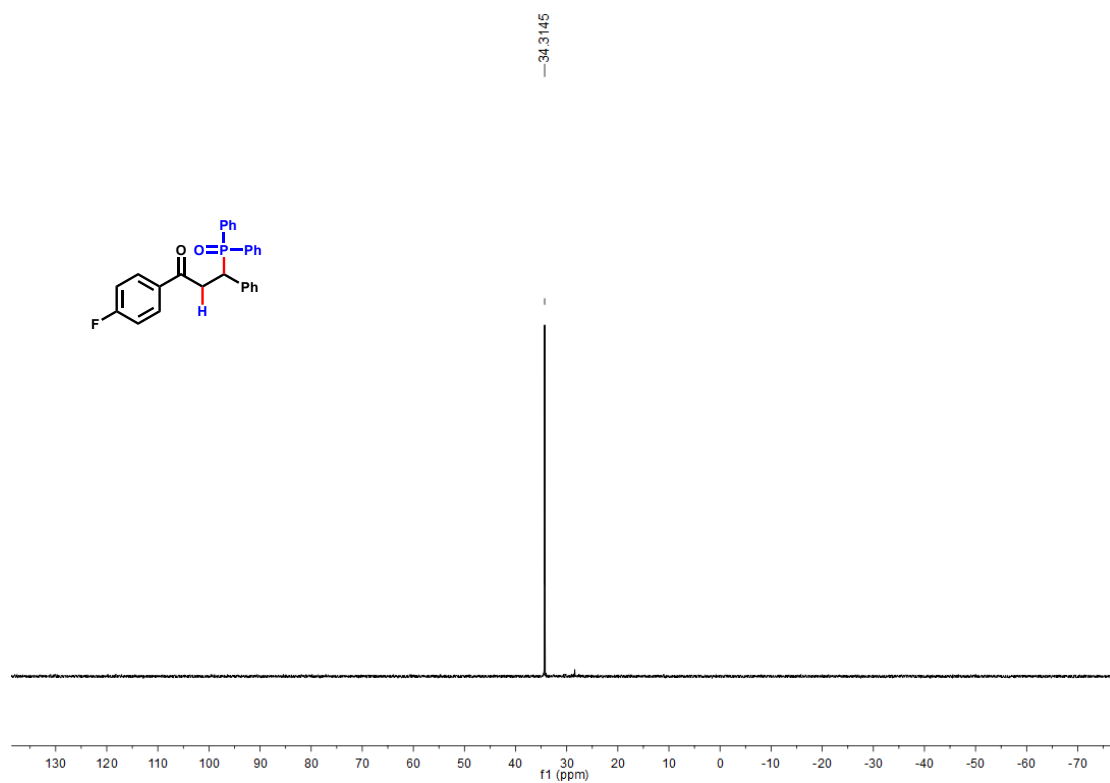

4c

**<sup>1</sup>H NMR**

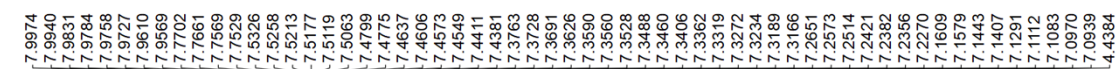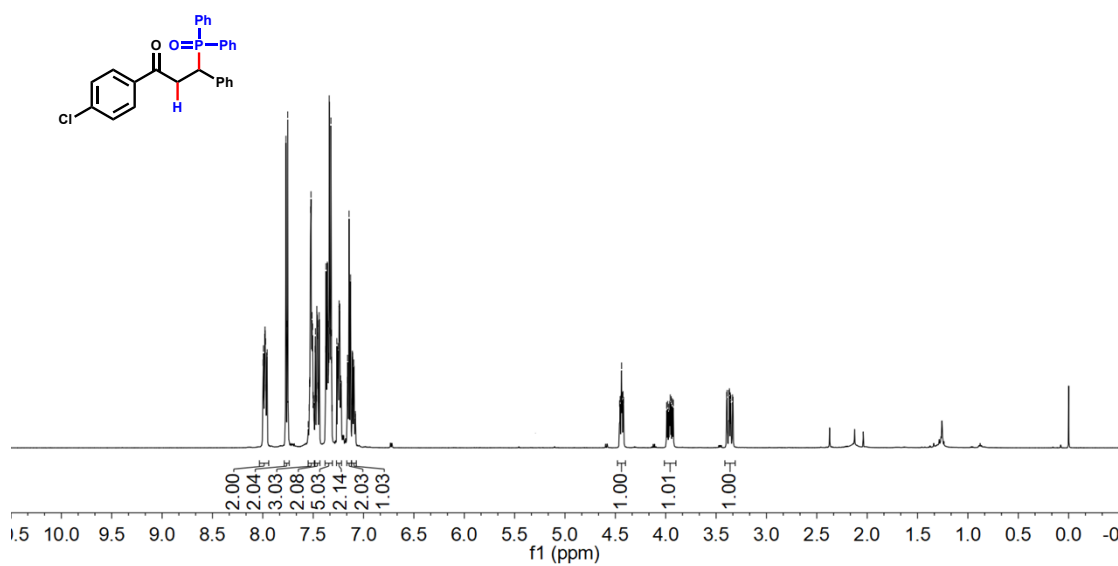

**<sup>13</sup>C NMR**

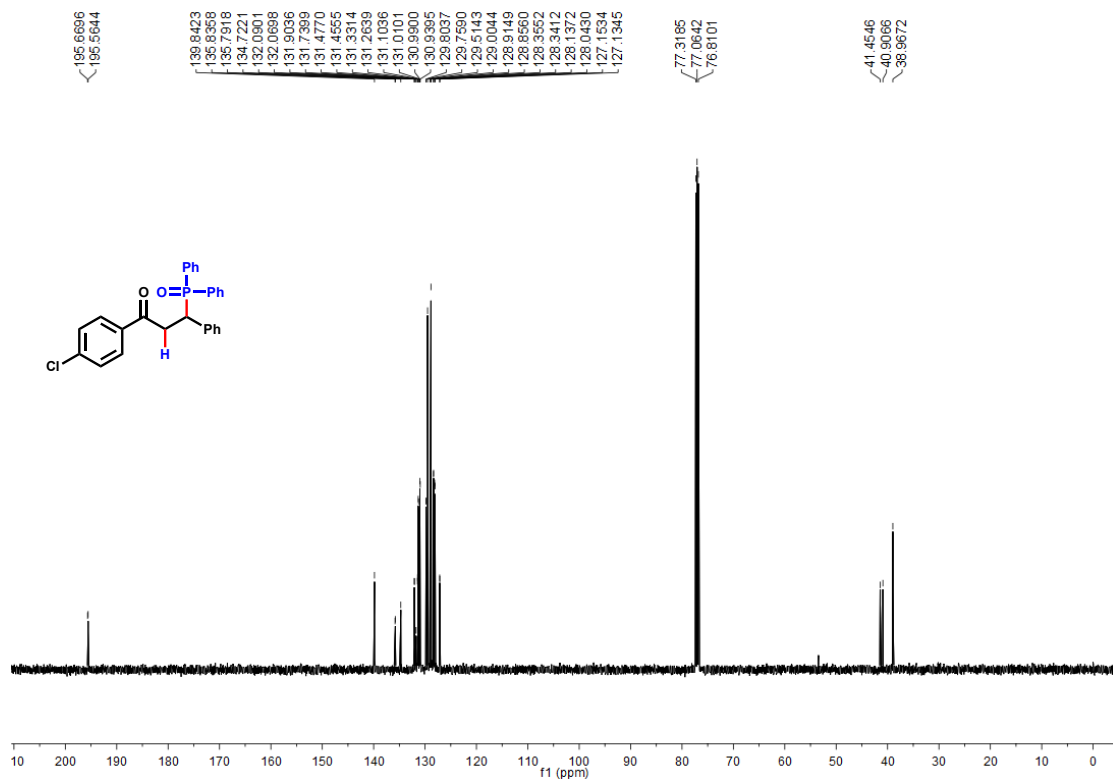

**<sup>31</sup>P NMR**

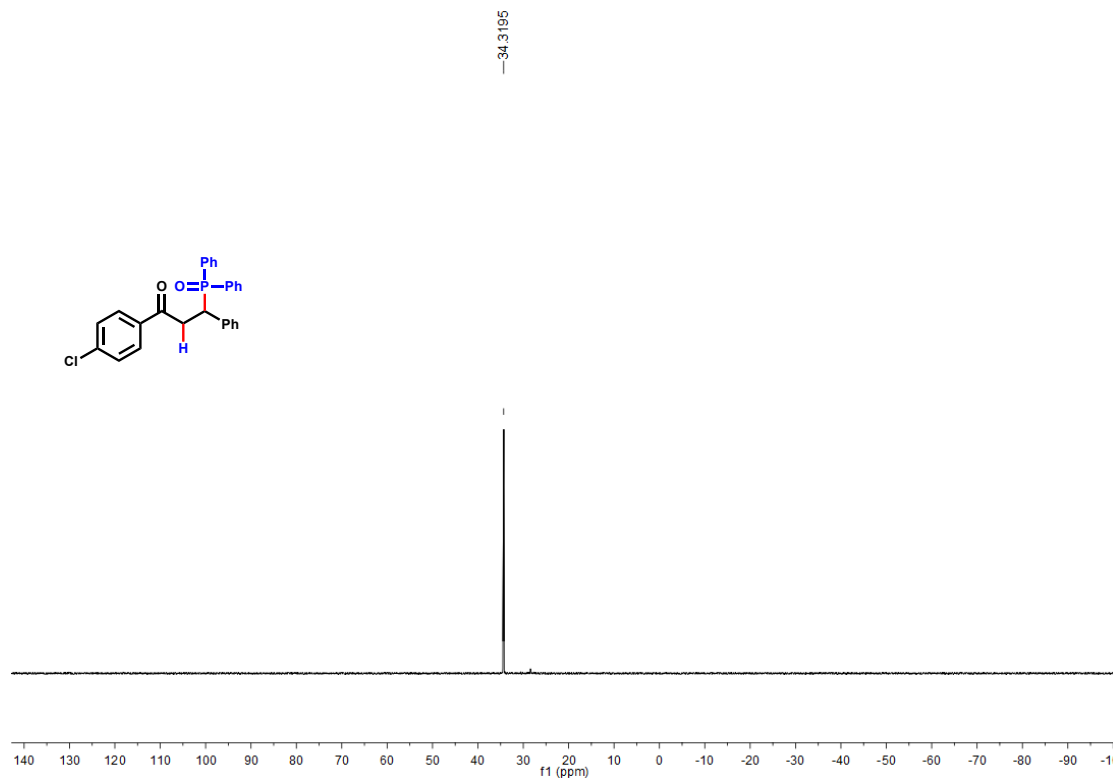

**5c**

**<sup>1</sup>H NMR**

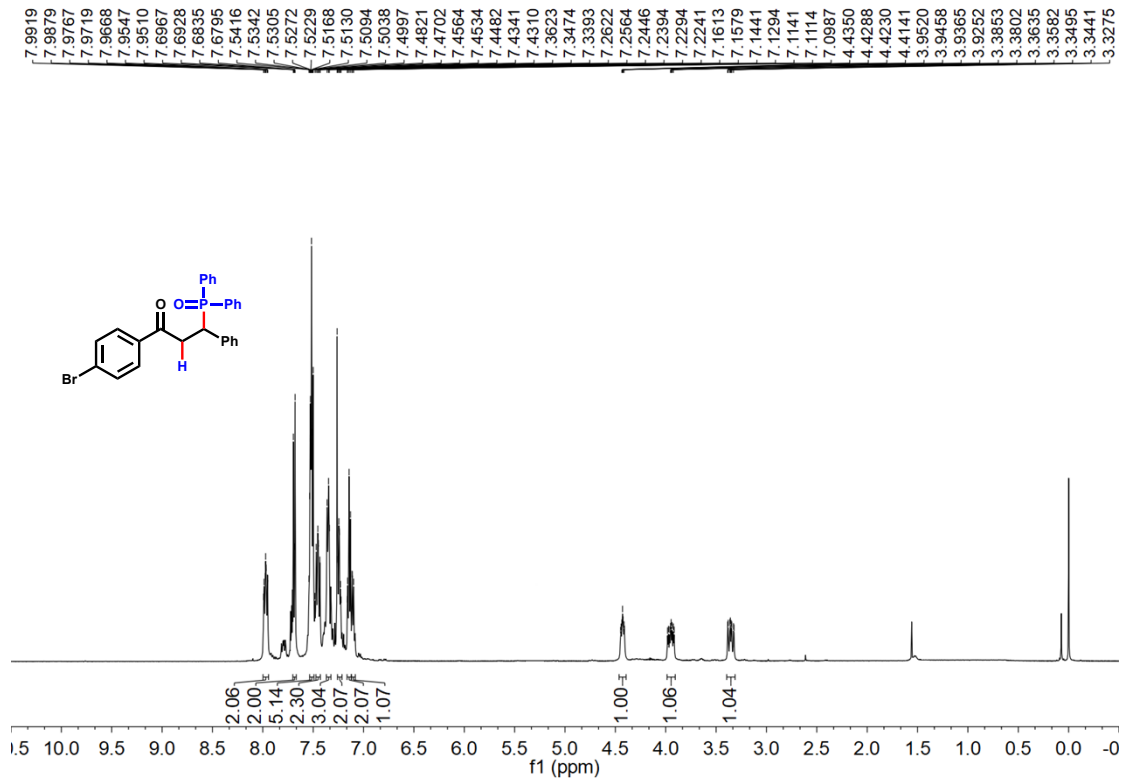

### 13C NMR

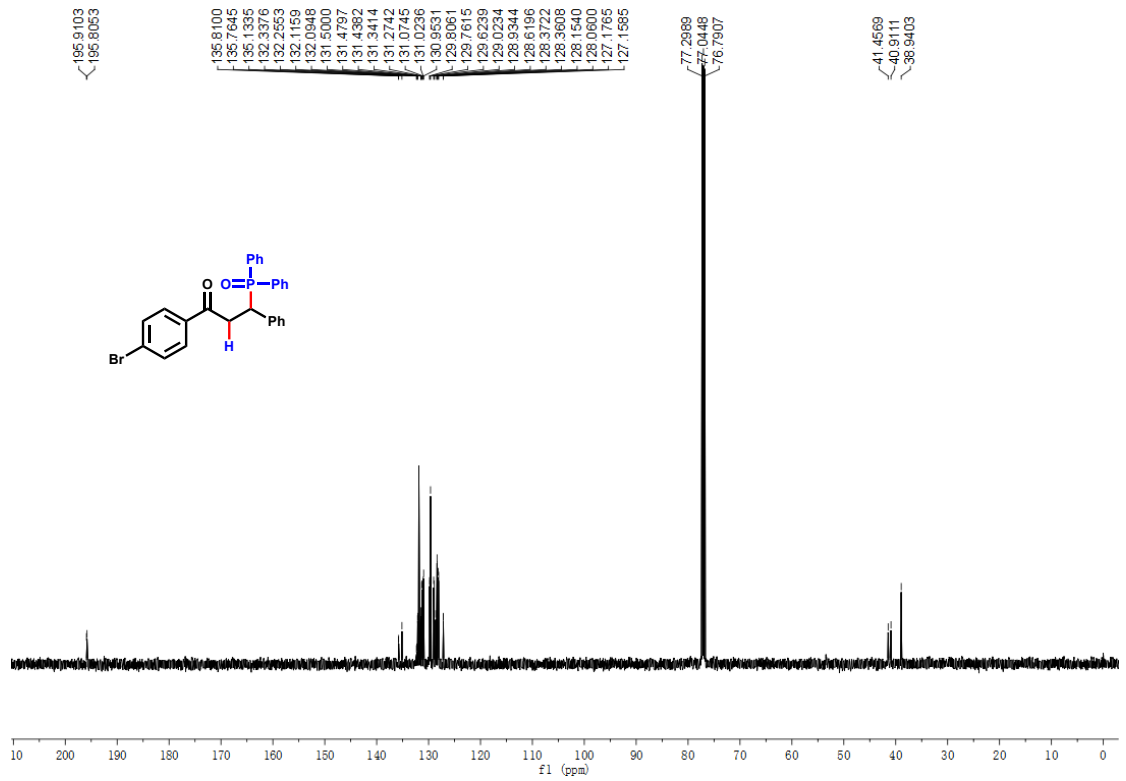

### 31P NMR

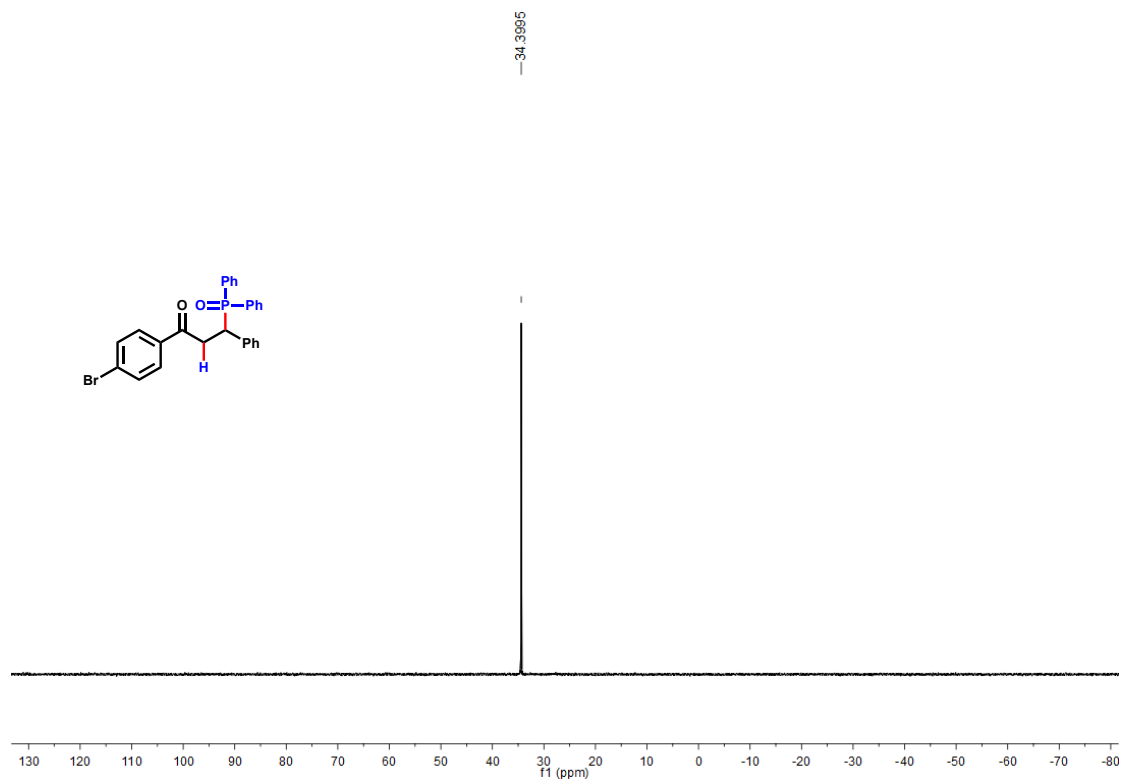

6c

<sup>1</sup>H NMR

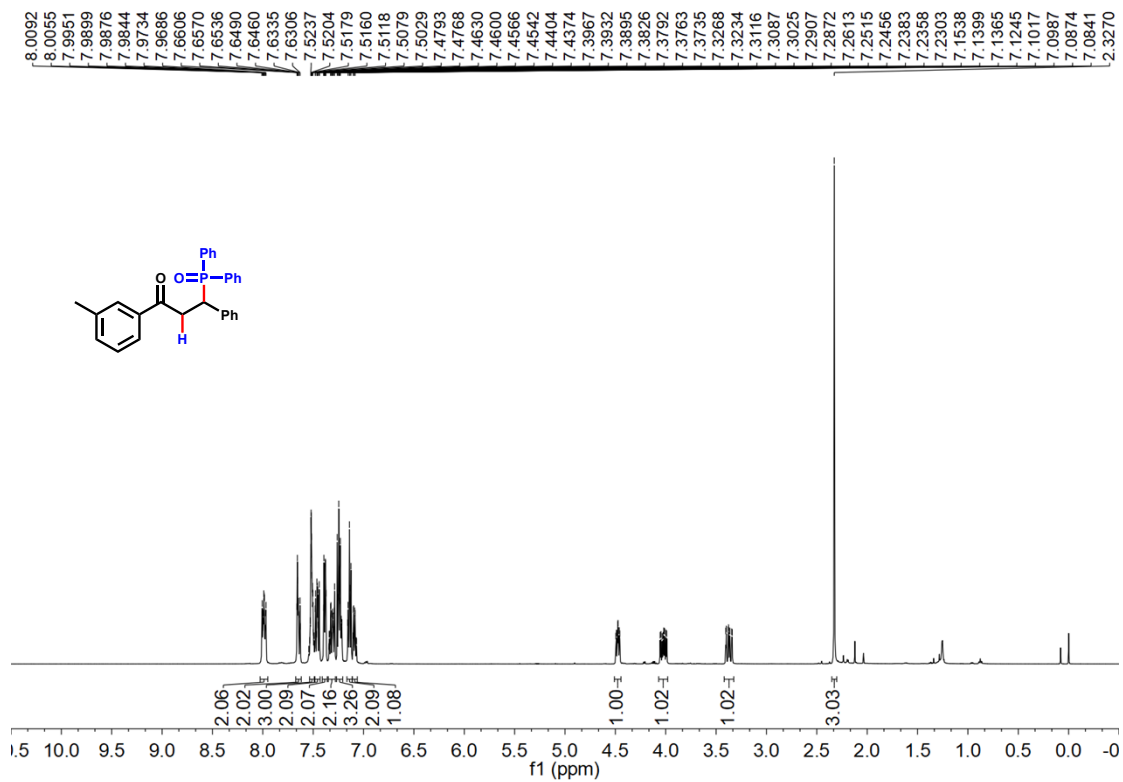

### <sup>13</sup>C NMR

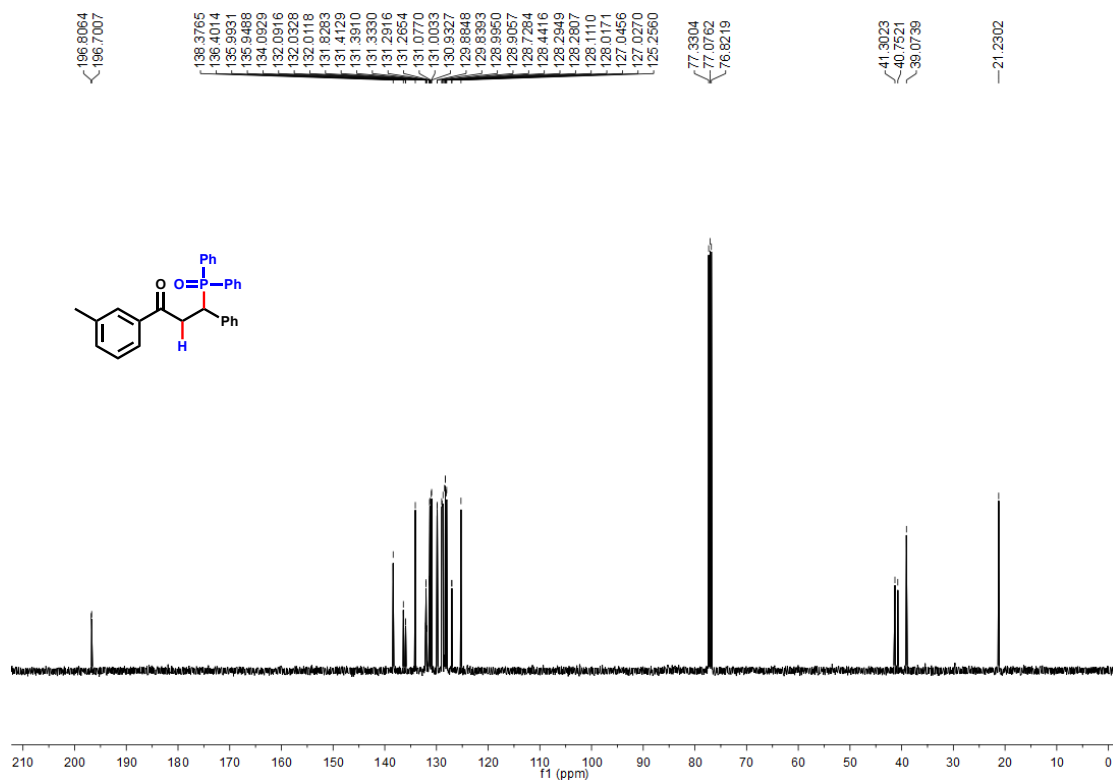

### <sup>31</sup>P NMR

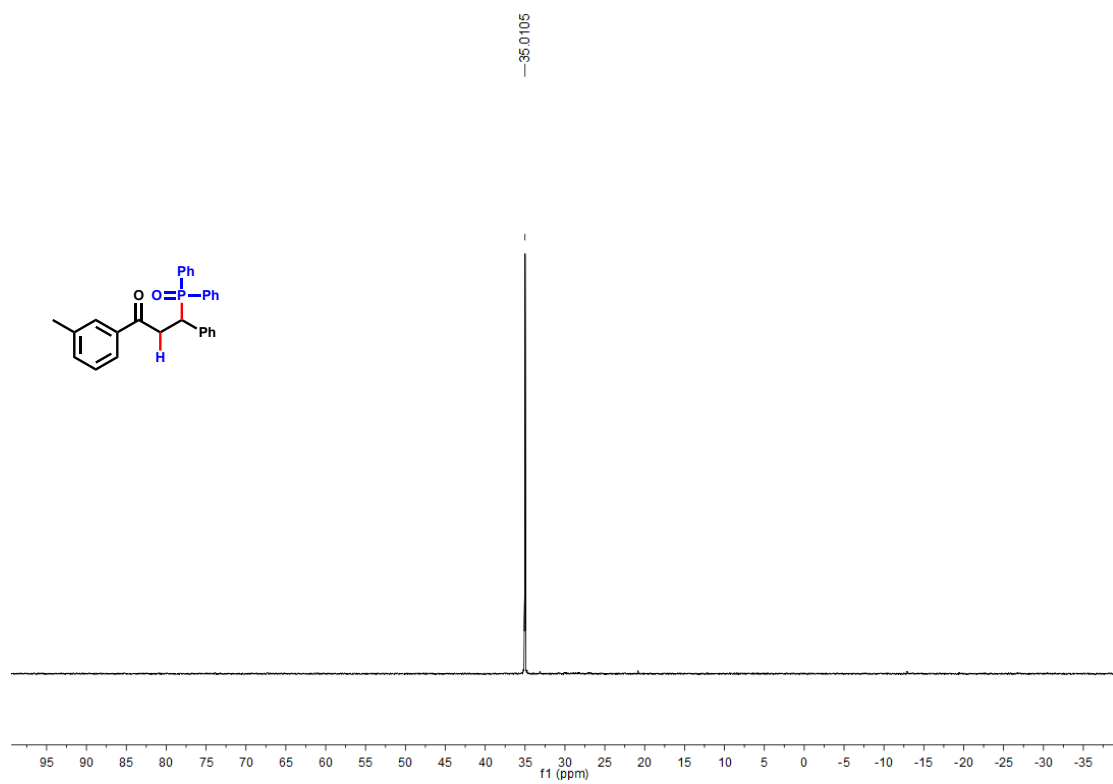

7c

<sup>1</sup>H NMR

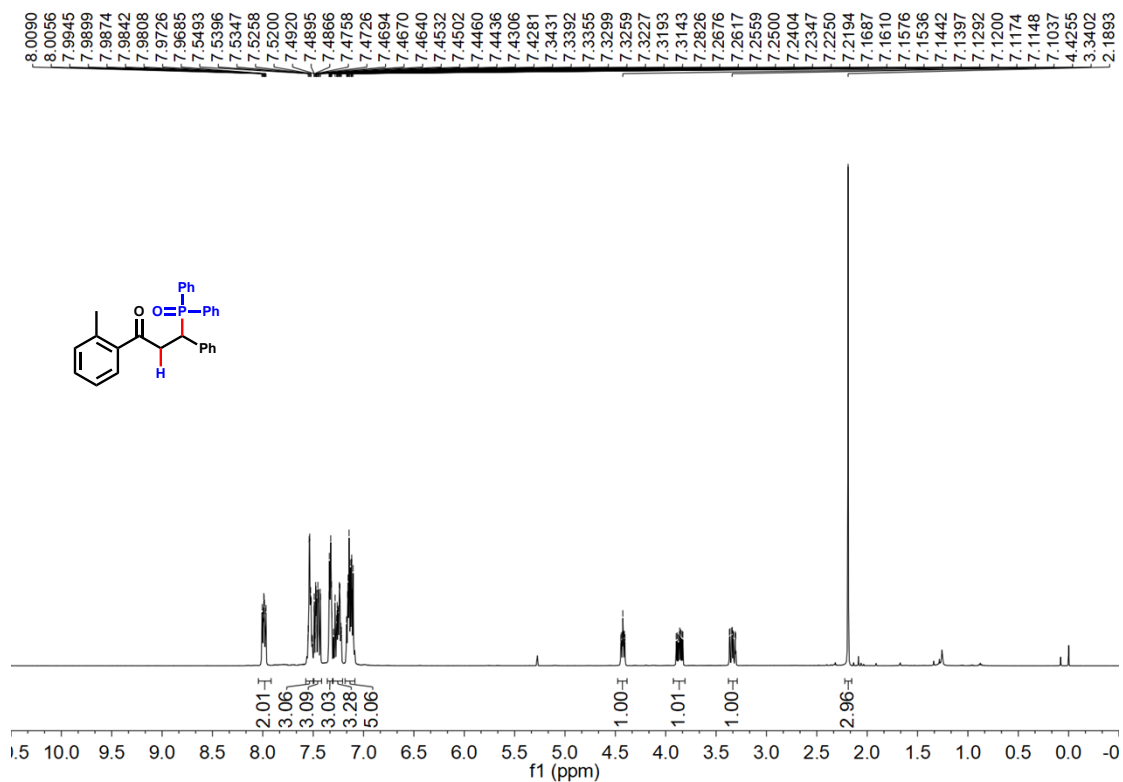

<sup>13</sup>C NMR

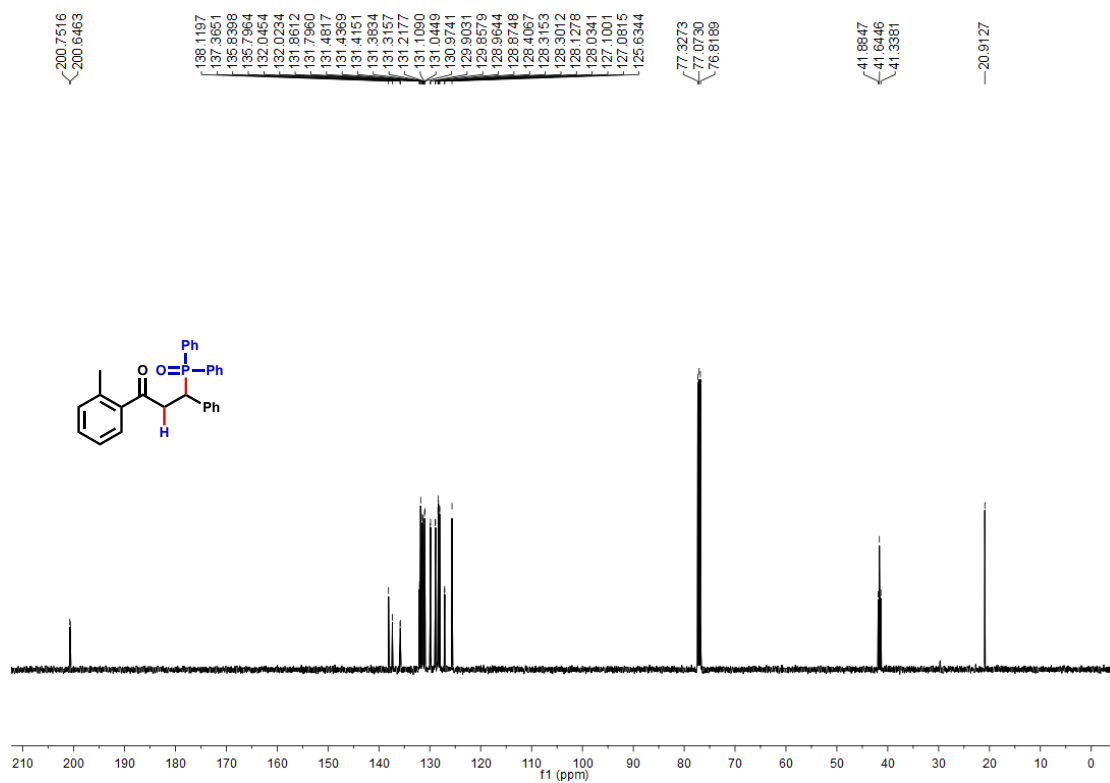



**<sup>31</sup>P NMR**

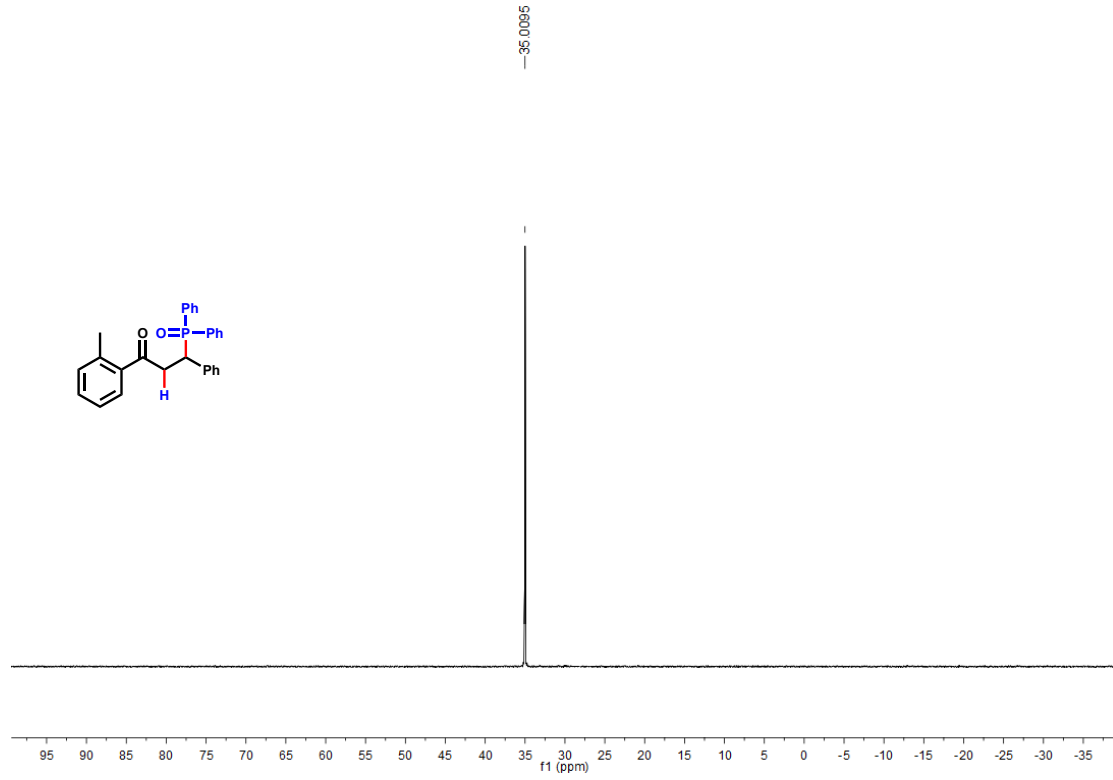

**8c**

**<sup>1</sup>H NMR**

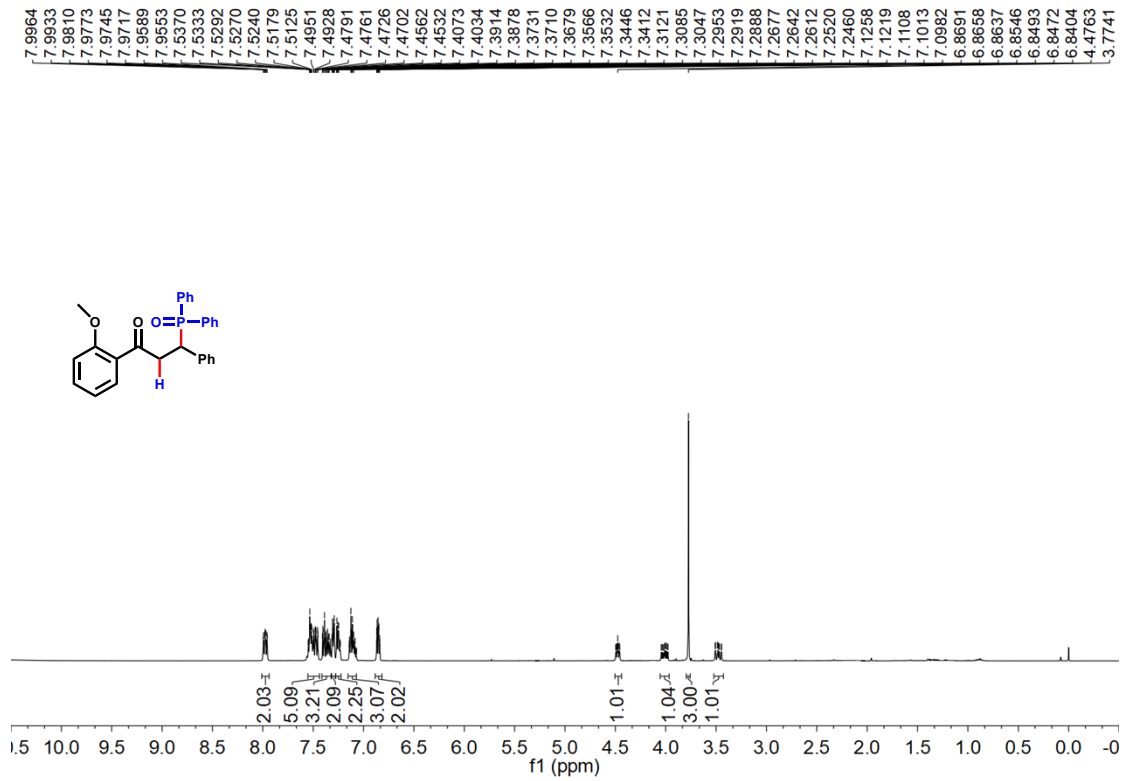

### <sup>13</sup>C NMR

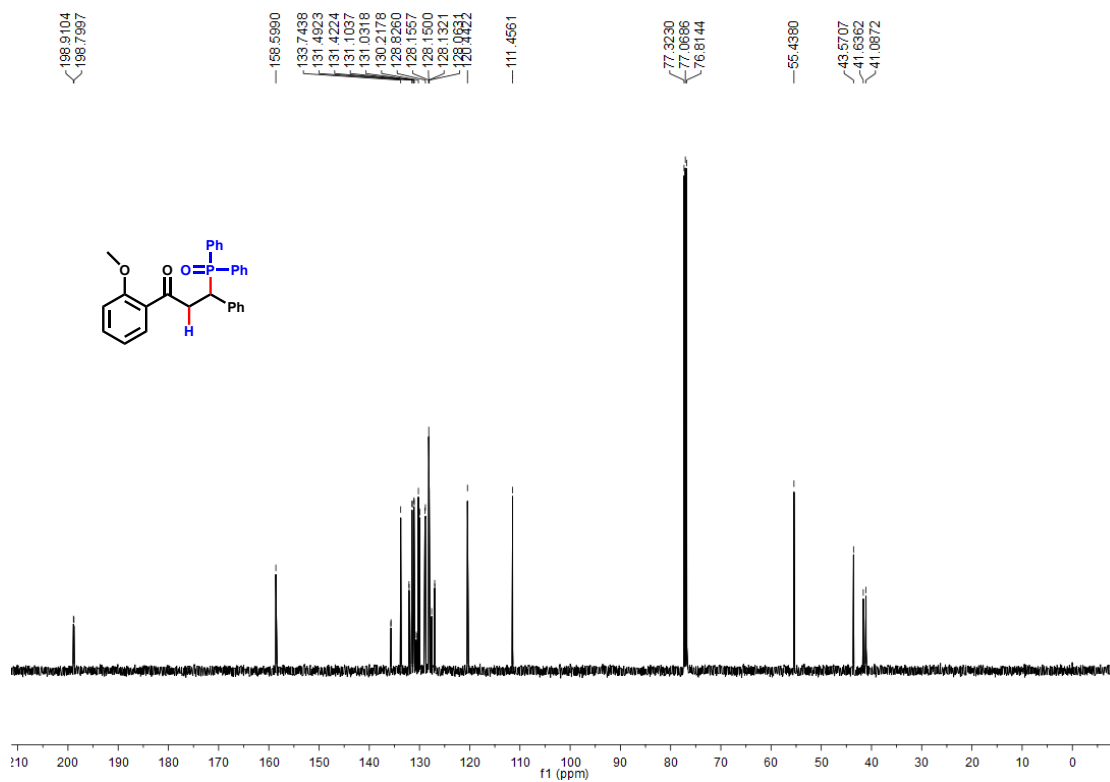

### <sup>31</sup>P NMR

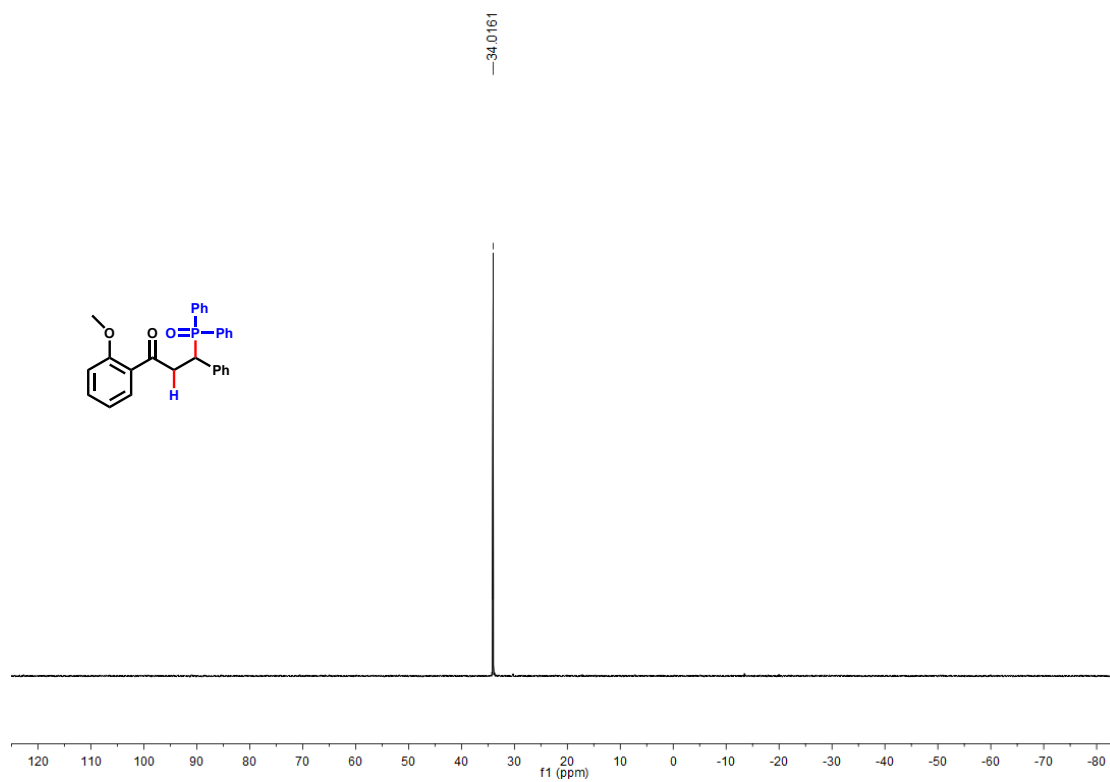

9c

<sup>1</sup>H NMR

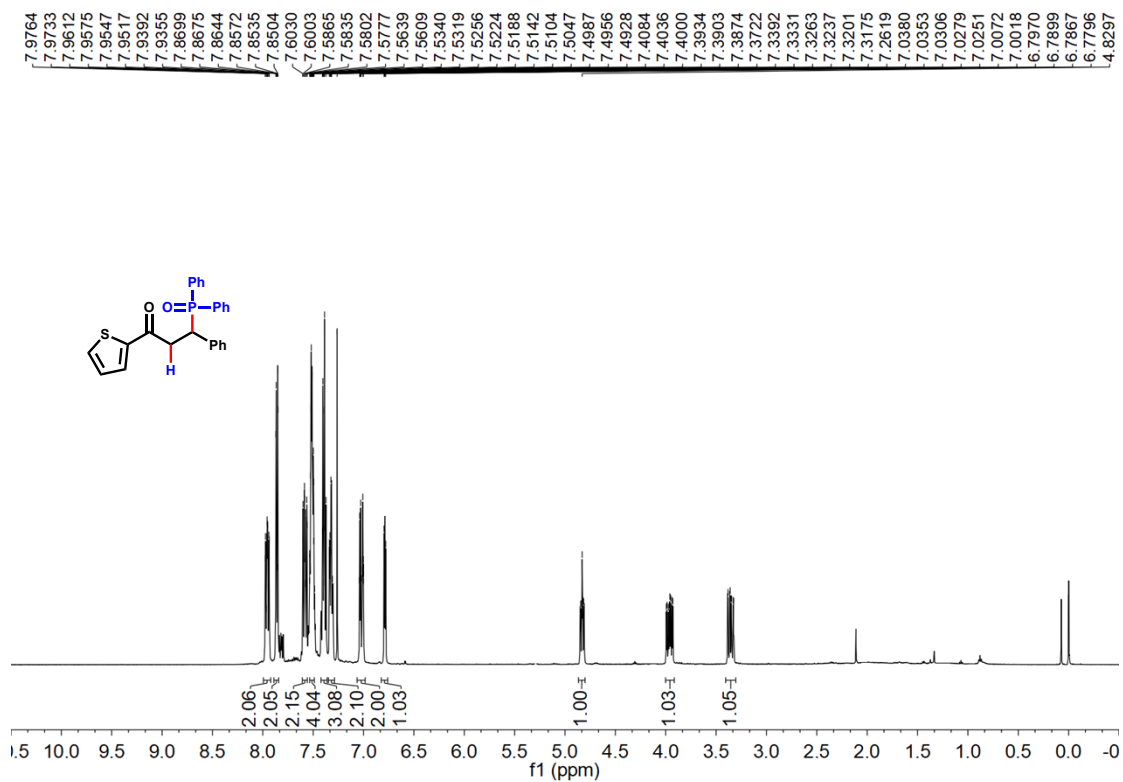

<sup>13</sup>C NMR

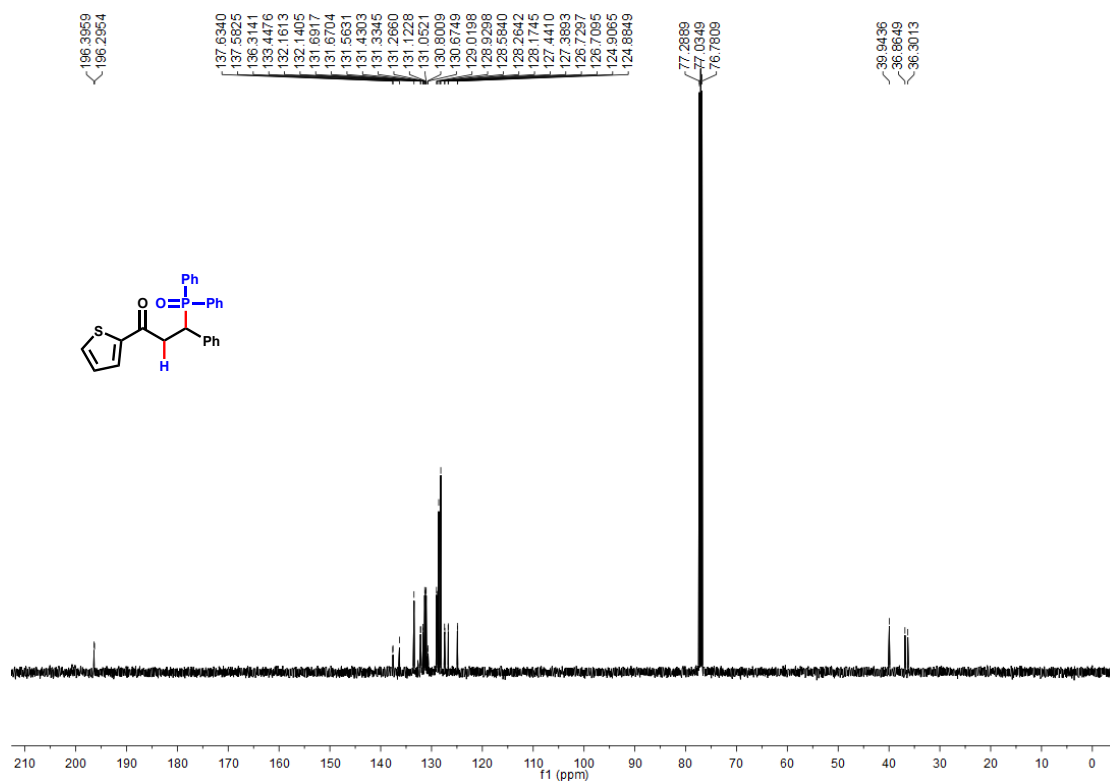

### <sup>31</sup>P NMR

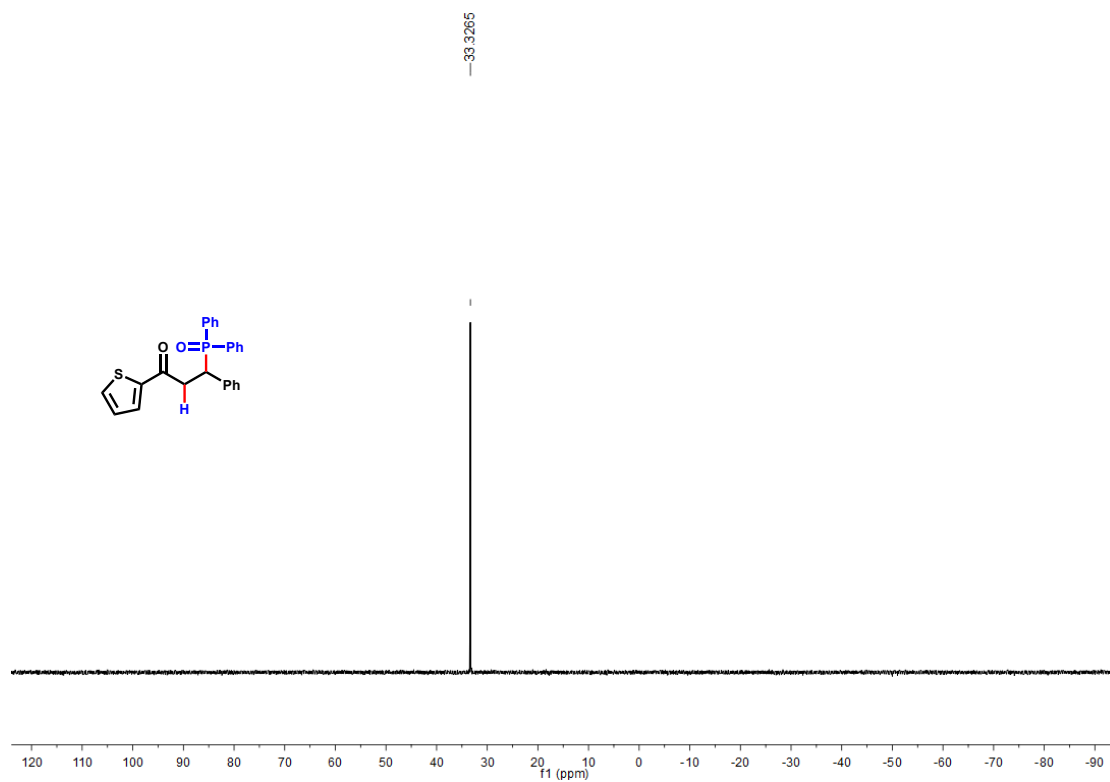

### 10c

### <sup>1</sup>H NMR

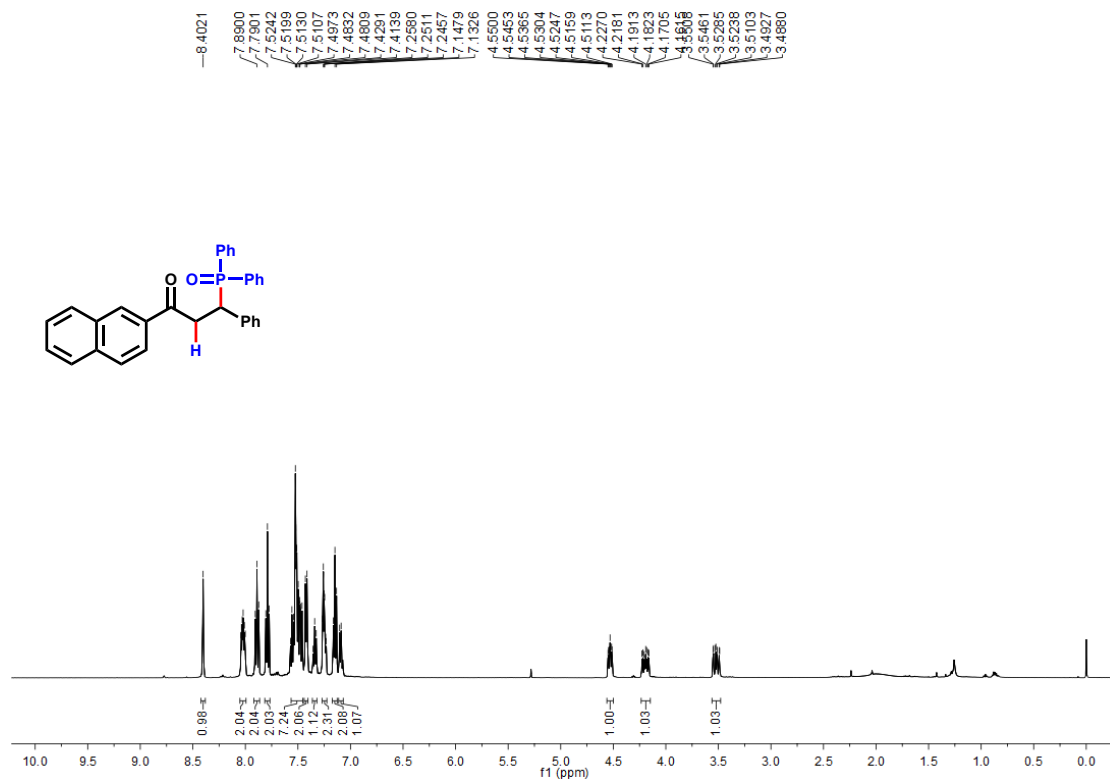

### <sup>13</sup>C NMR

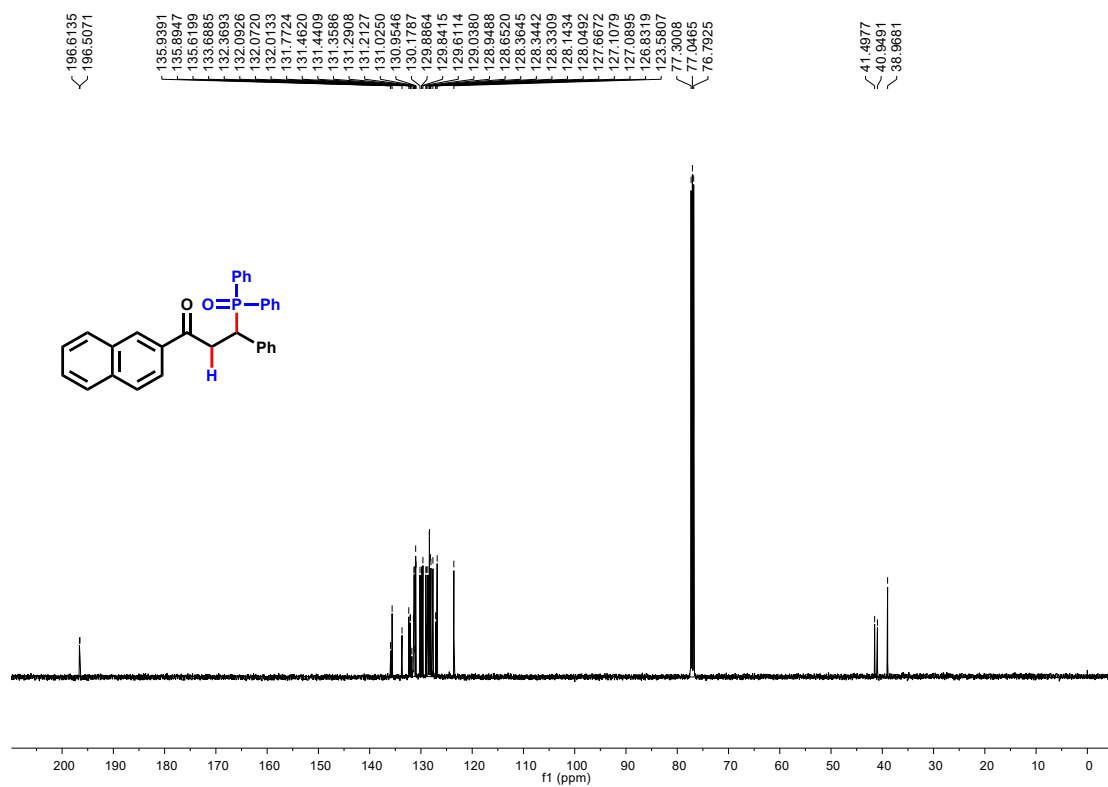

### <sup>31</sup>P NMR

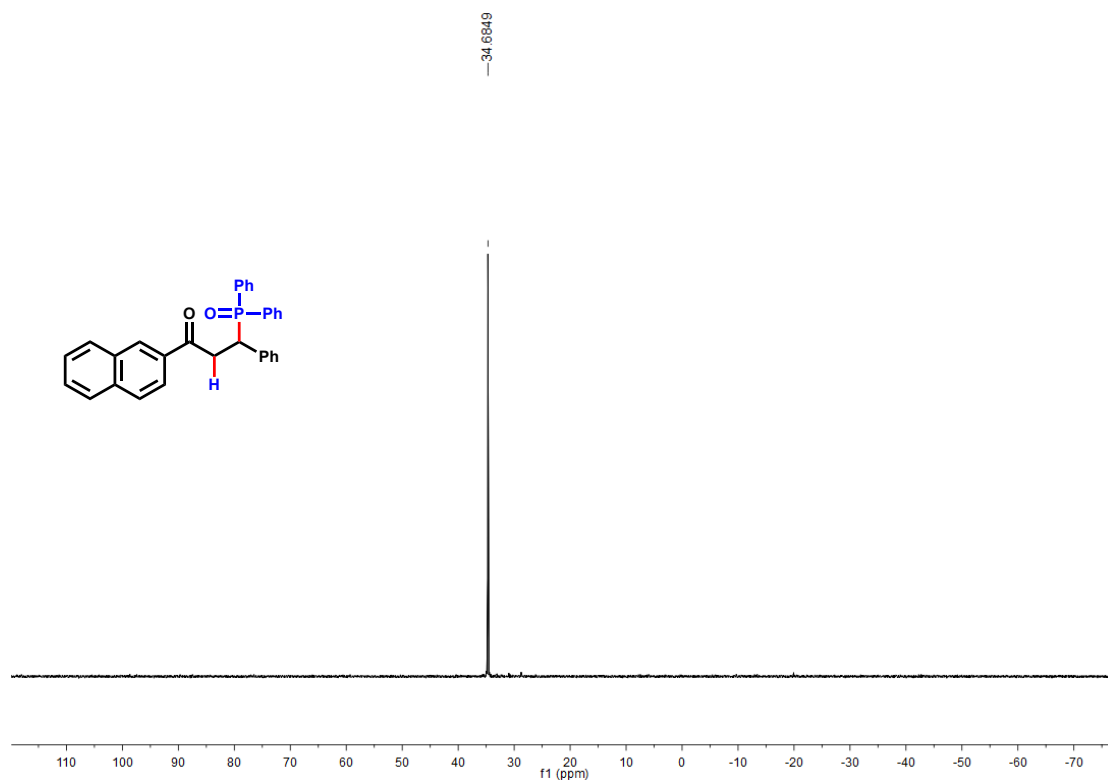

# 11c

## <sup>1</sup>H NMR

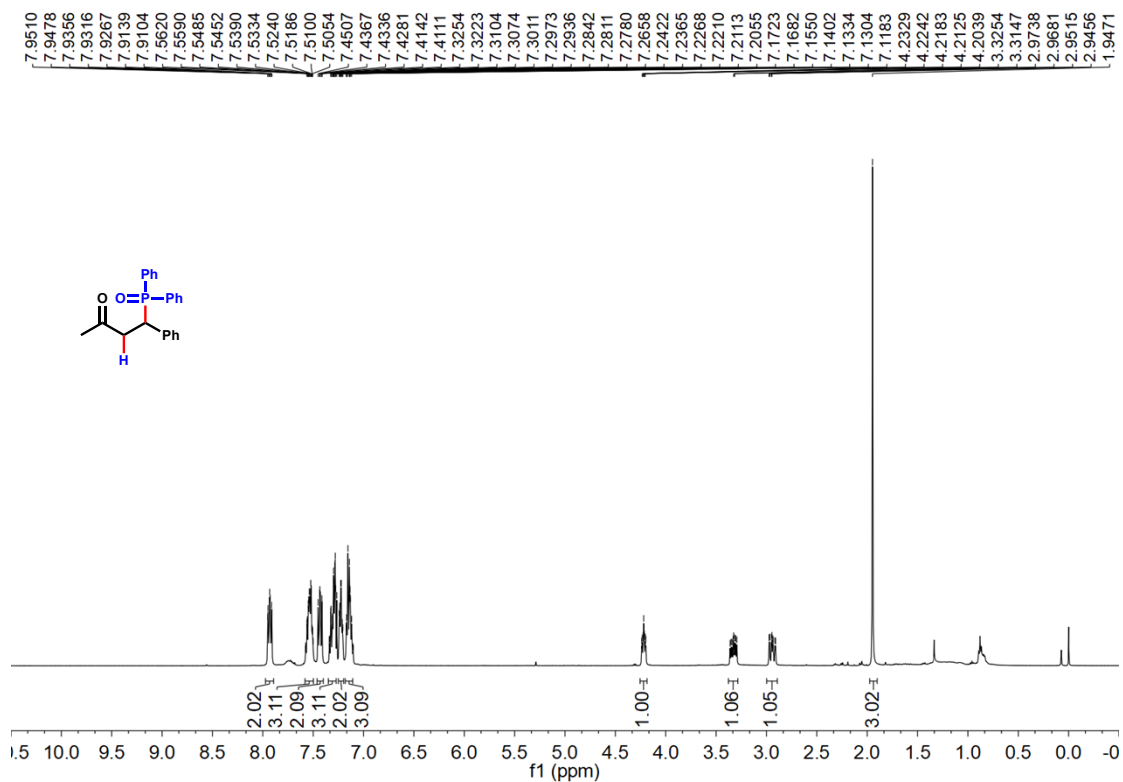

## <sup>13</sup>C NMR

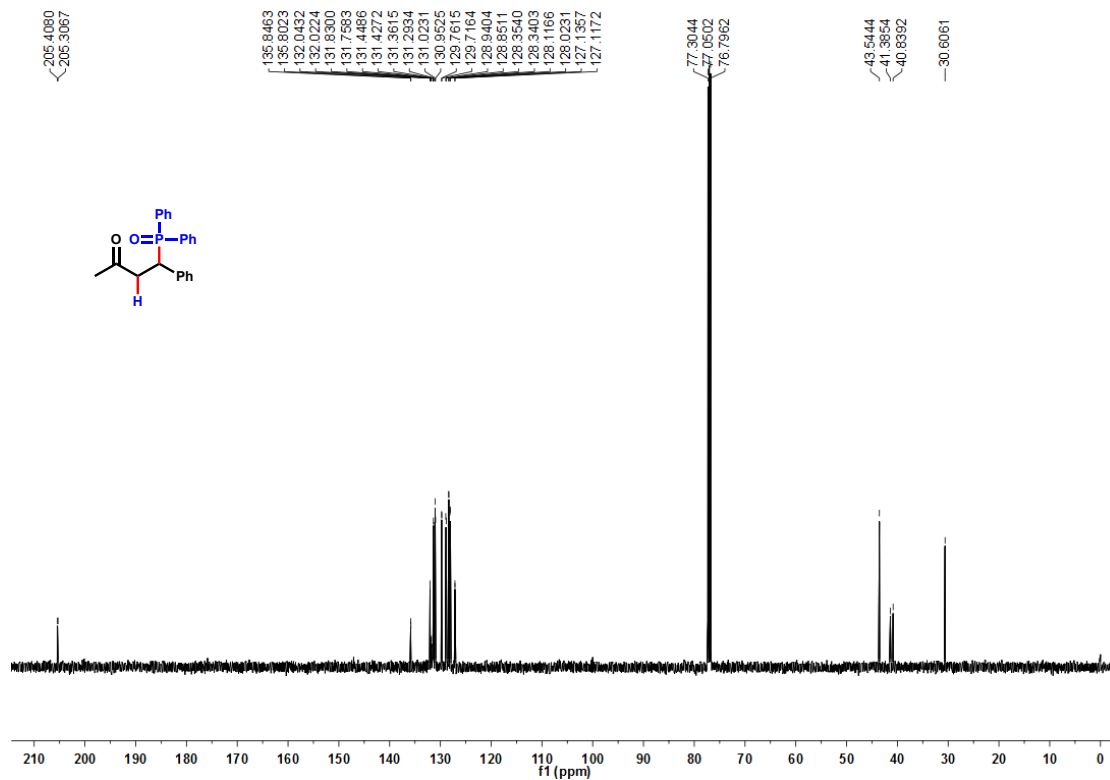

### <sup>31</sup>P NMR

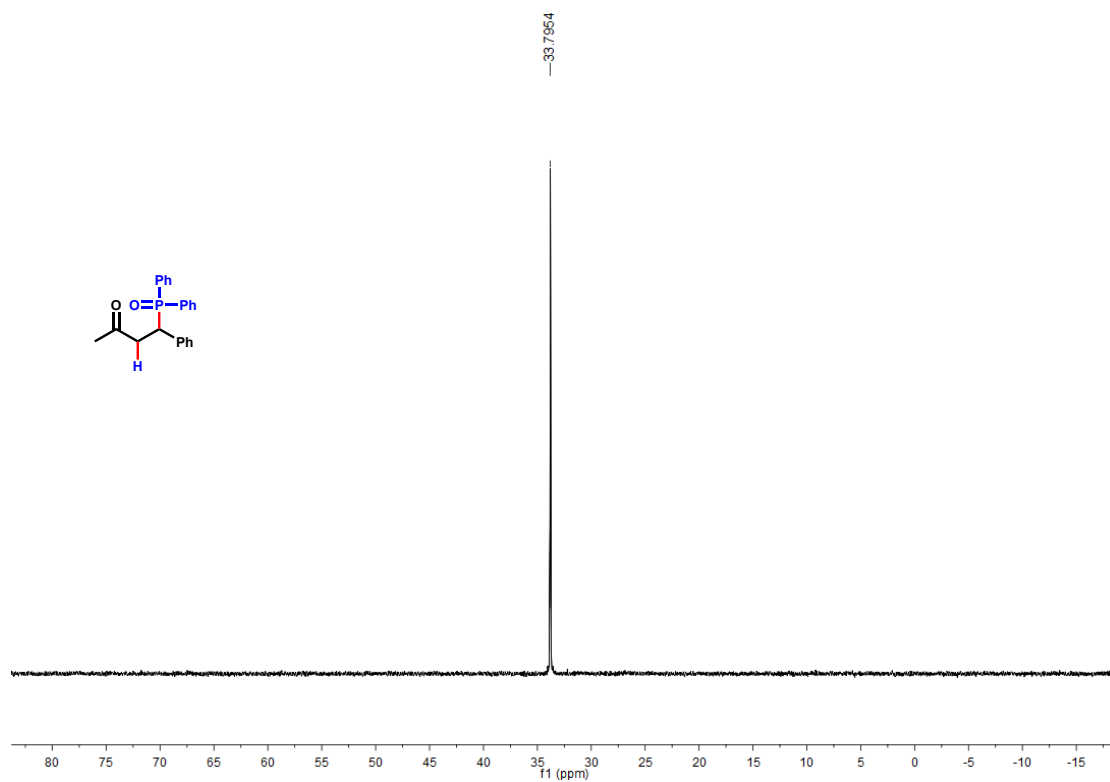

12c

### <sup>1</sup>H NMR

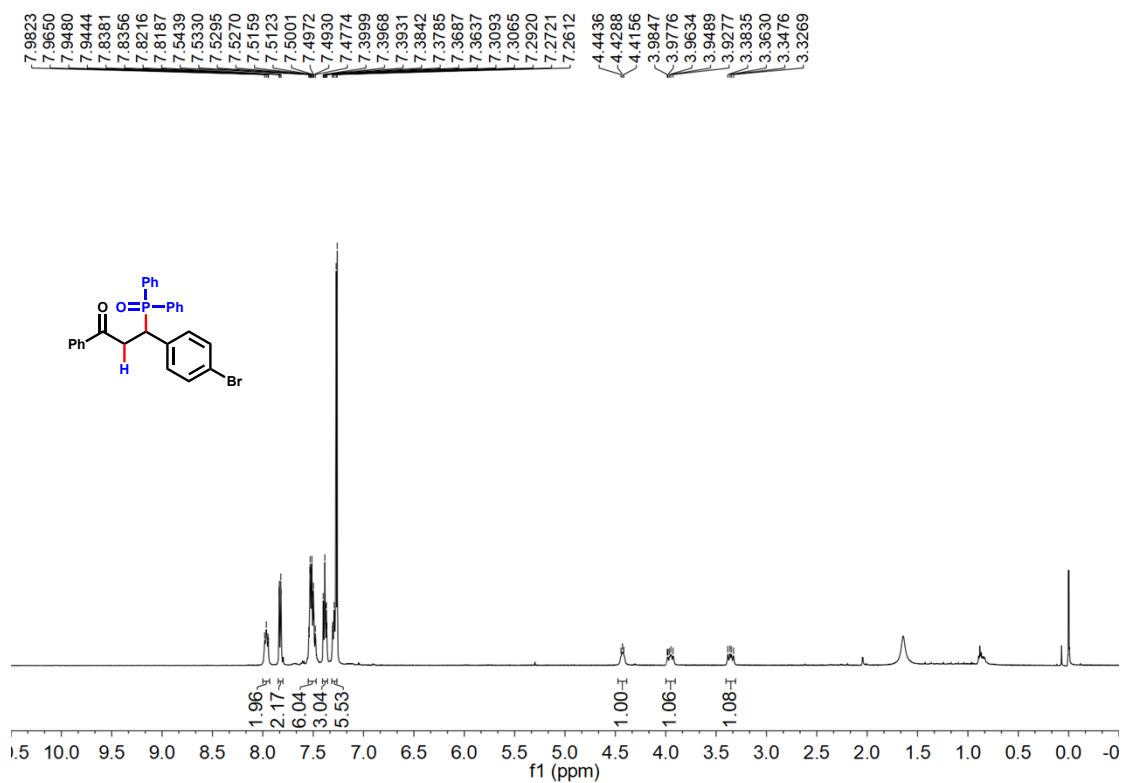

### <sup>13</sup>C NMR

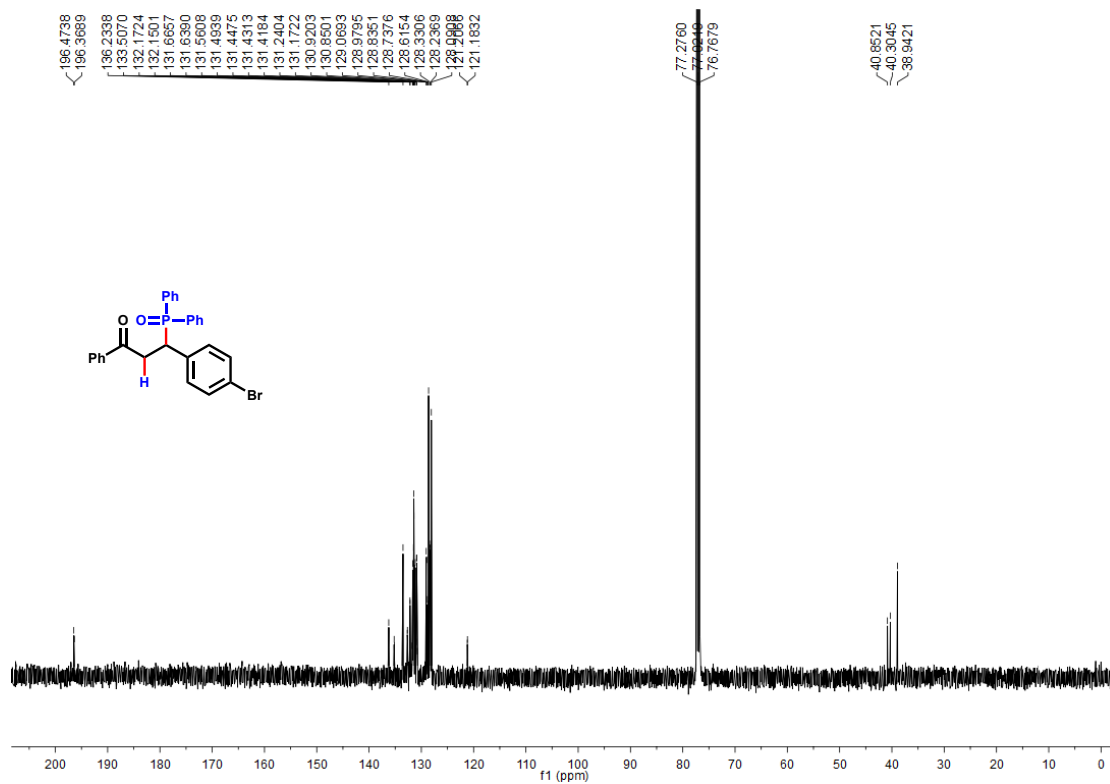

### <sup>31</sup>P NMR

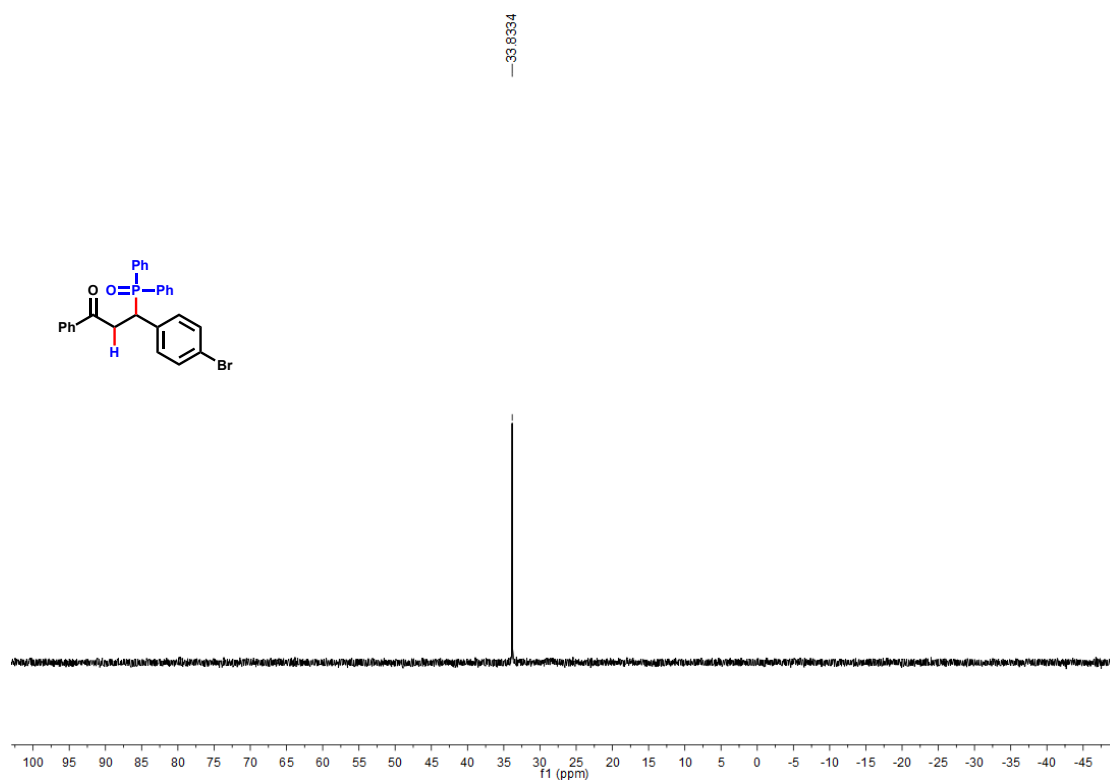



13c

<sup>1</sup>H NMR

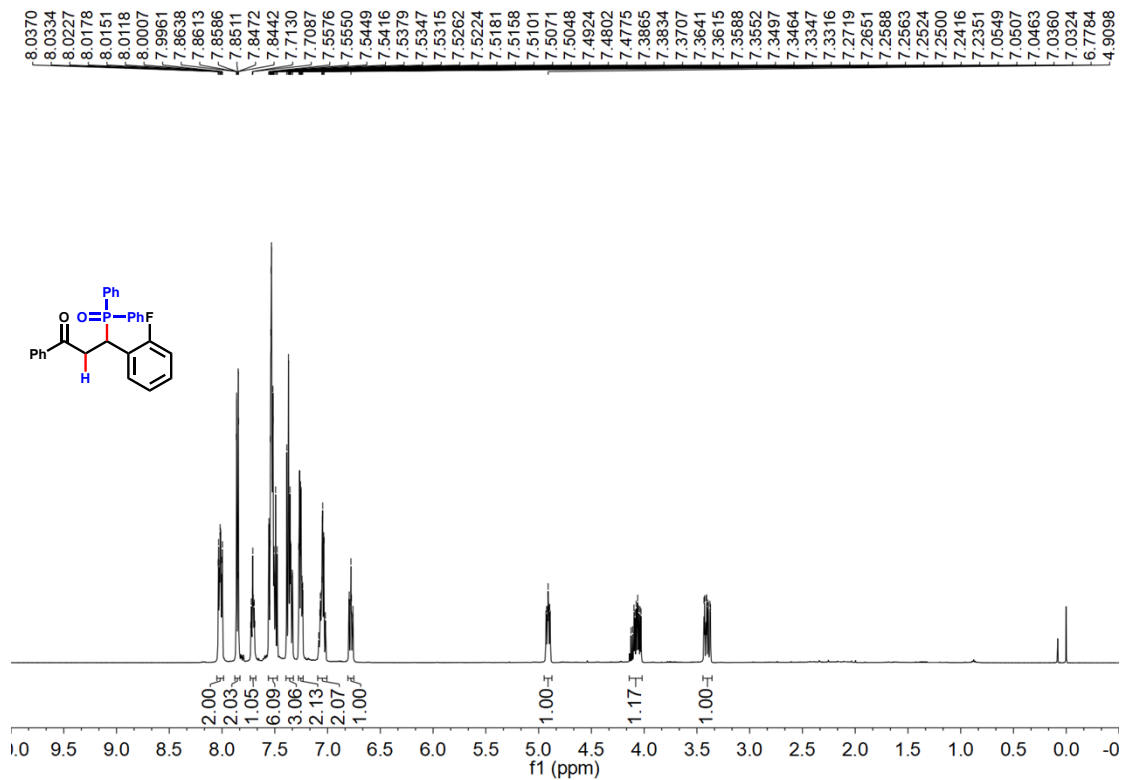

<sup>13</sup>C NMR

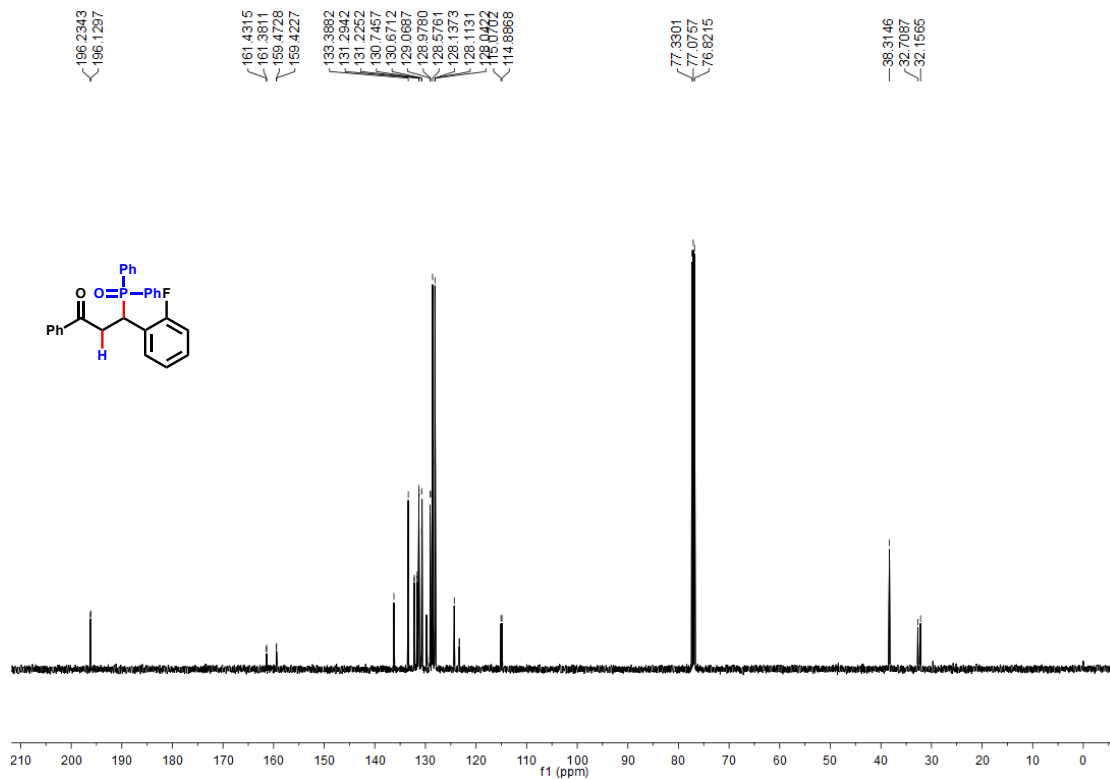

### <sup>19</sup>F NMR

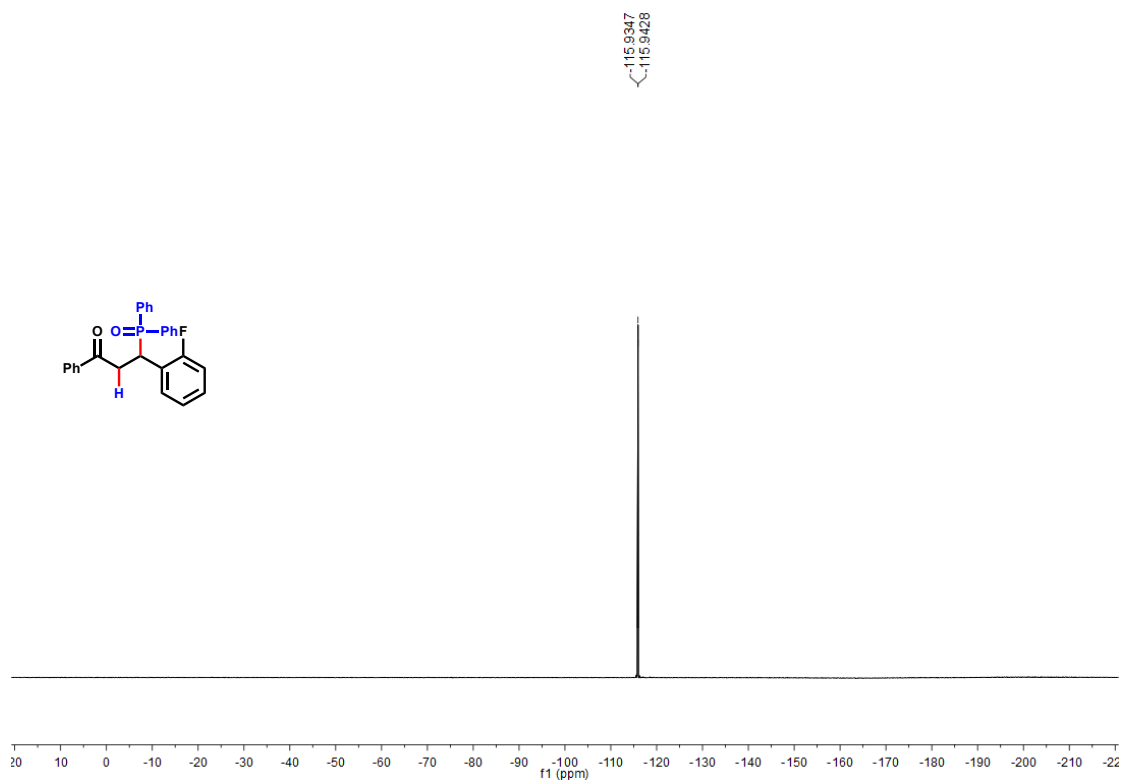

### <sup>31</sup>P NMR

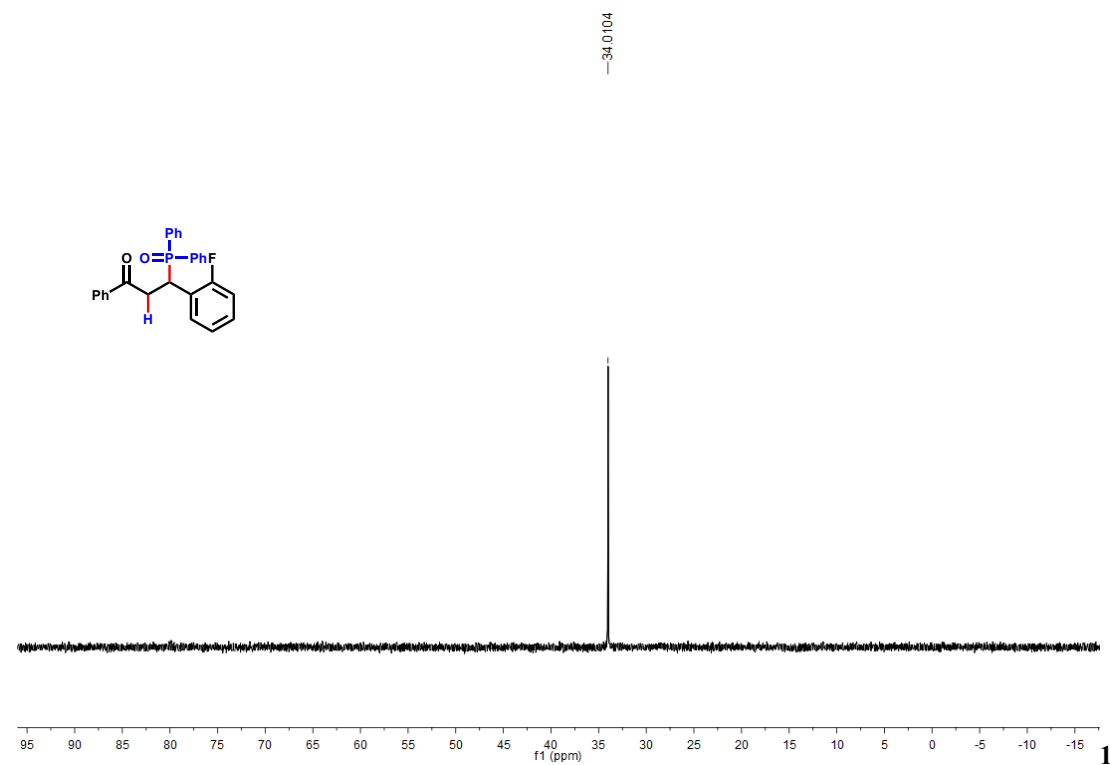

4c

<sup>1</sup>H NMR

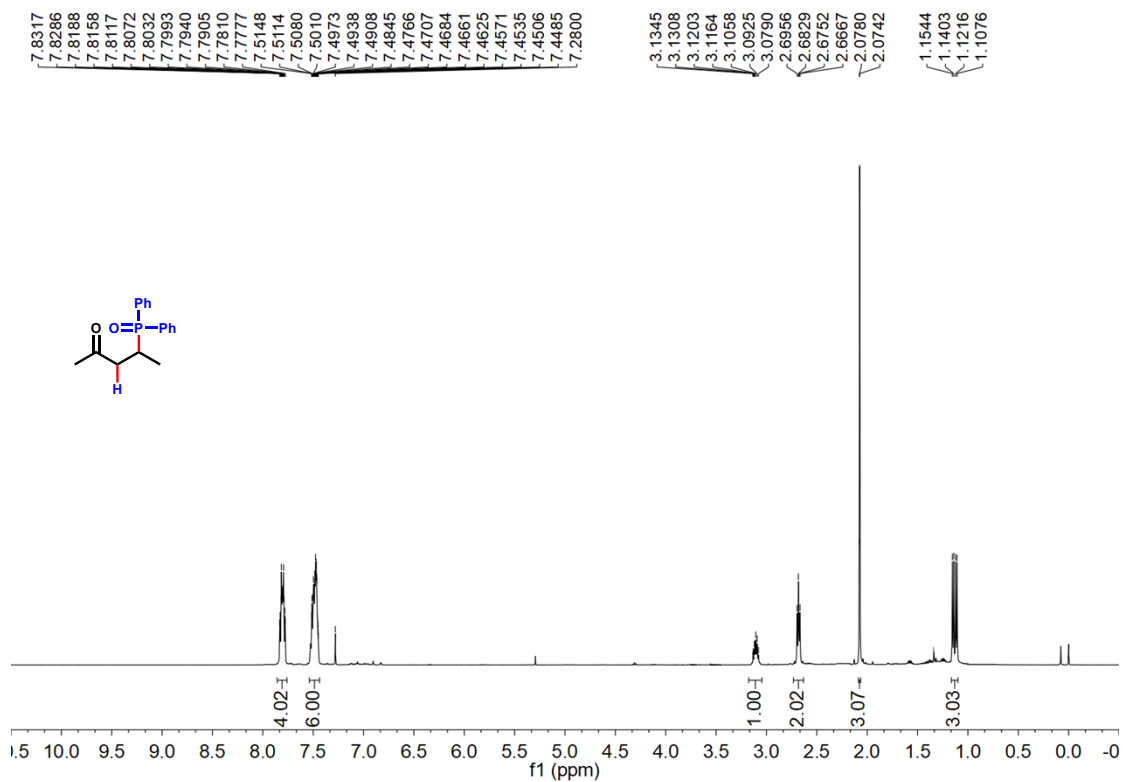

<sup>13</sup>C NMR

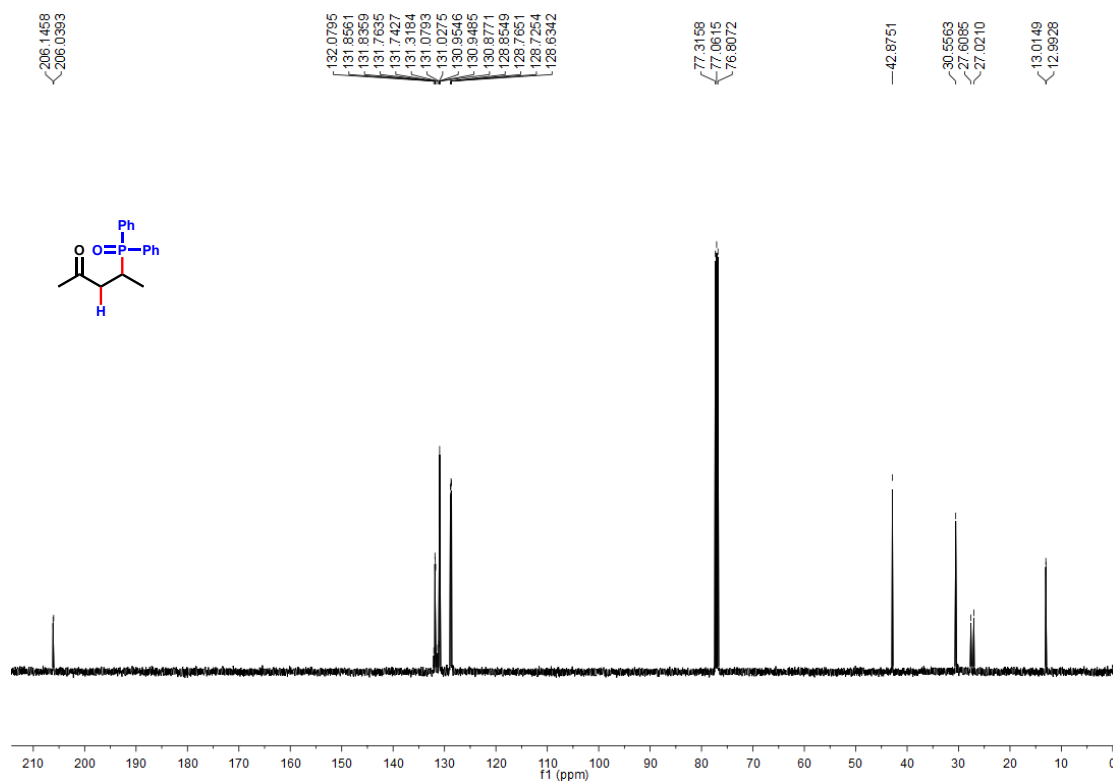

### <sup>31</sup>P NMR

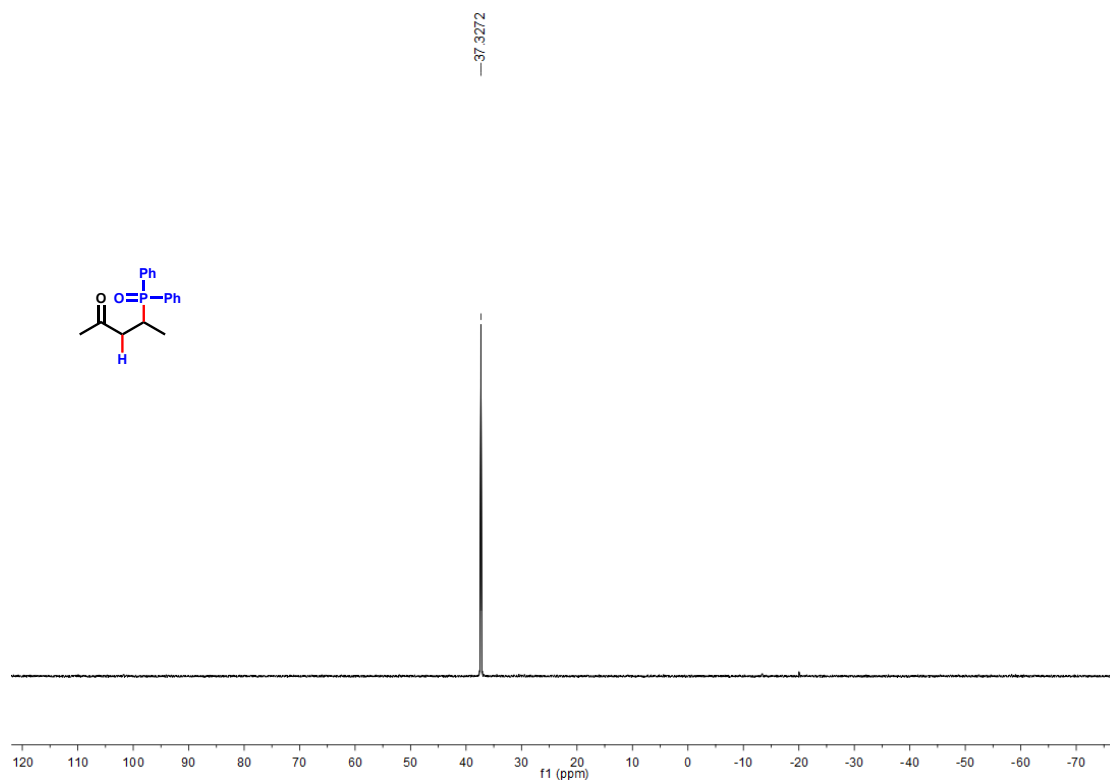

15c

### <sup>1</sup>H NMR

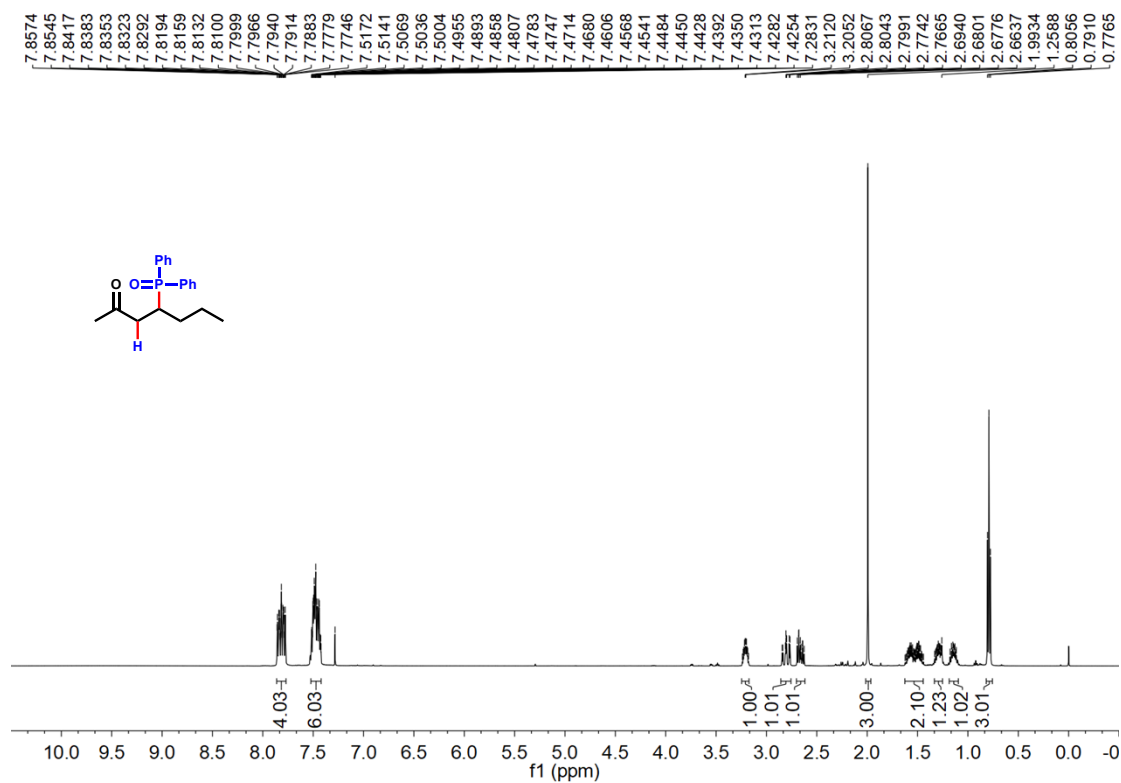

### <sup>13</sup>C NMR

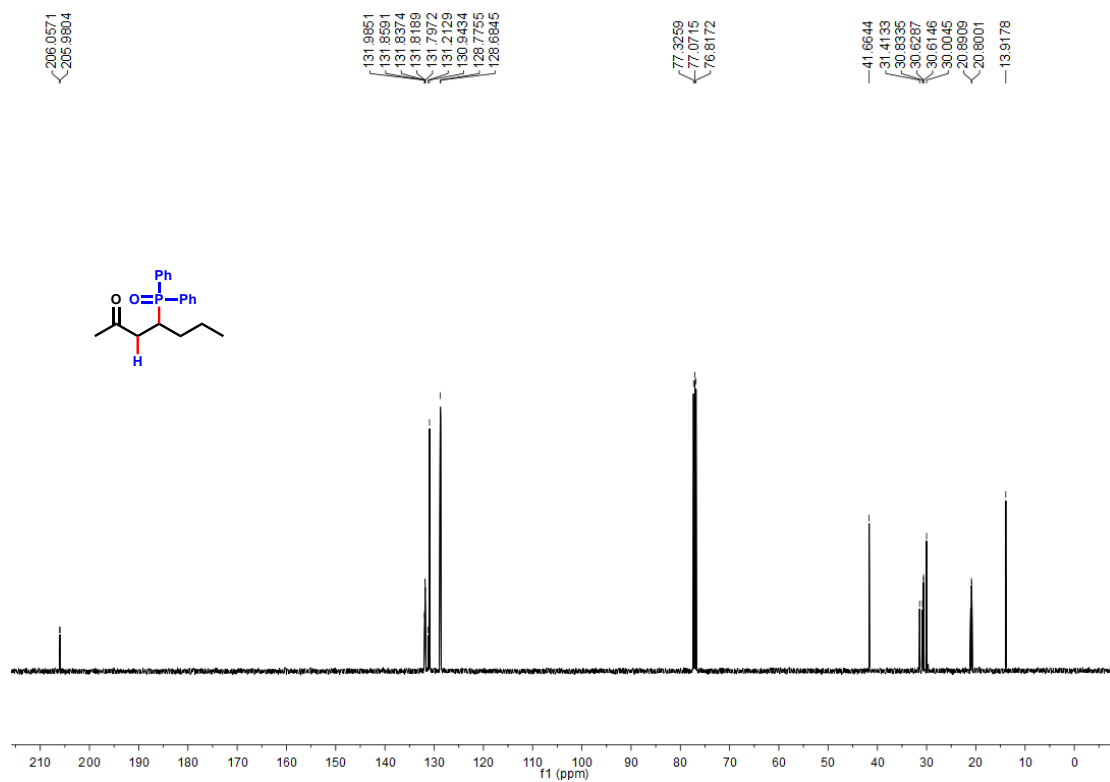

### <sup>31</sup>P NMR

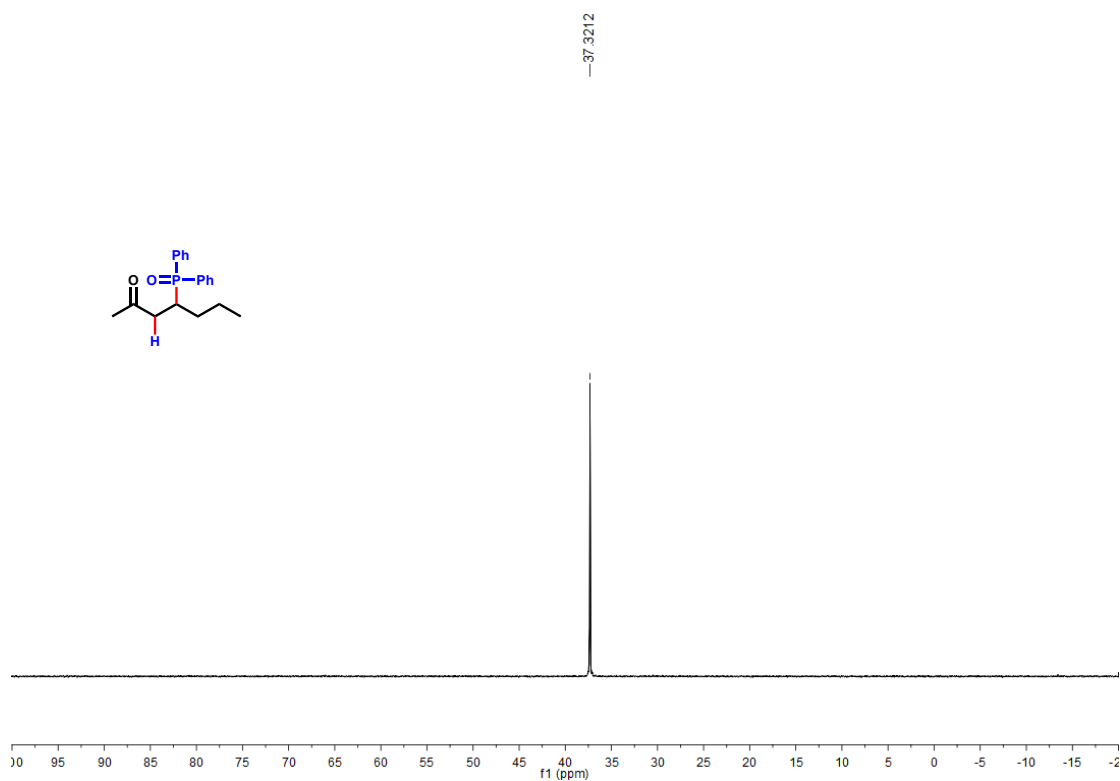

16c

<sup>1</sup>H NMR

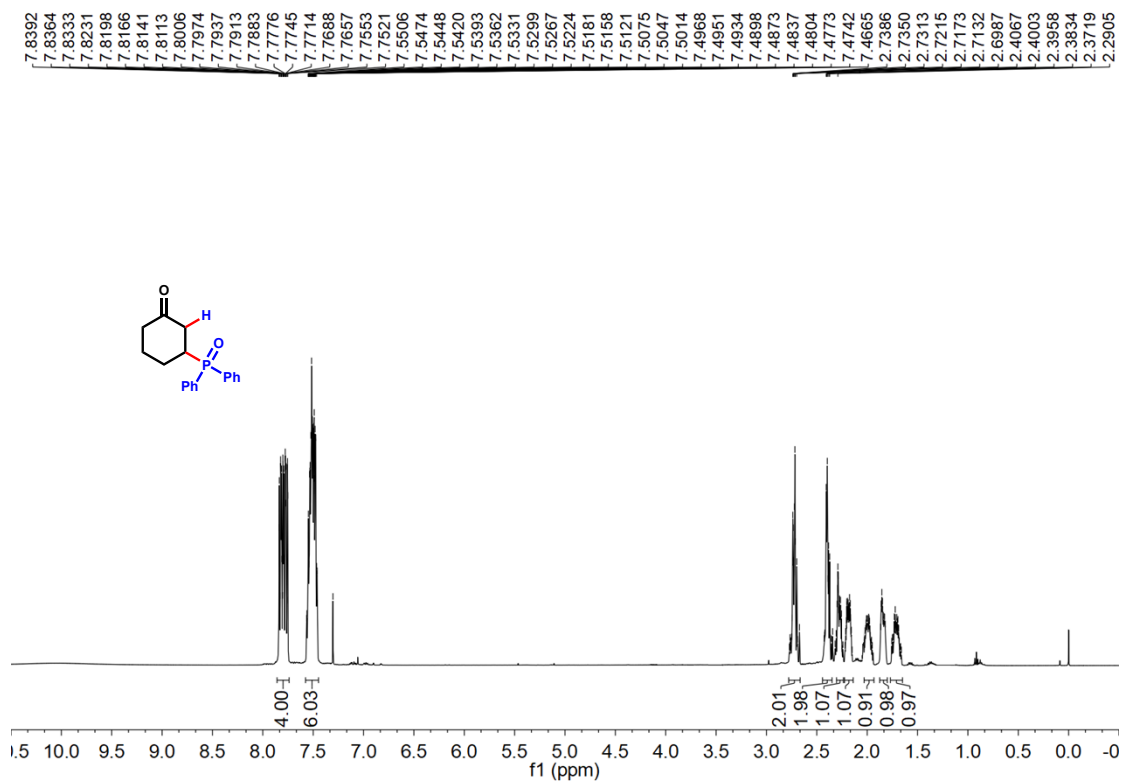

<sup>13</sup>C NMR

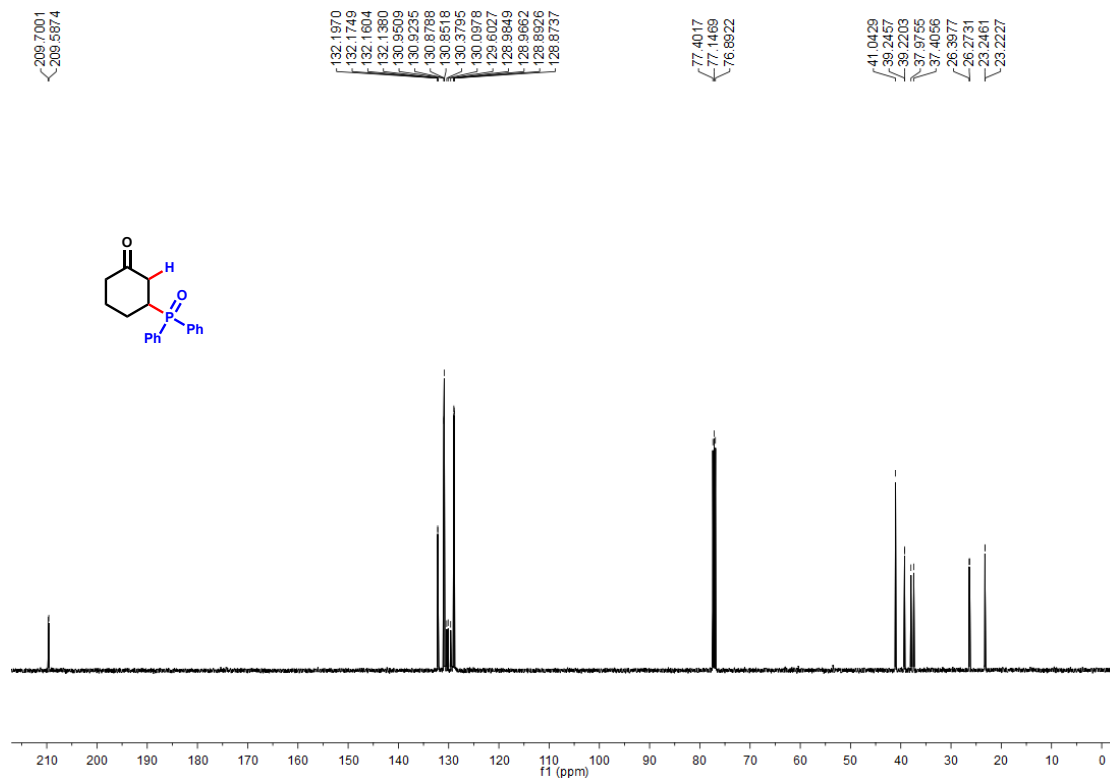

### <sup>31</sup>P NMR

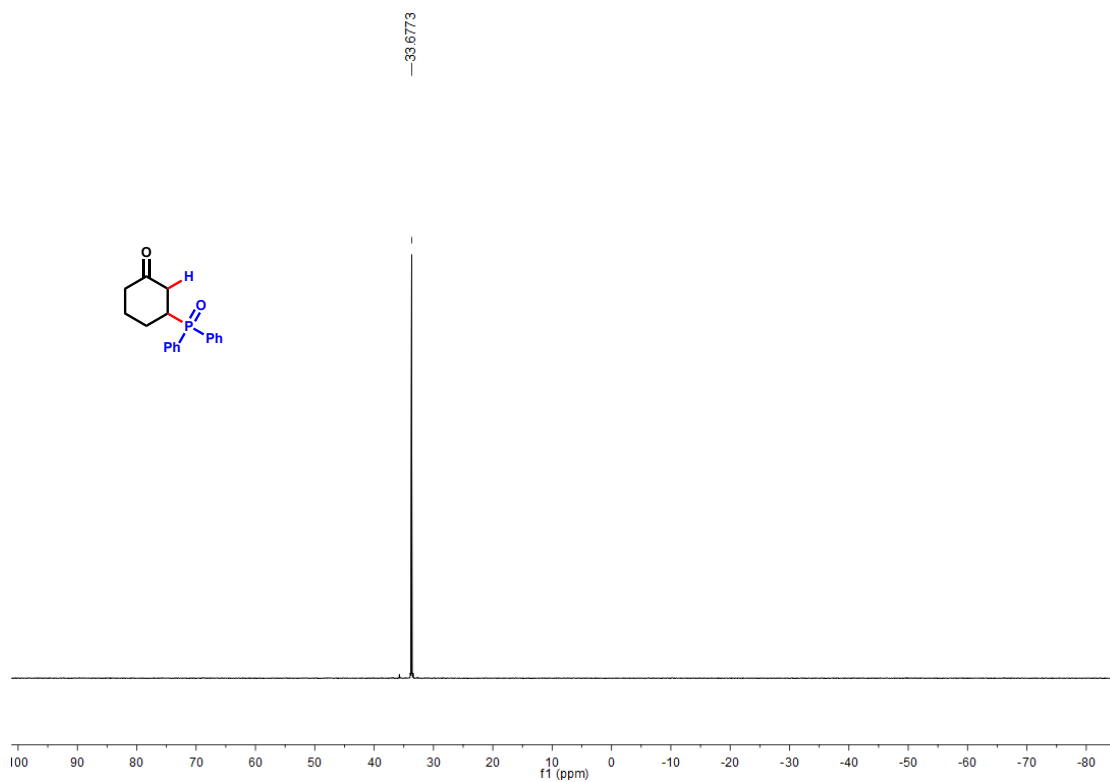

17c

### <sup>1</sup>H NMR

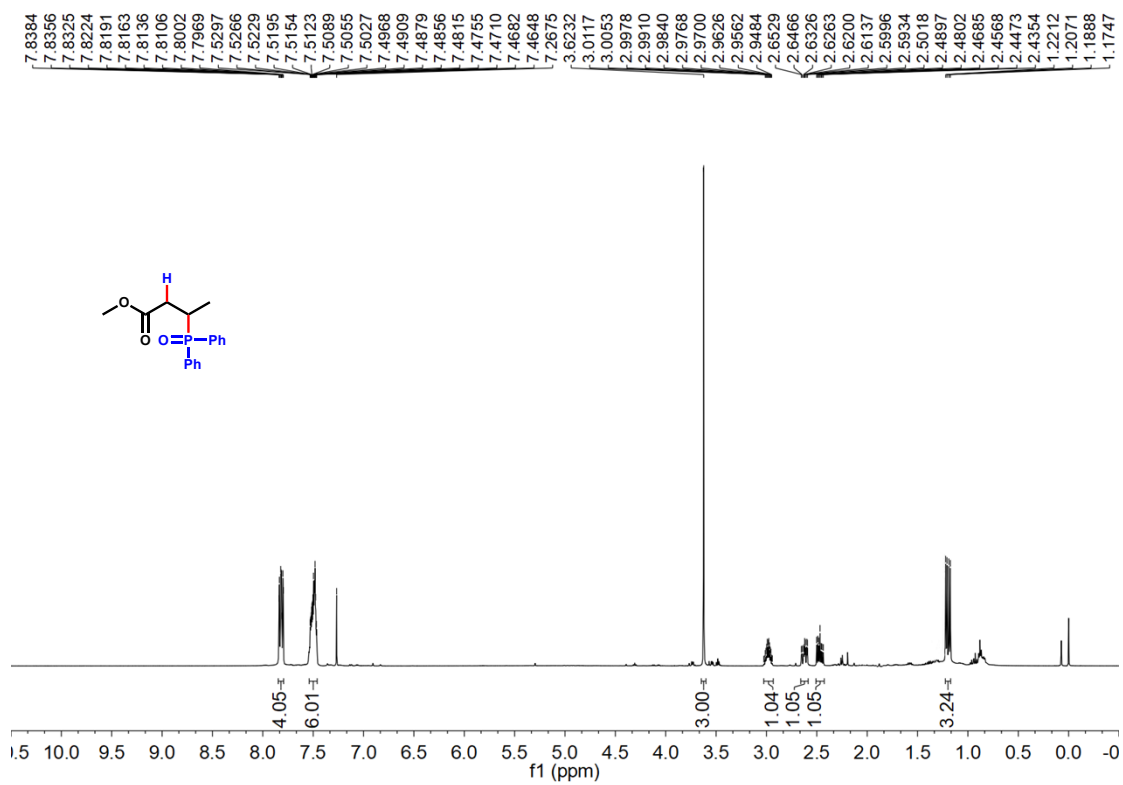

### <sup>13</sup>C NMR

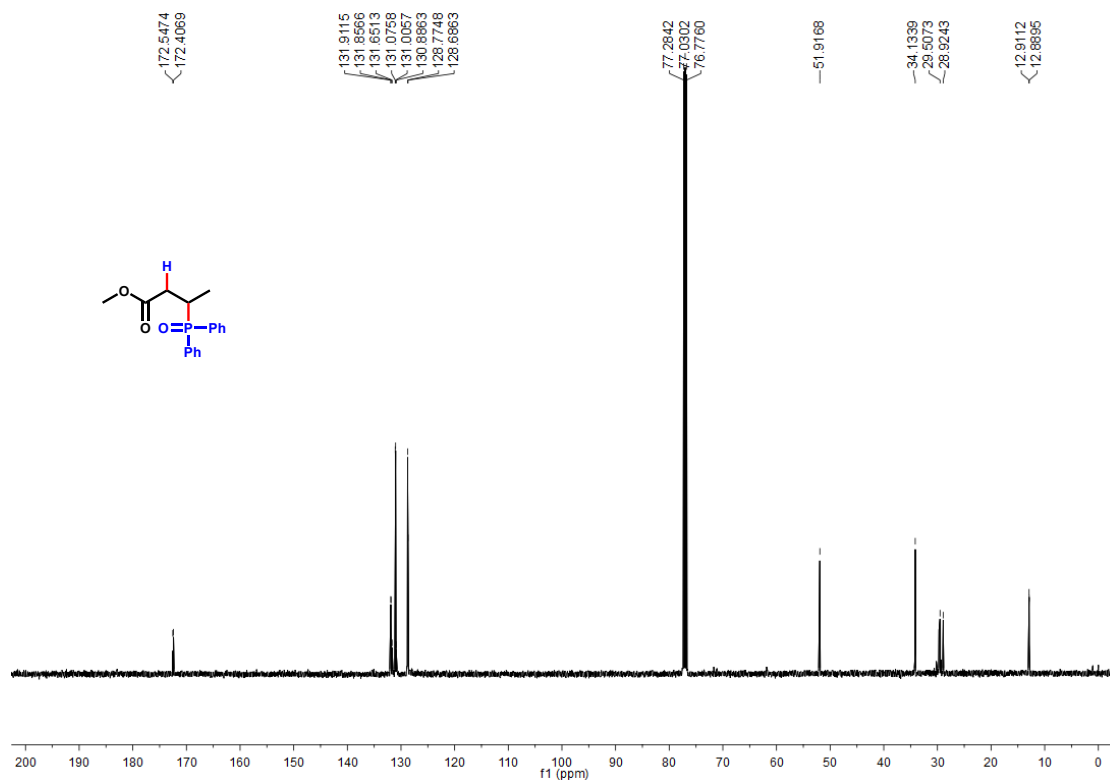

### <sup>31</sup>P NMR

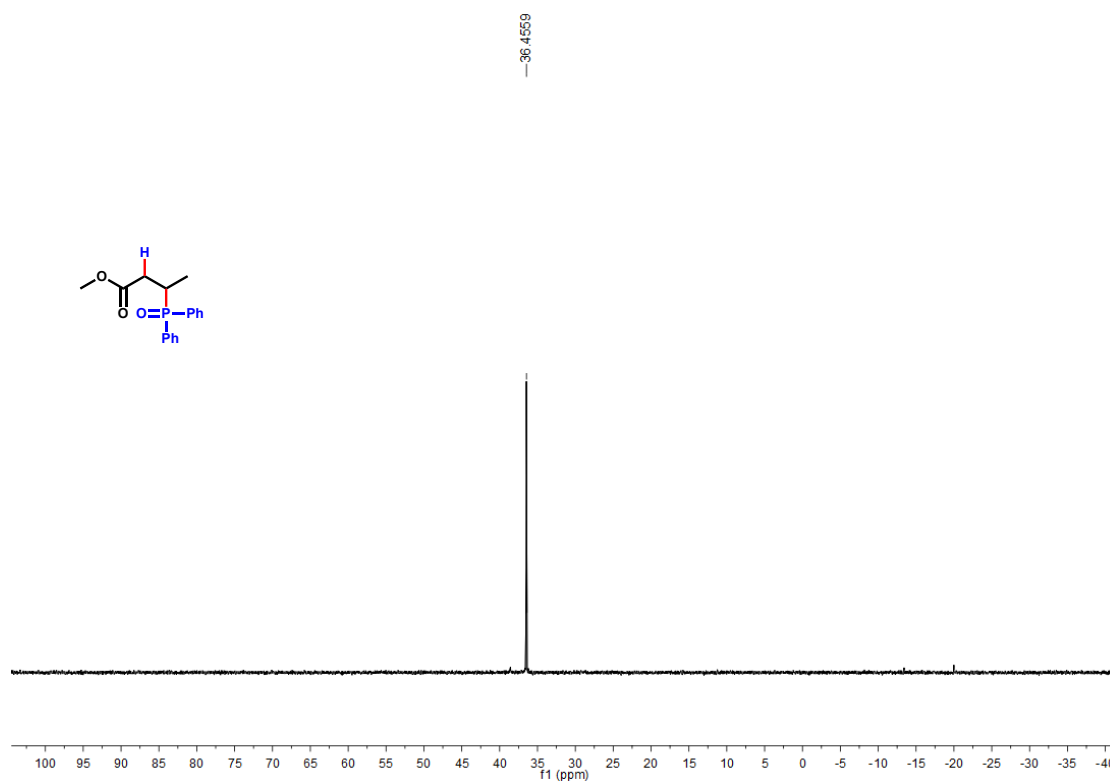



18c

<sup>1</sup>H NMR

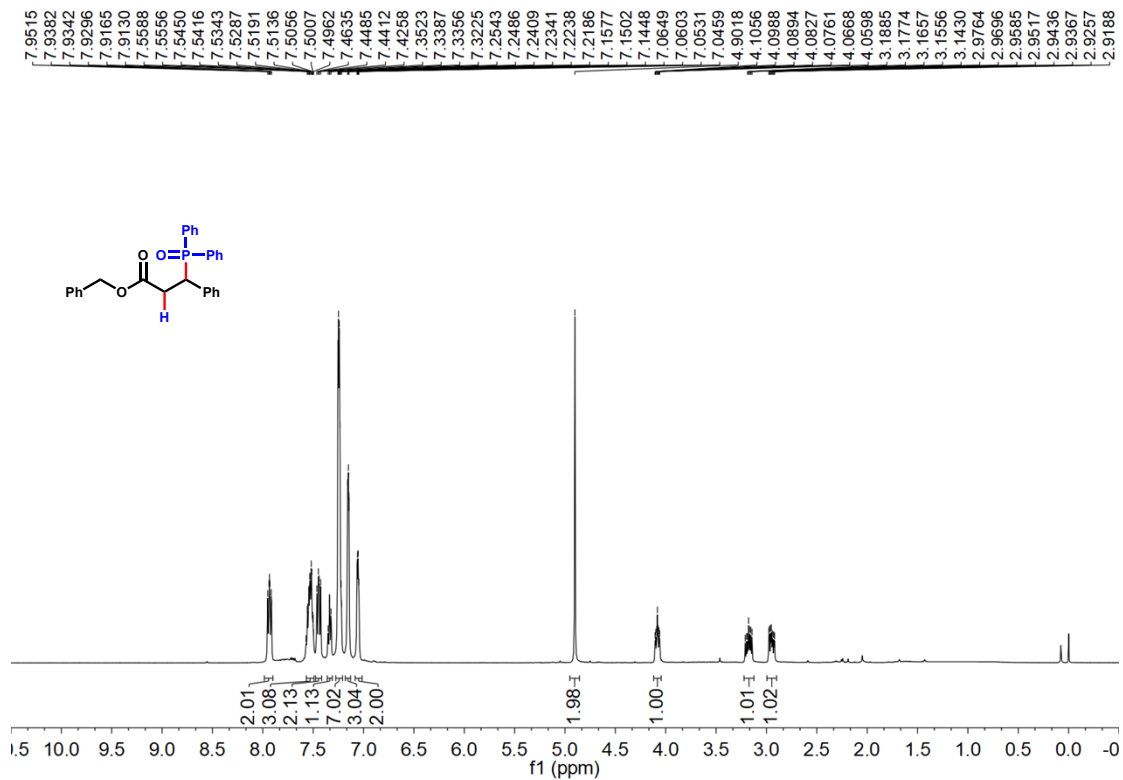

<sup>13</sup>C NMR

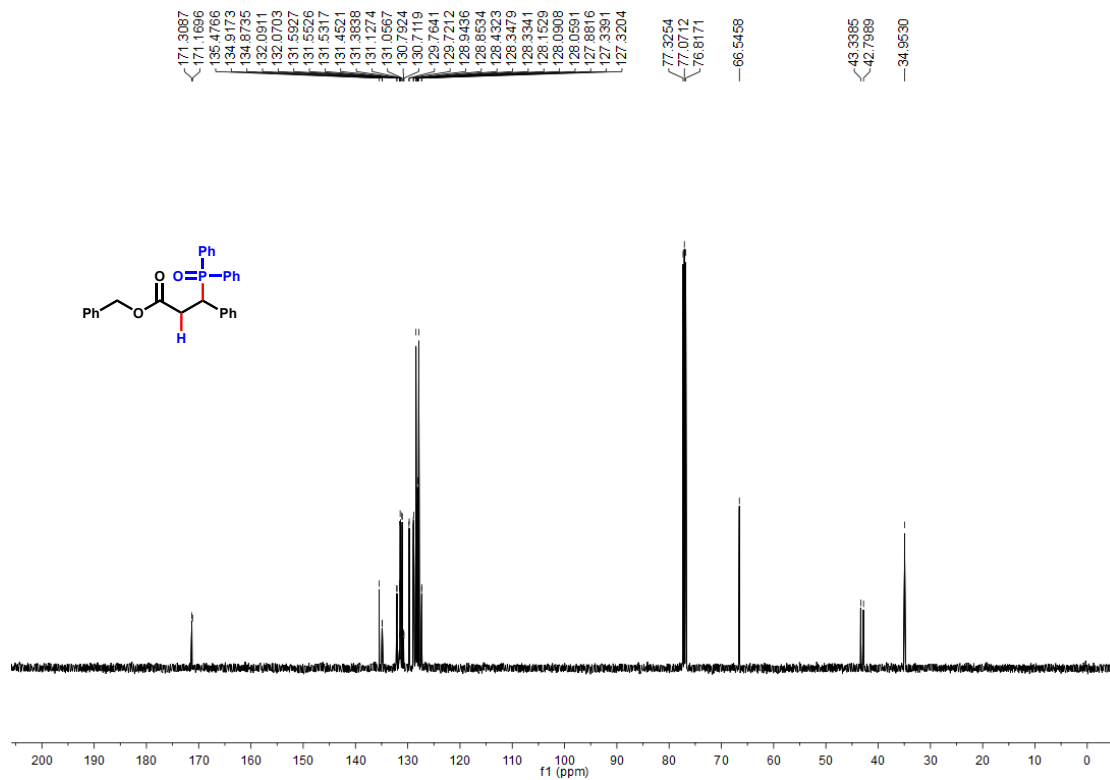

### <sup>31</sup>P NMR

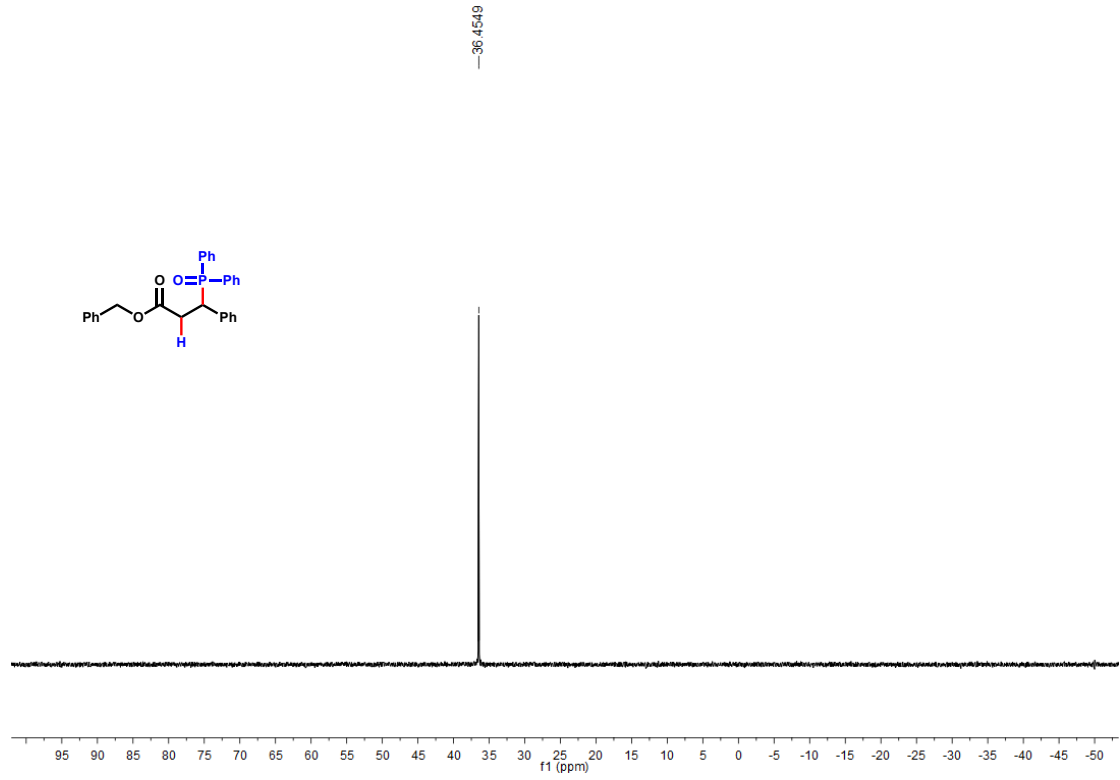

19c

### <sup>1</sup>H NMR

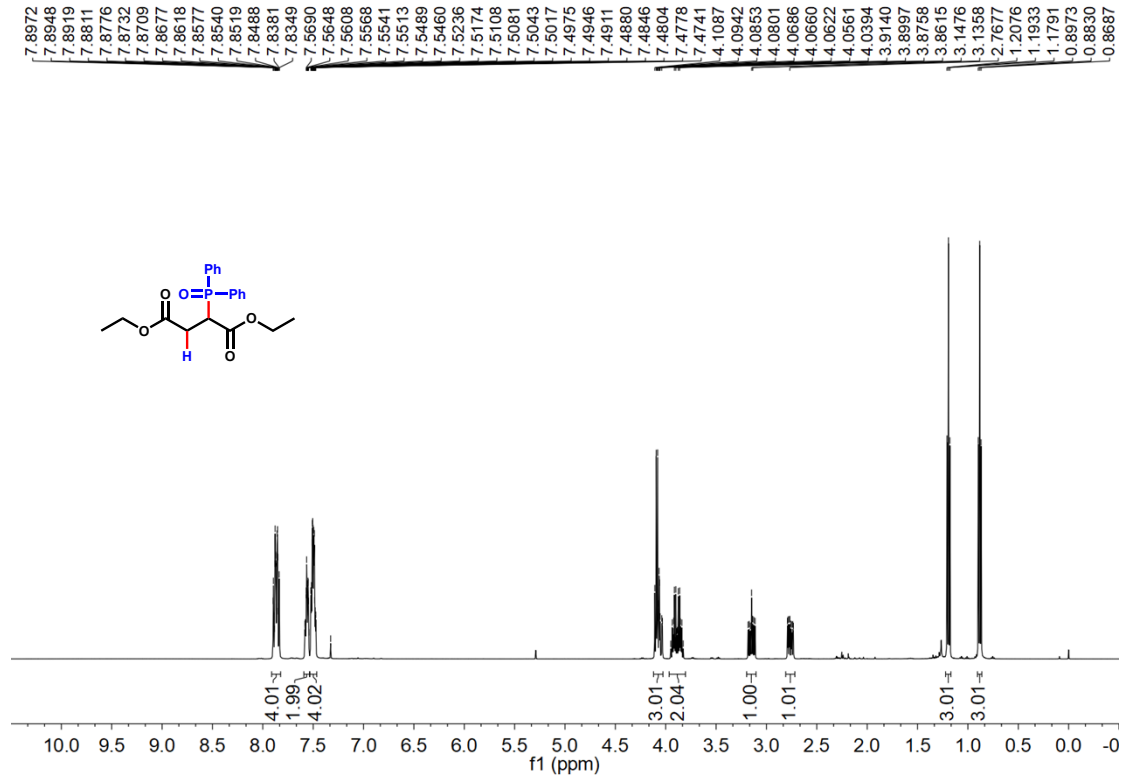

### <sup>13</sup>C NMR

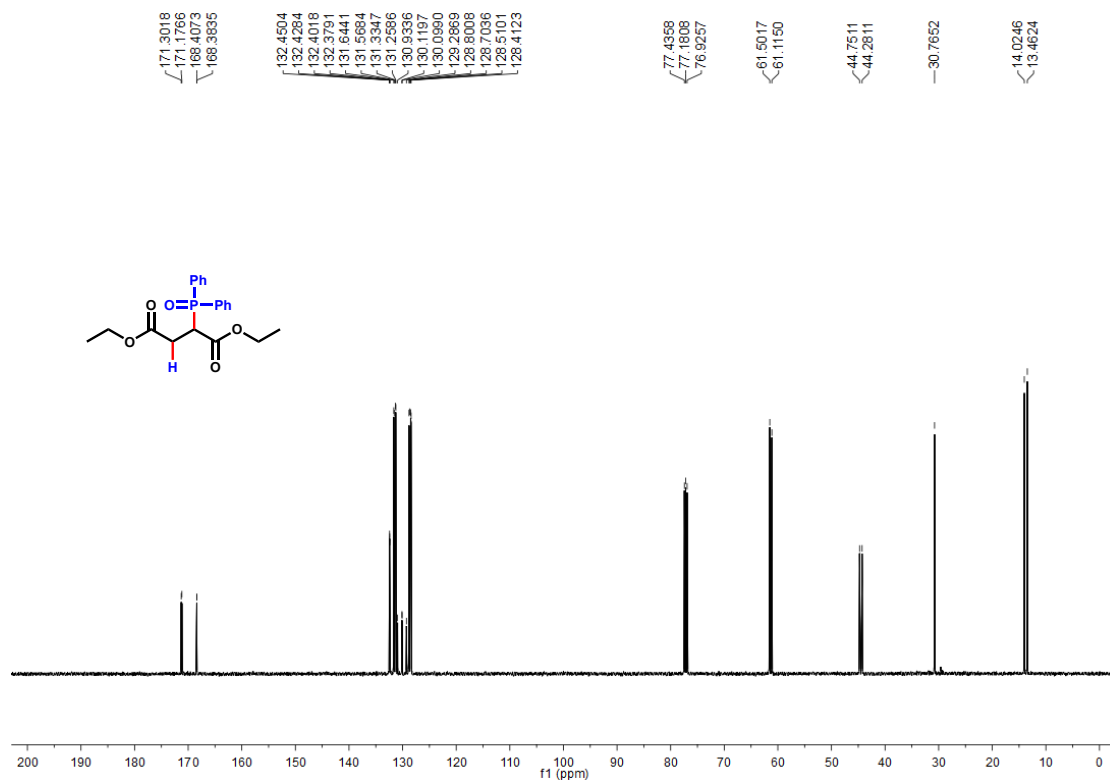

### <sup>31</sup>P NMR

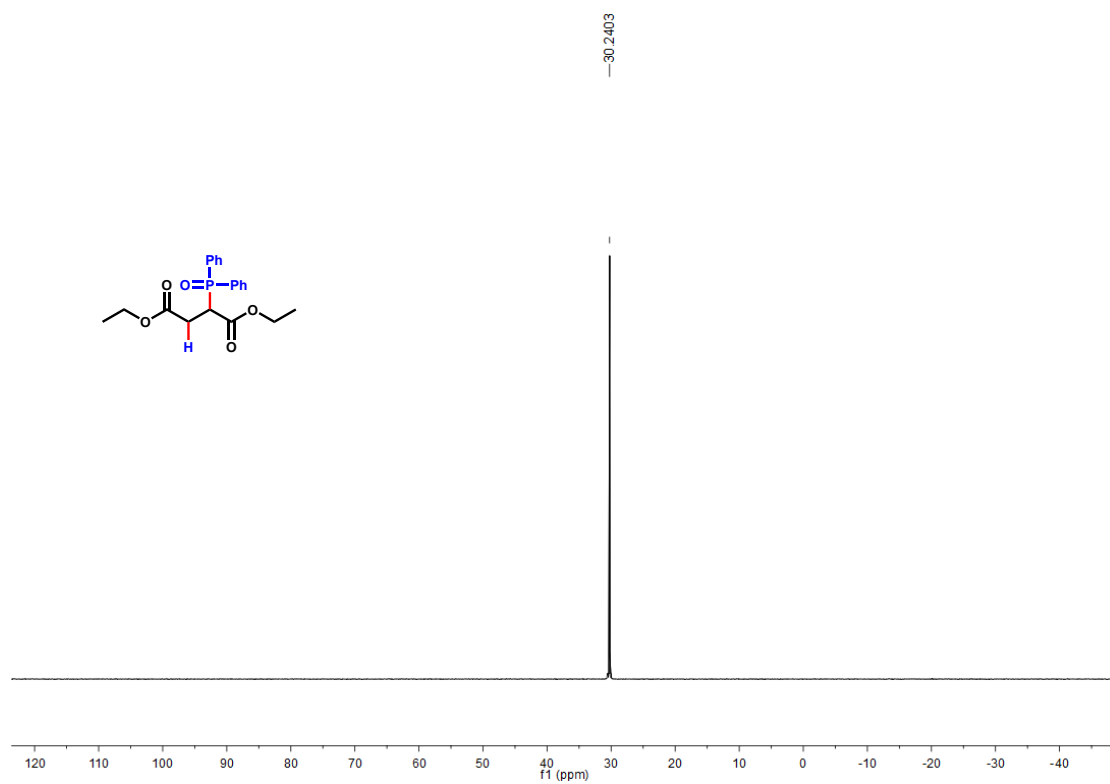

20c

<sup>1</sup>H NMR

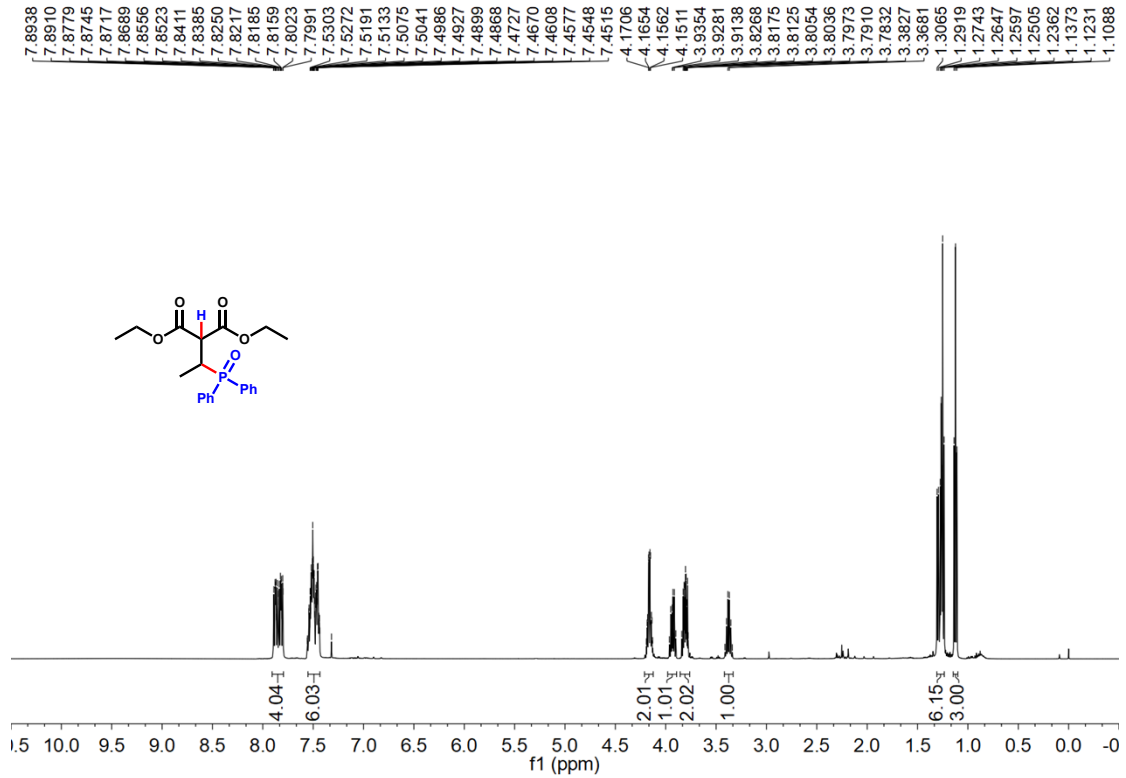

<sup>13</sup>C NMR

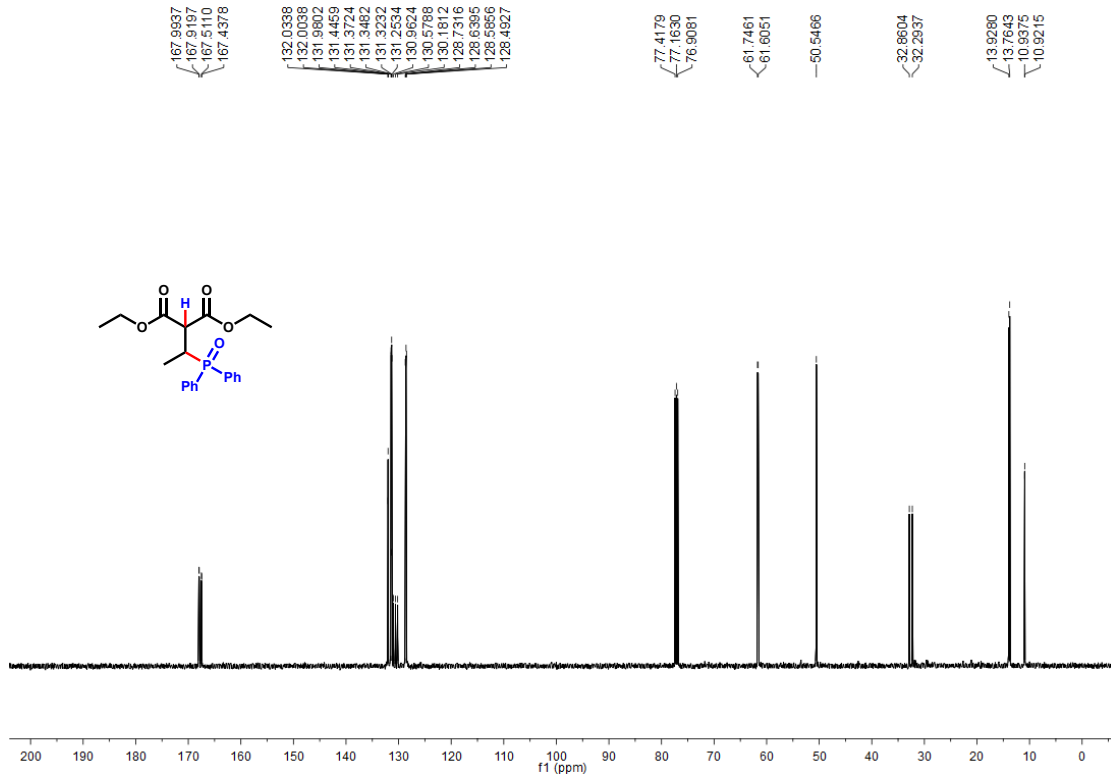

### <sup>31</sup>P NMR

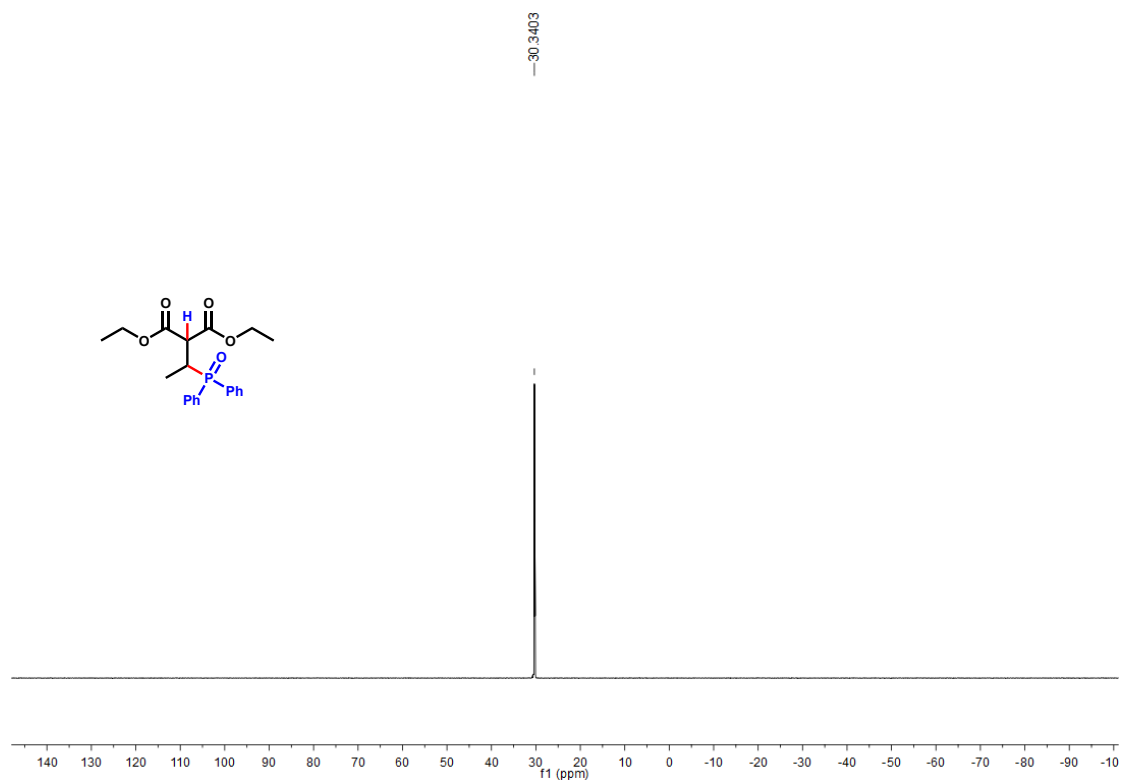

21c

### <sup>1</sup>H NMR

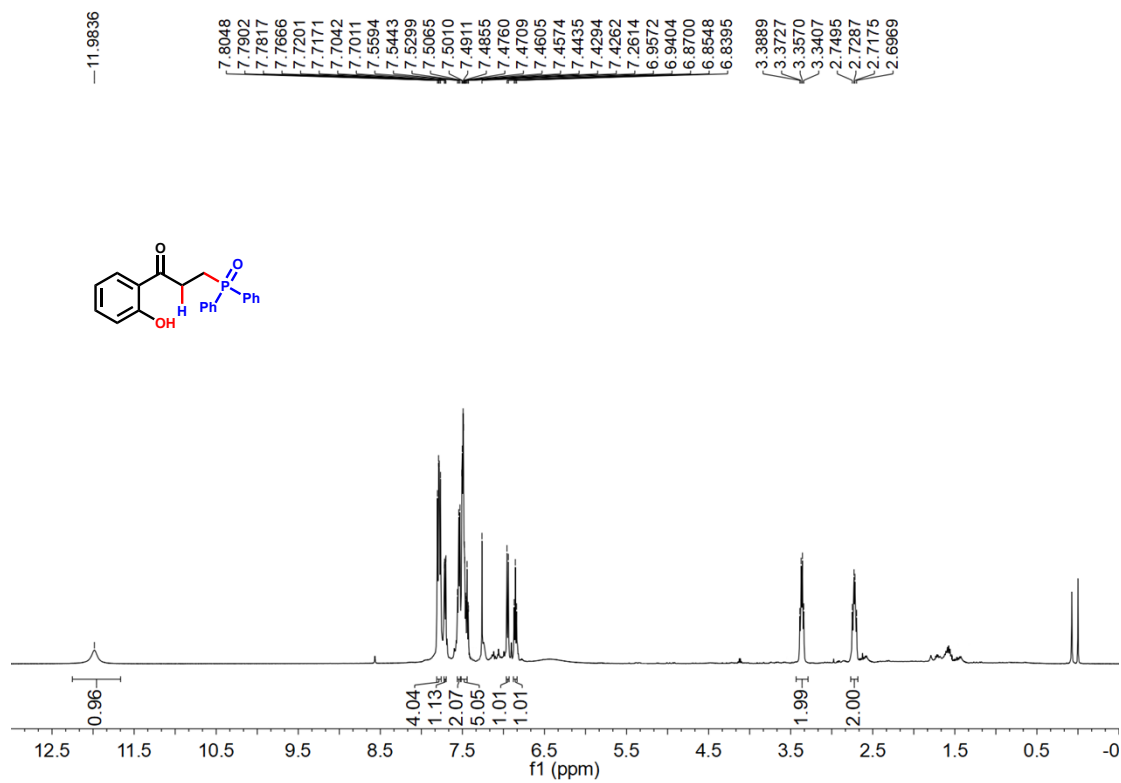

### <sup>13</sup>C NMR

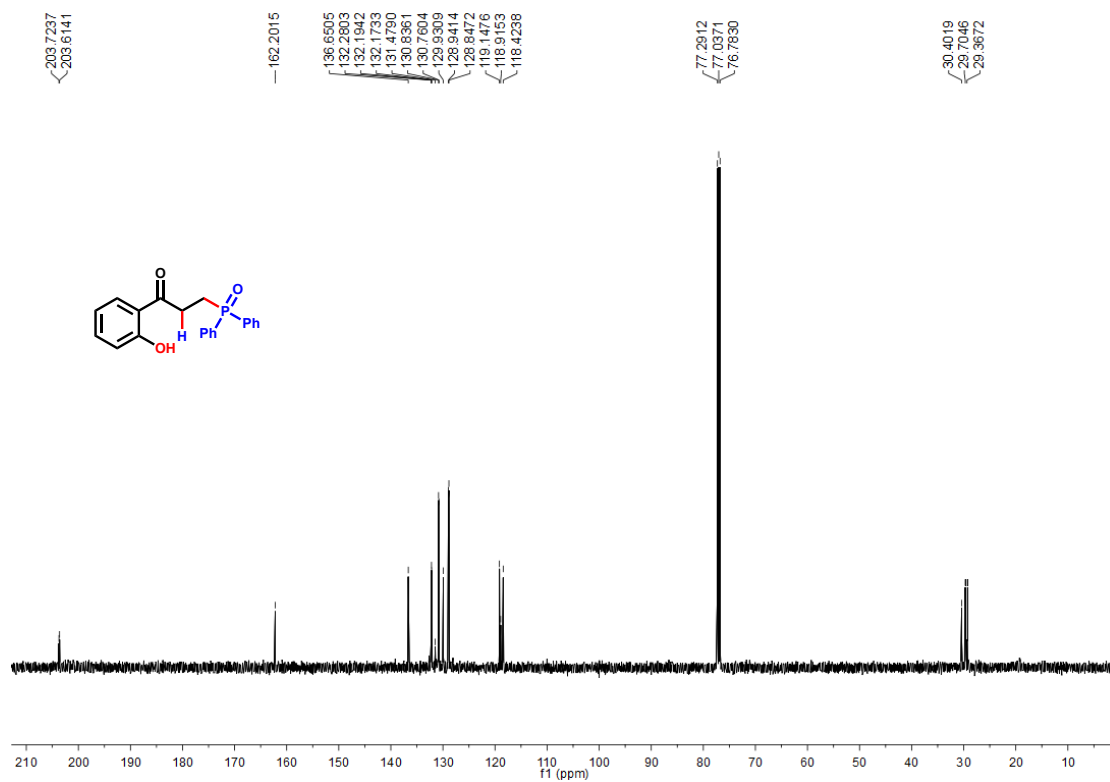

### <sup>31</sup>P NMR

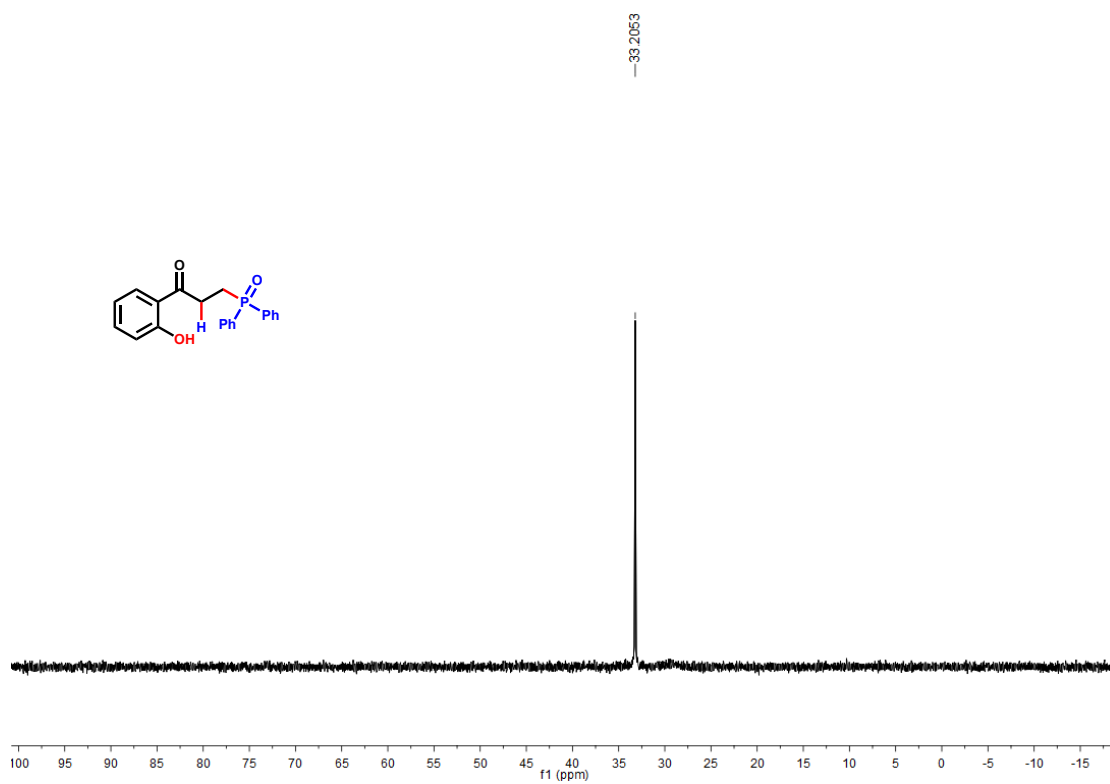

22c

<sup>1</sup>H NMR

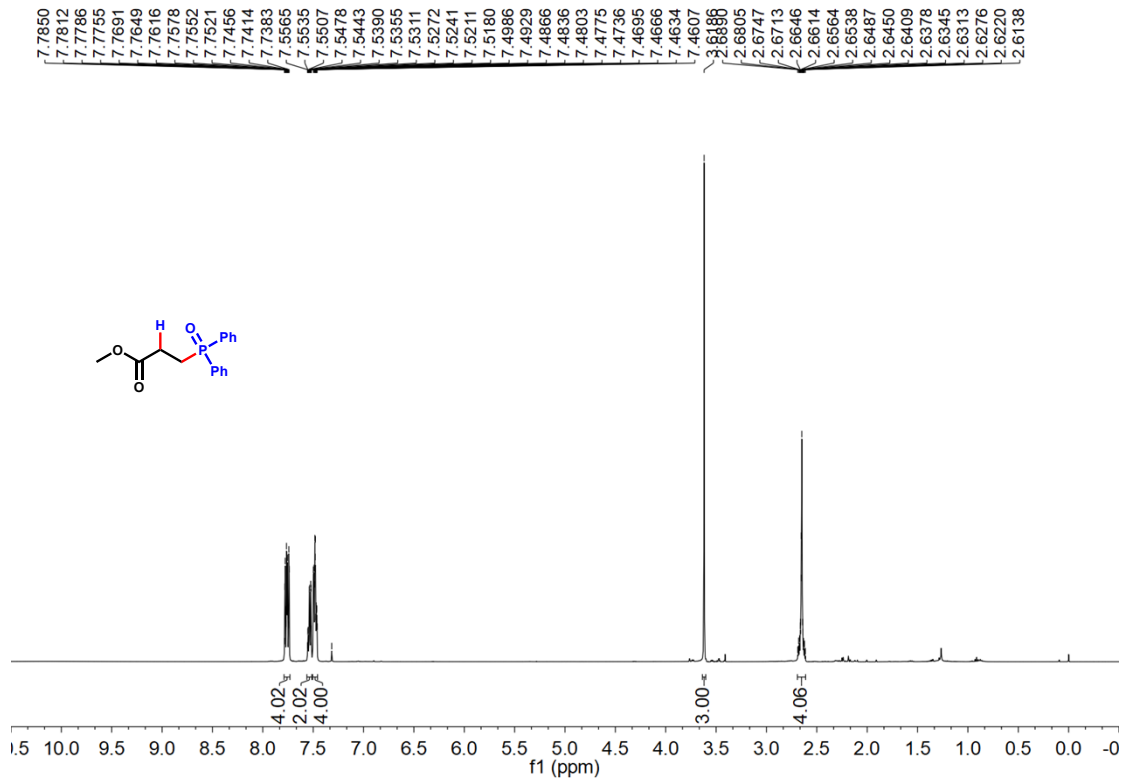

<sup>13</sup>C NMR

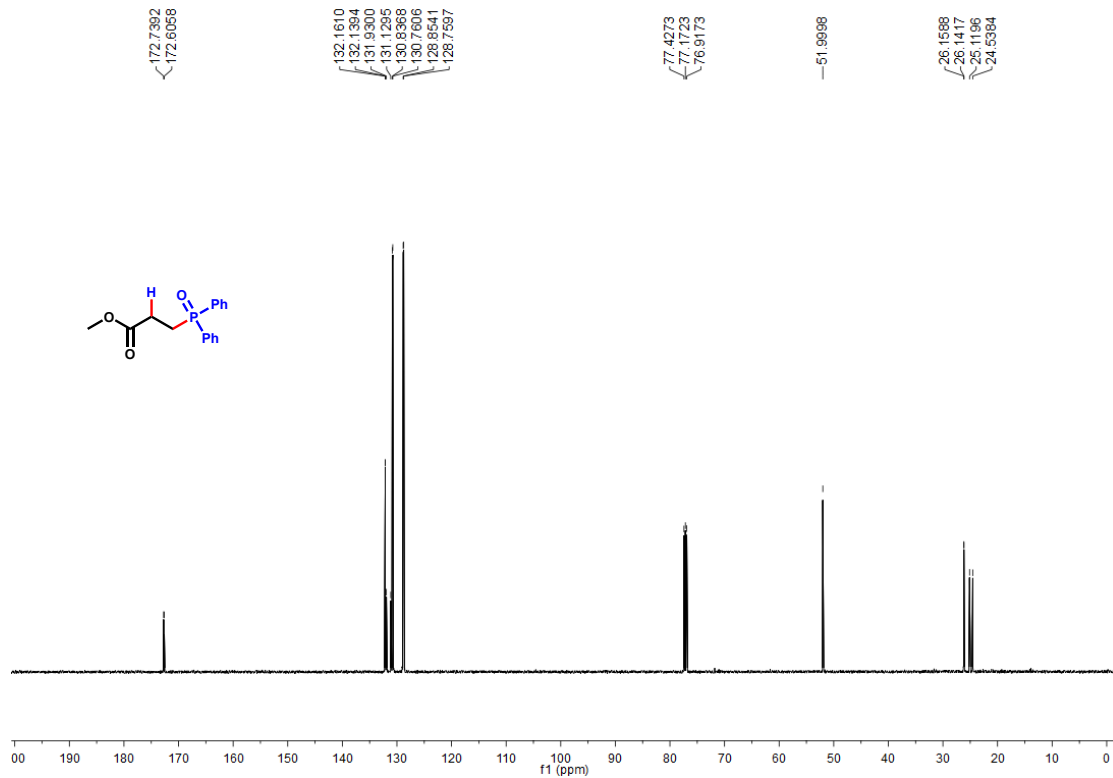

### <sup>31</sup>P NMR

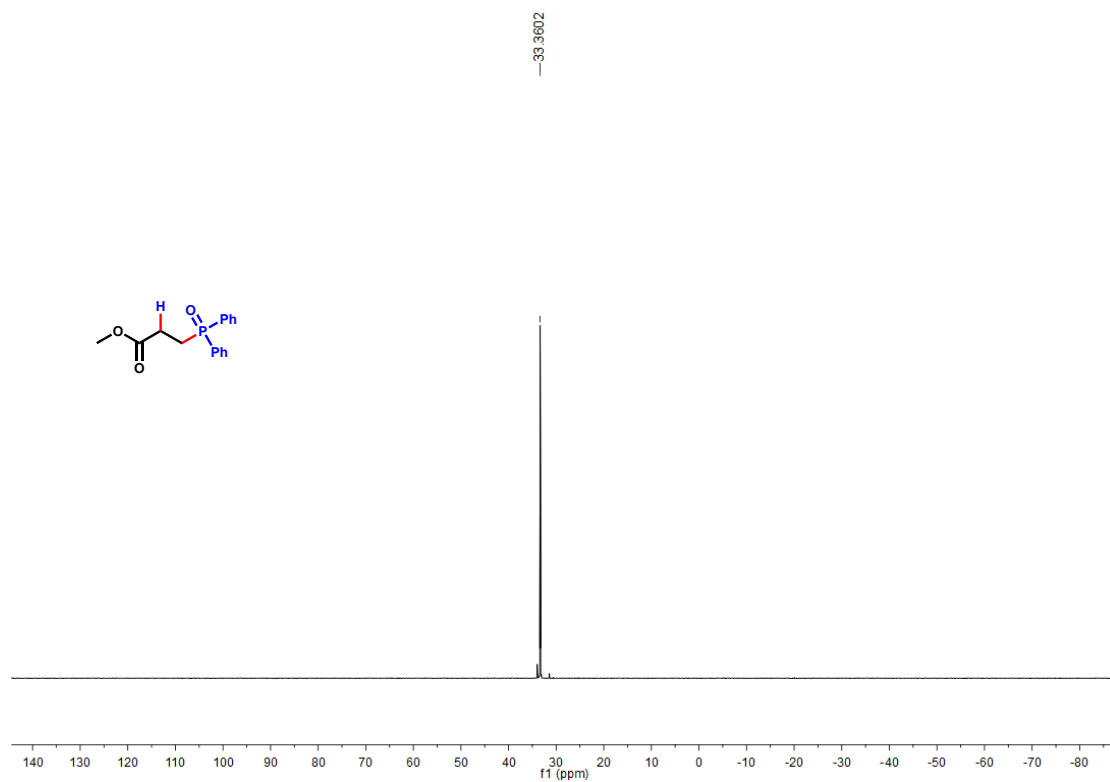

23c

### <sup>1</sup>H NMR

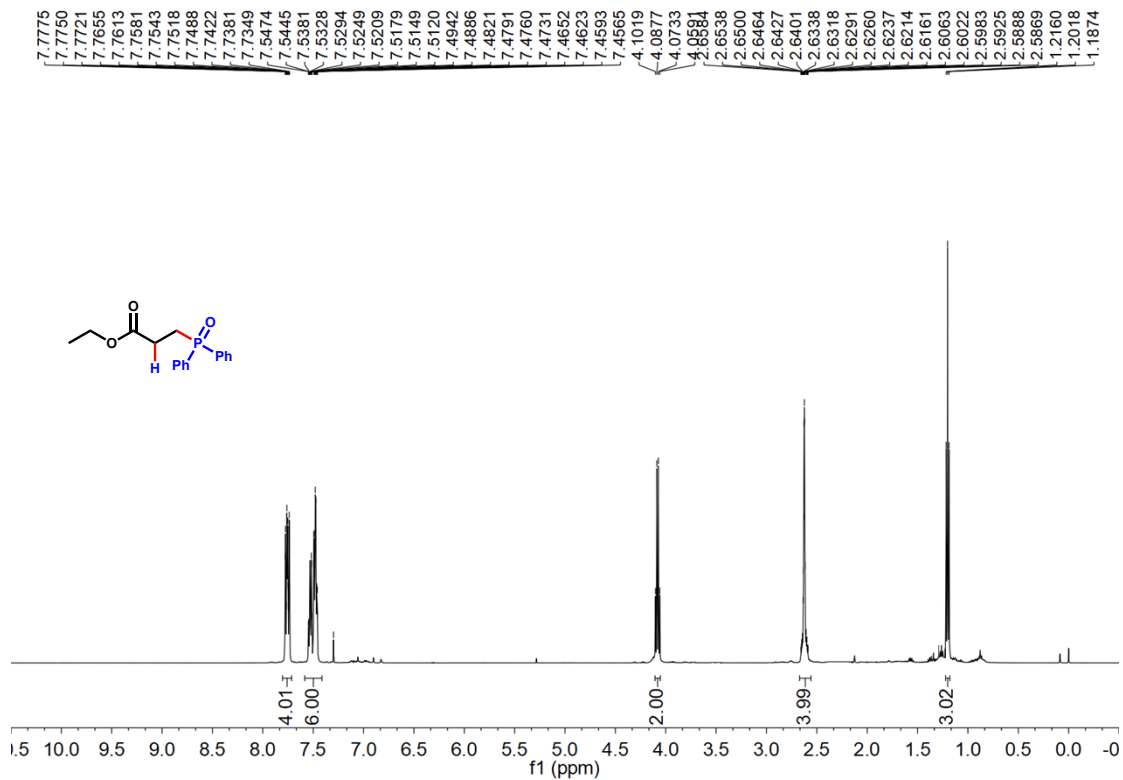



### <sup>13</sup>C NMR

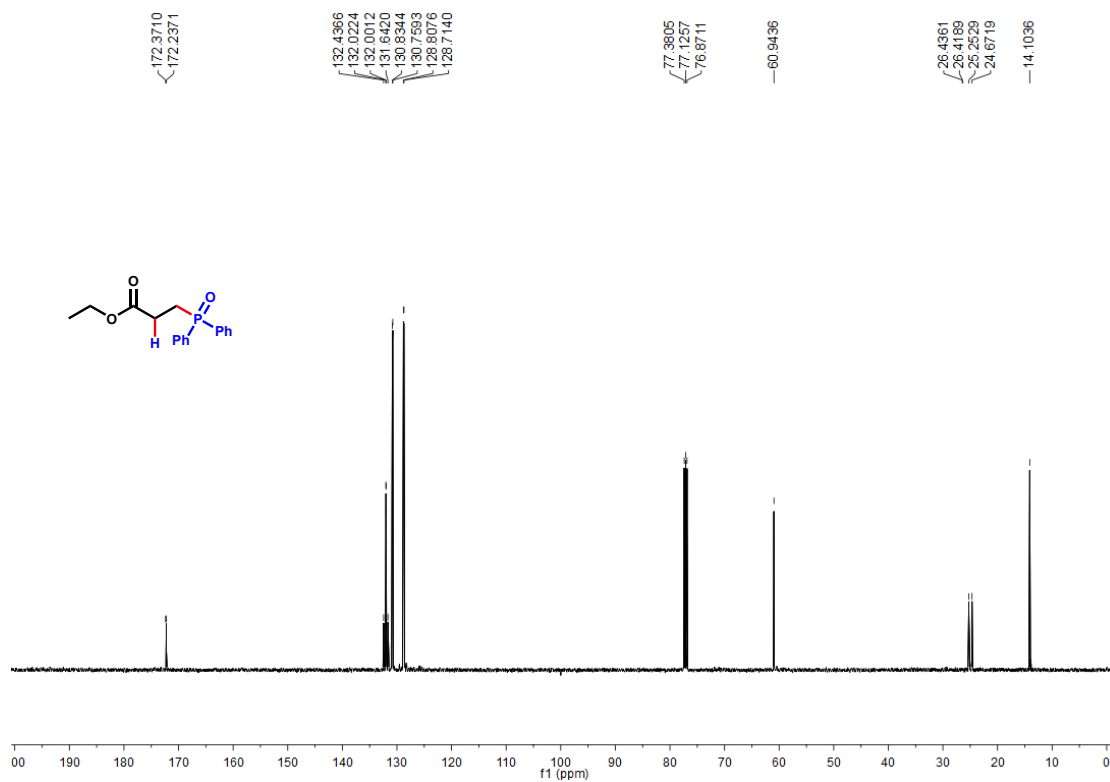

### <sup>31</sup>P NMR

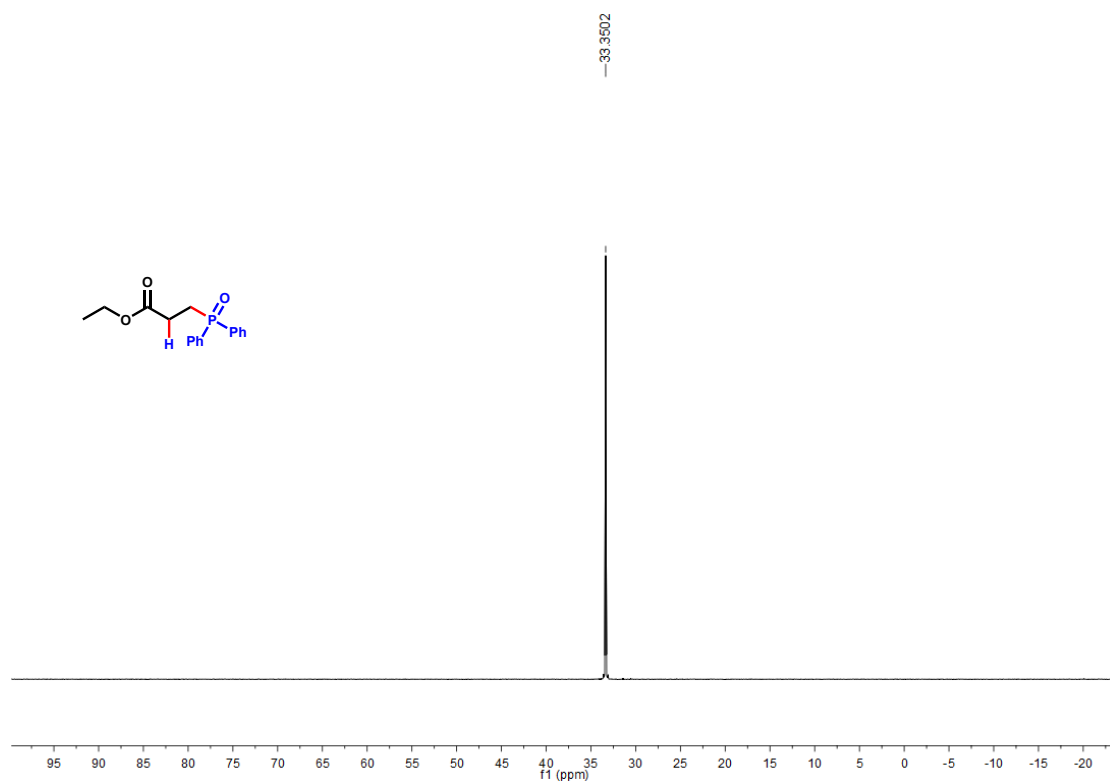

24c

<sup>1</sup>H NMR

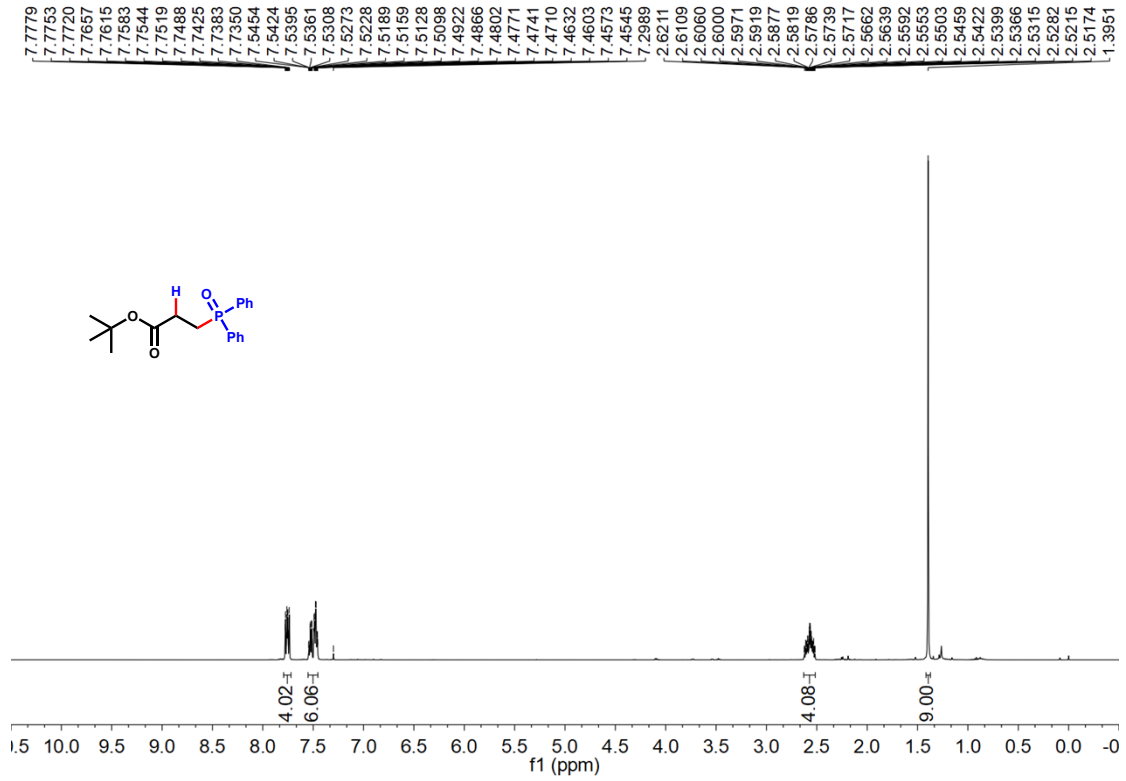

<sup>13</sup>C NMR

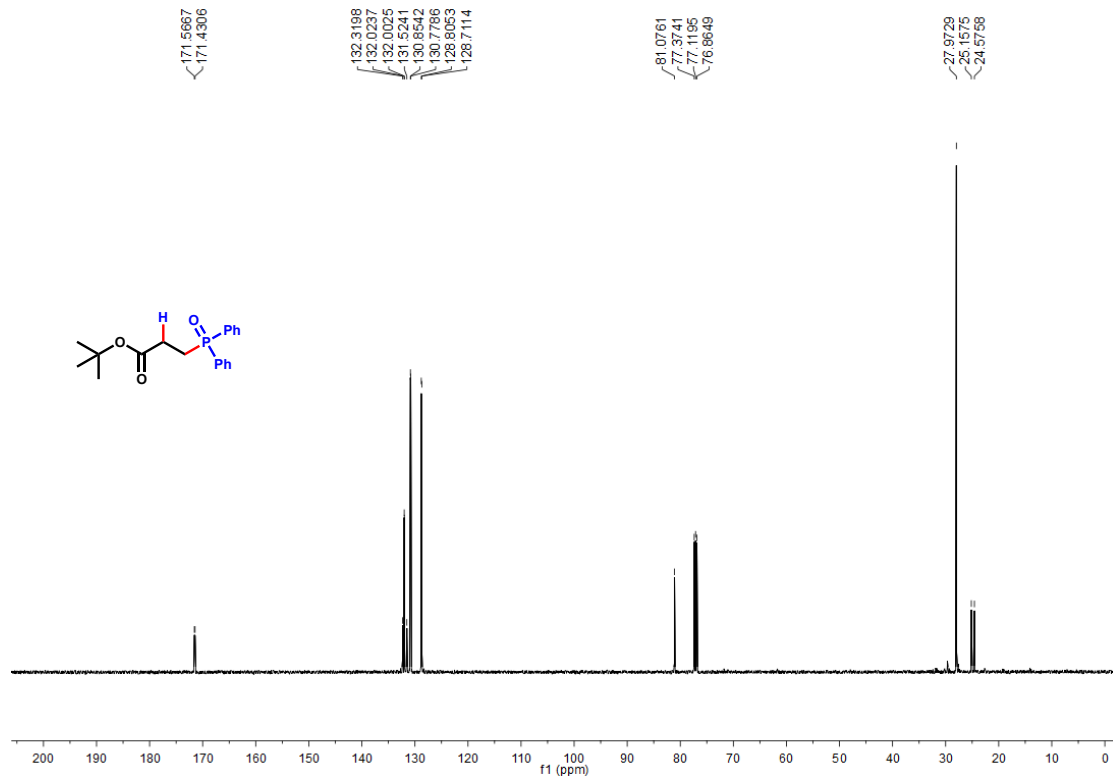

### <sup>31</sup>P NMR

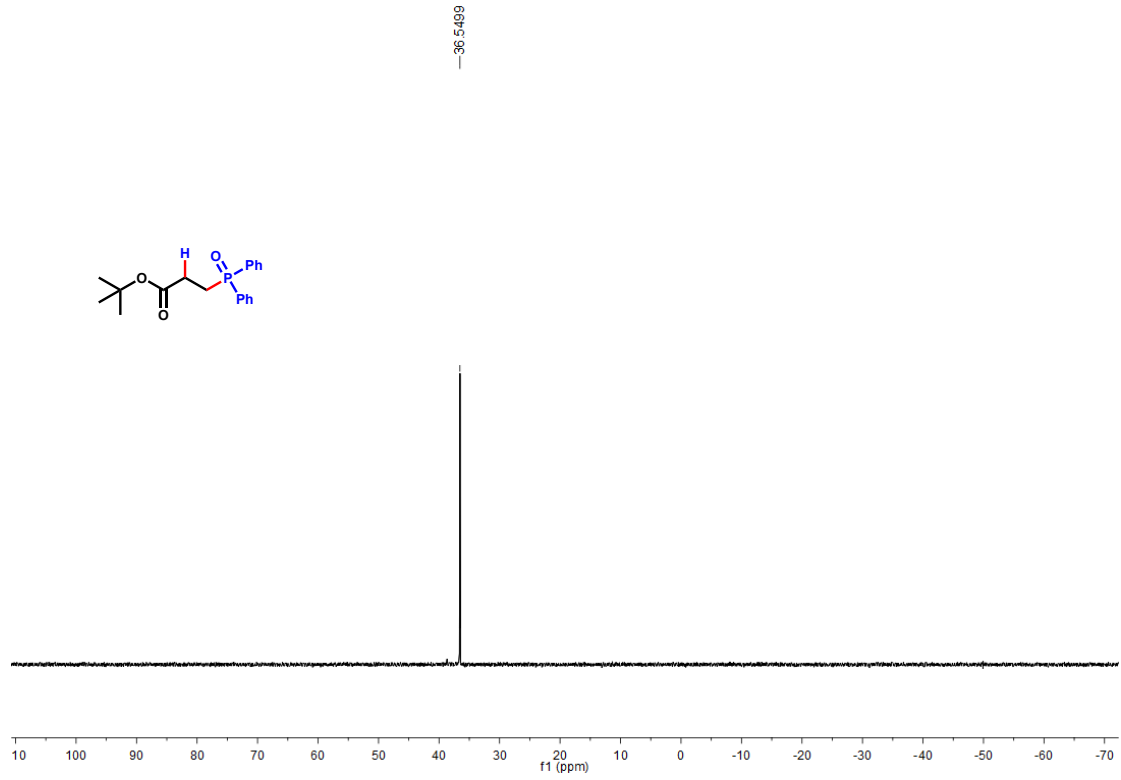

29c

### <sup>1</sup>H NMR

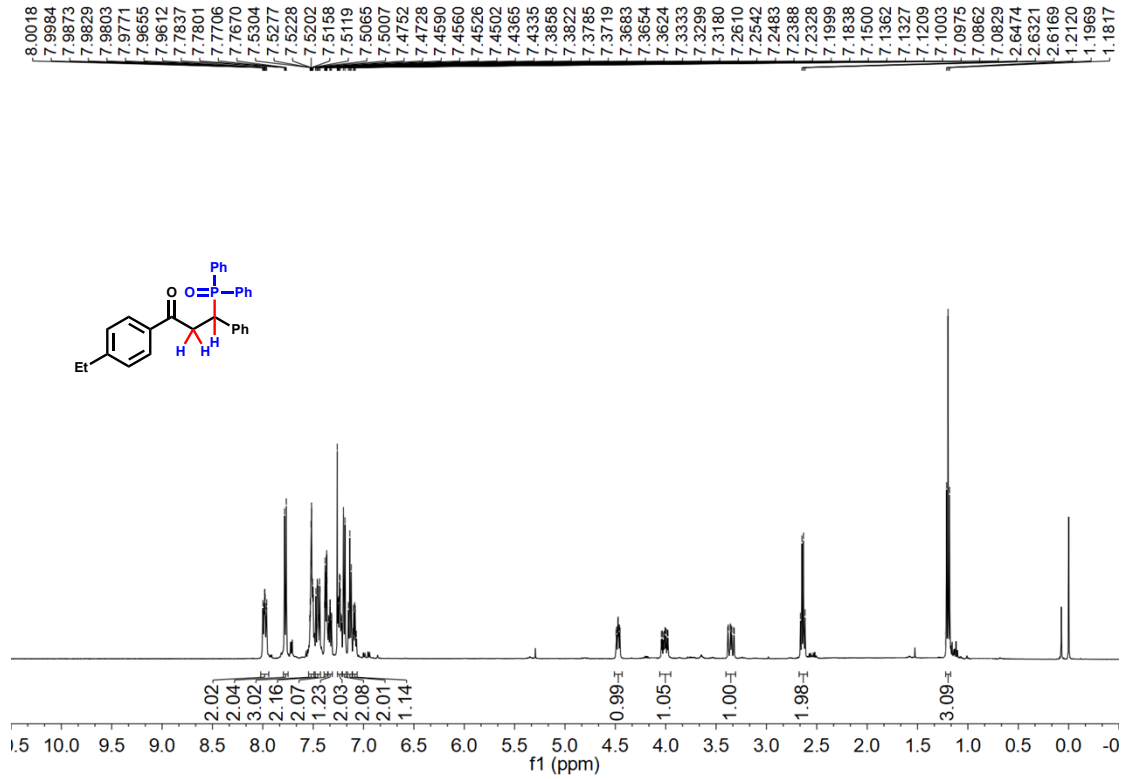

### <sup>13</sup>C NMR

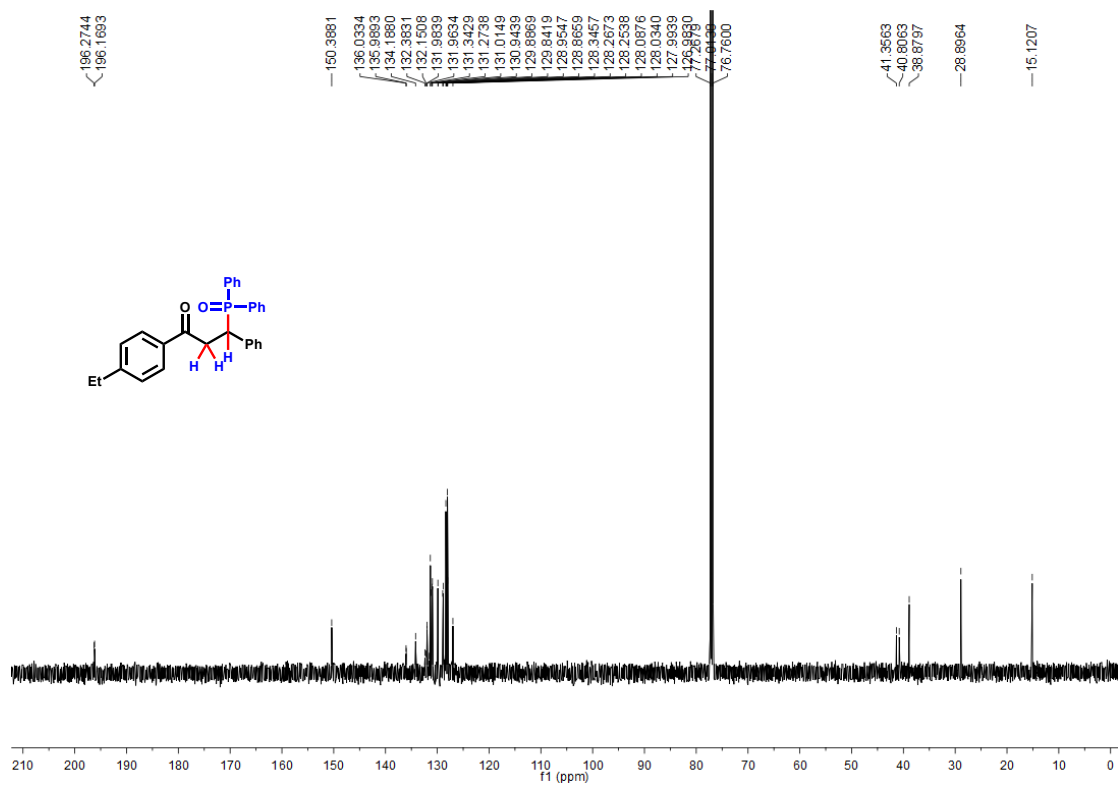

### <sup>31</sup>P NMR

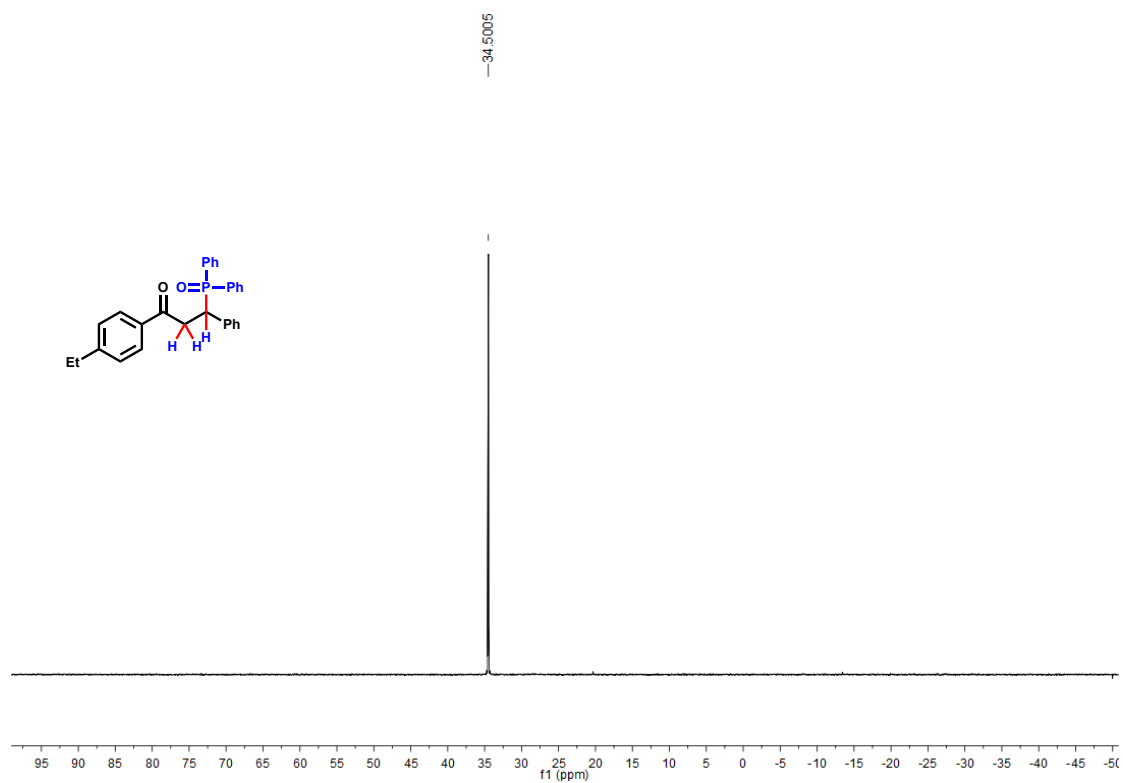

30c

<sup>1</sup>H NMR

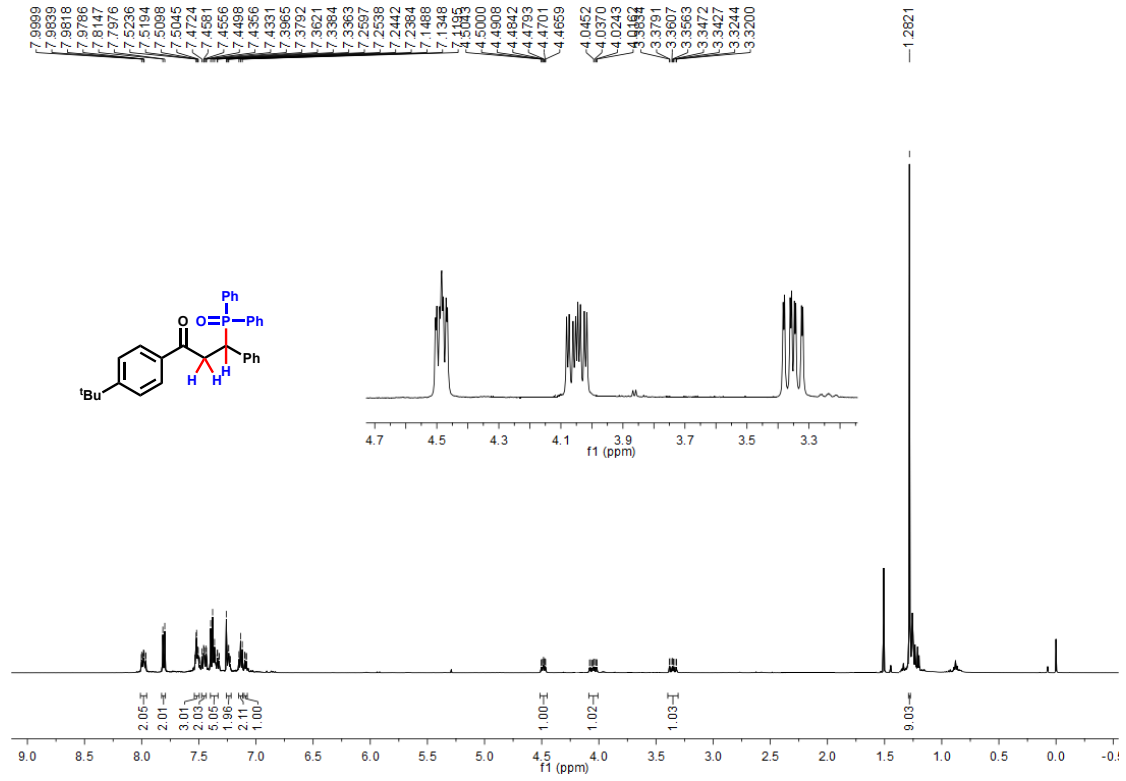

<sup>13</sup>C NMR

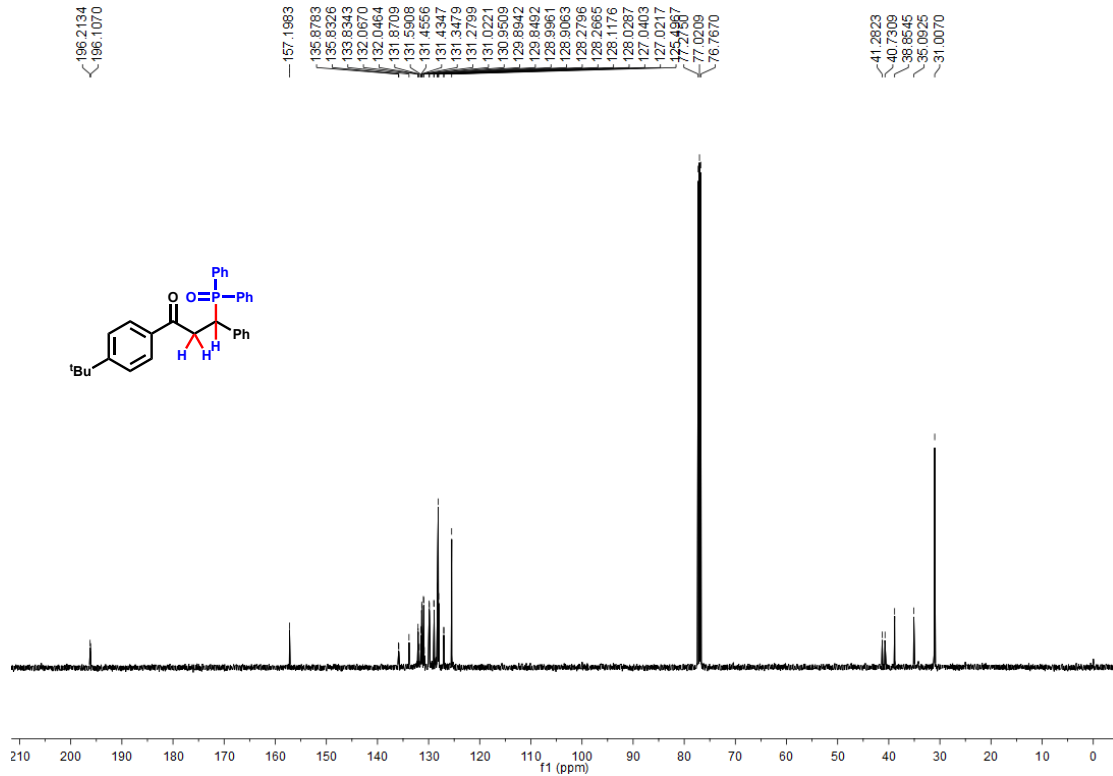

### <sup>31</sup>P NMR

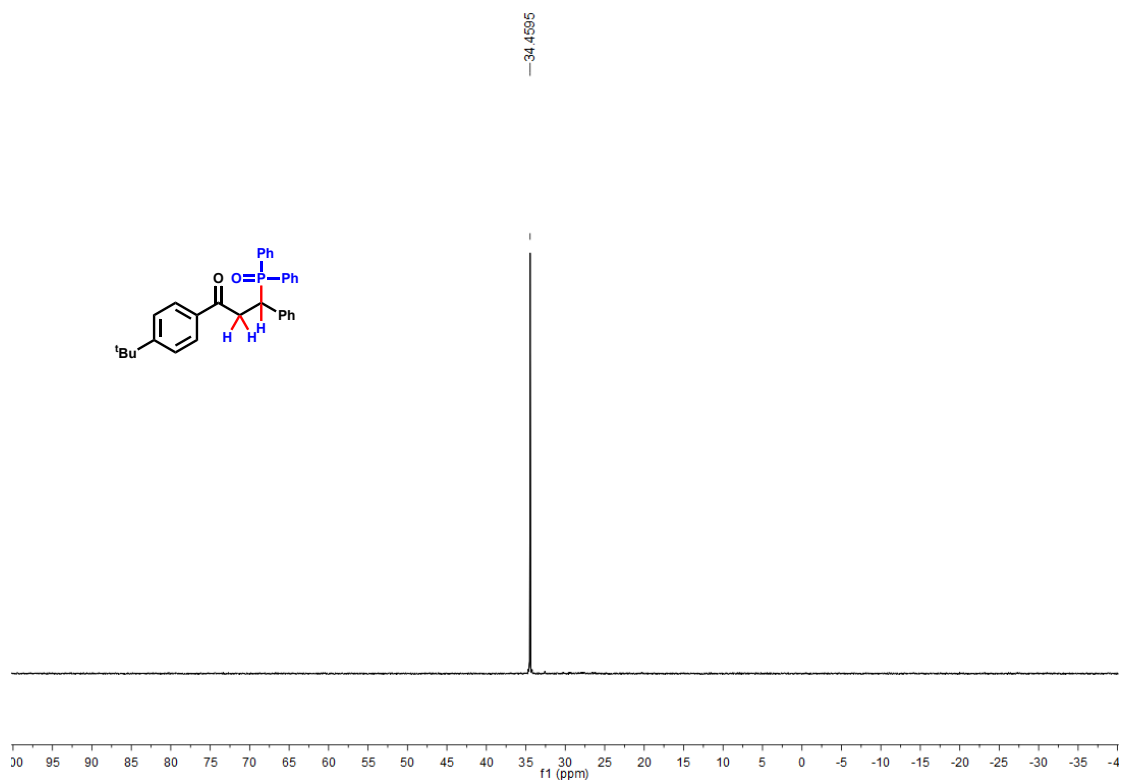

31c

### <sup>1</sup>H NMR

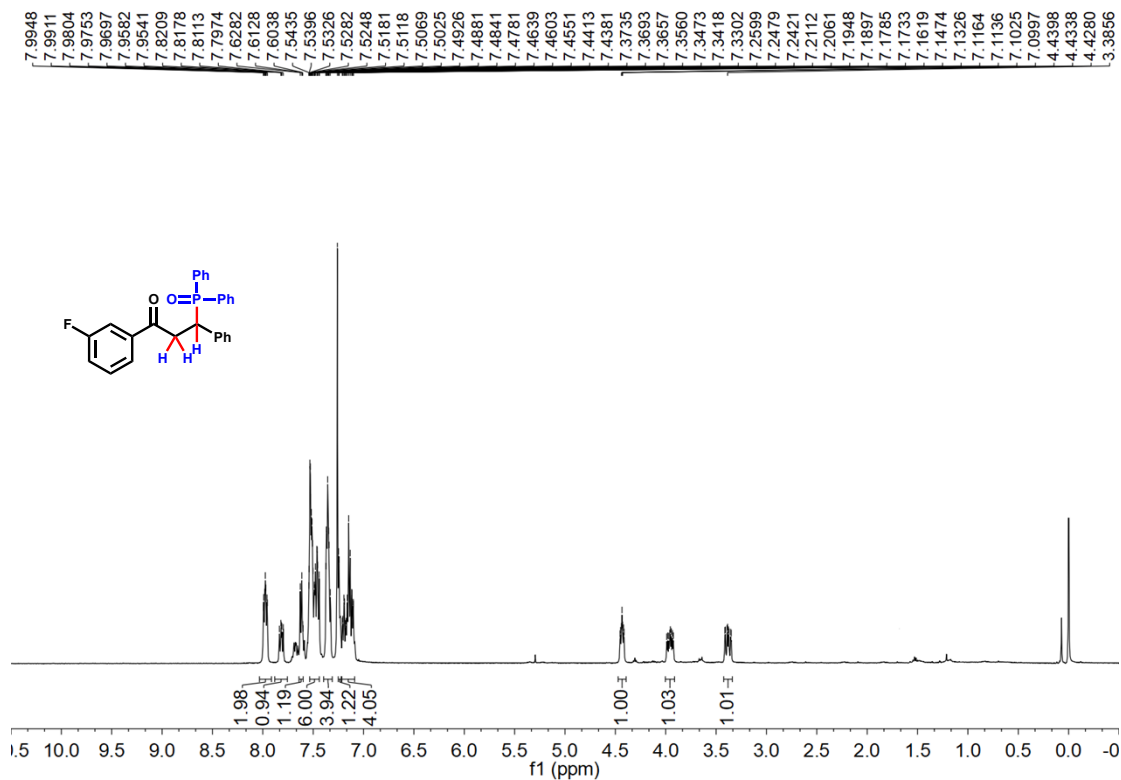

### <sup>13</sup>C NMR

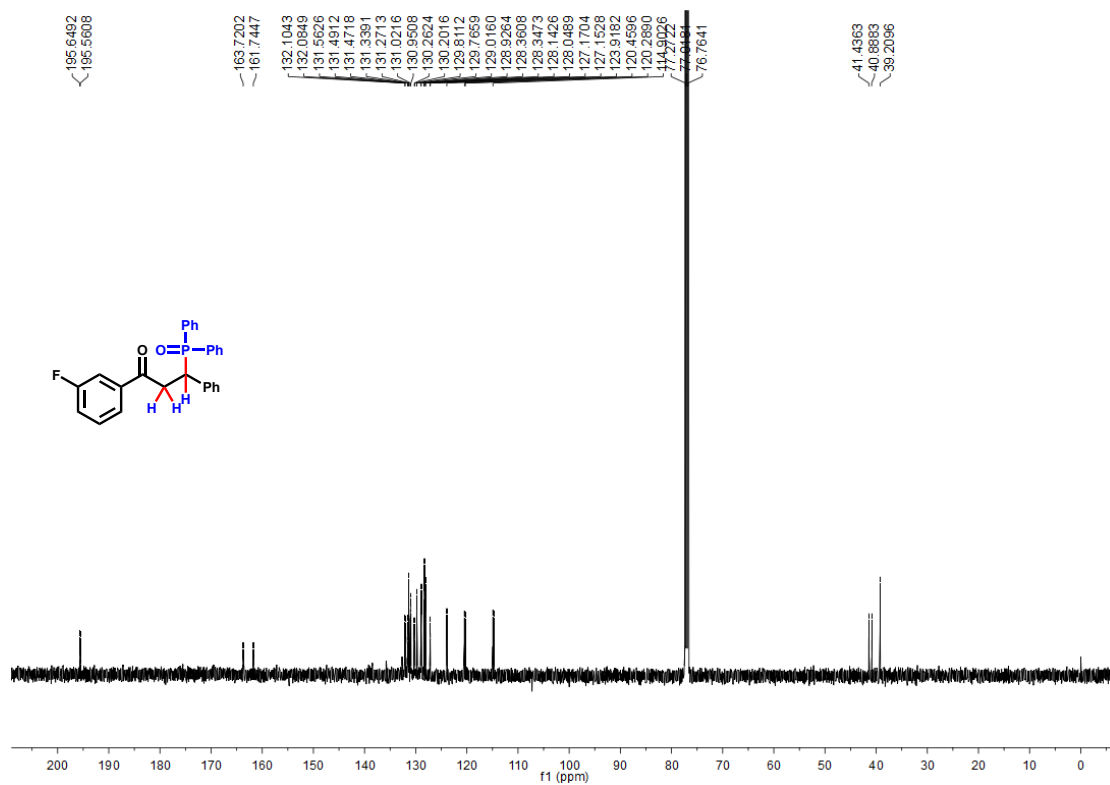

### <sup>19</sup>F NMR

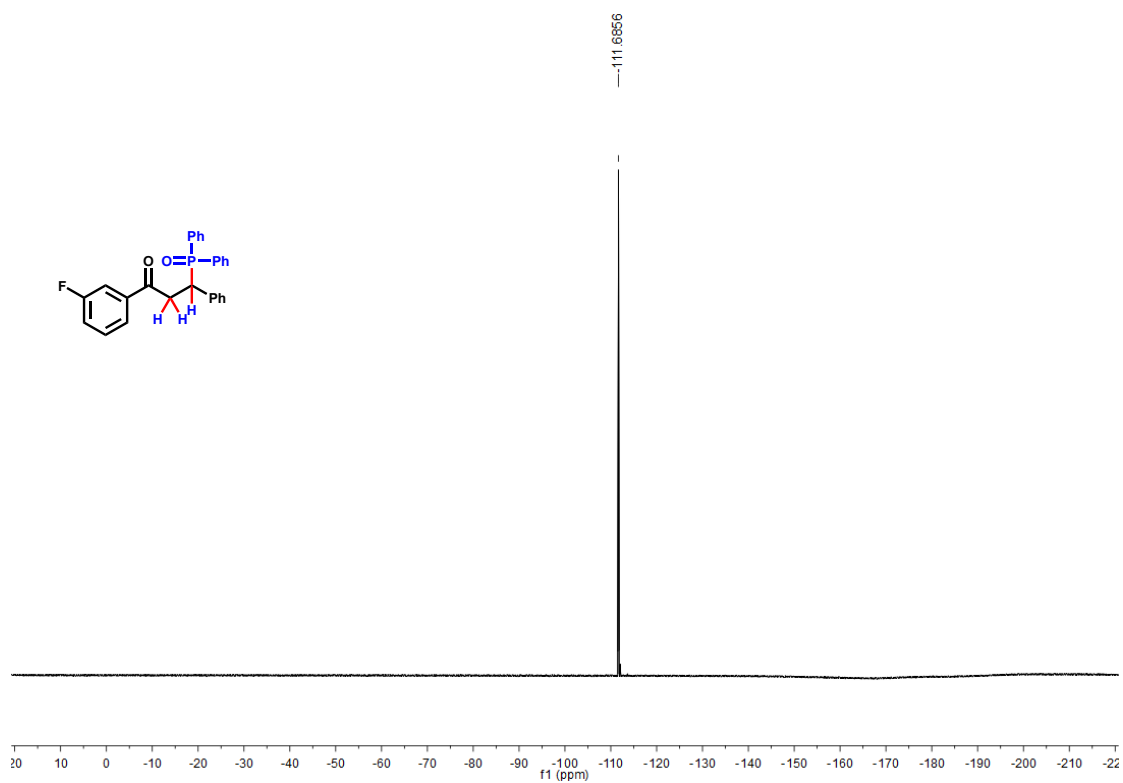

**<sup>31</sup>P NMR**

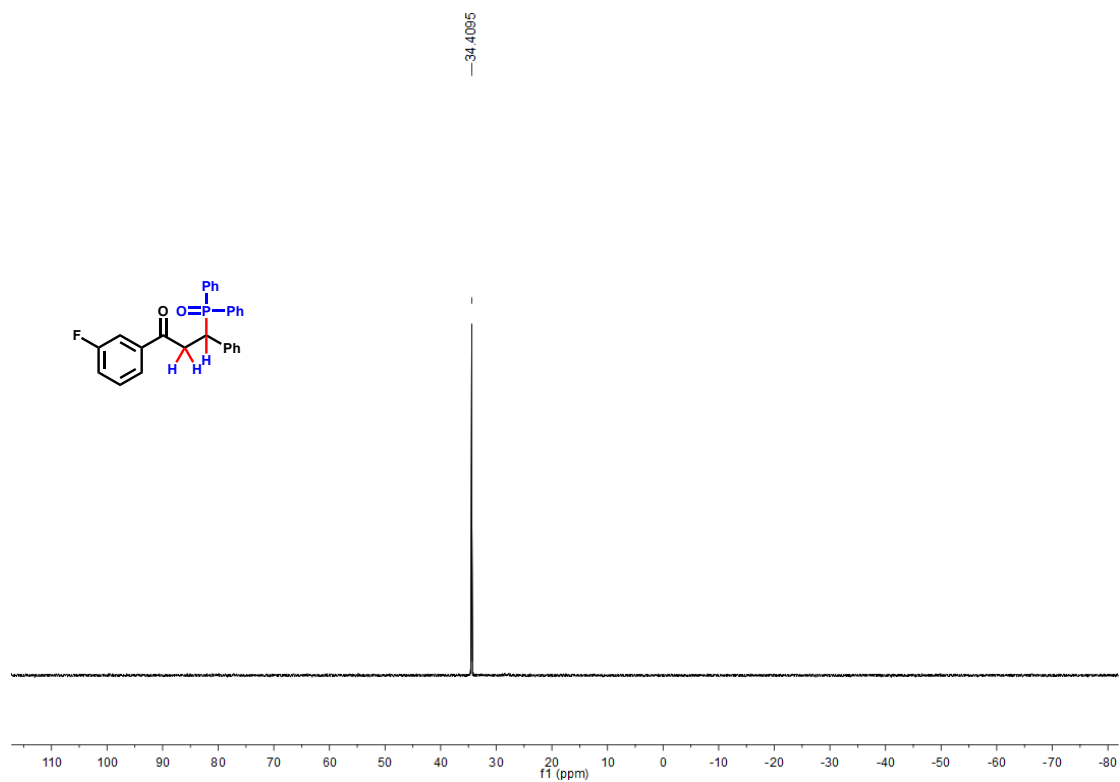

**32c**

**<sup>1</sup>H NMR**

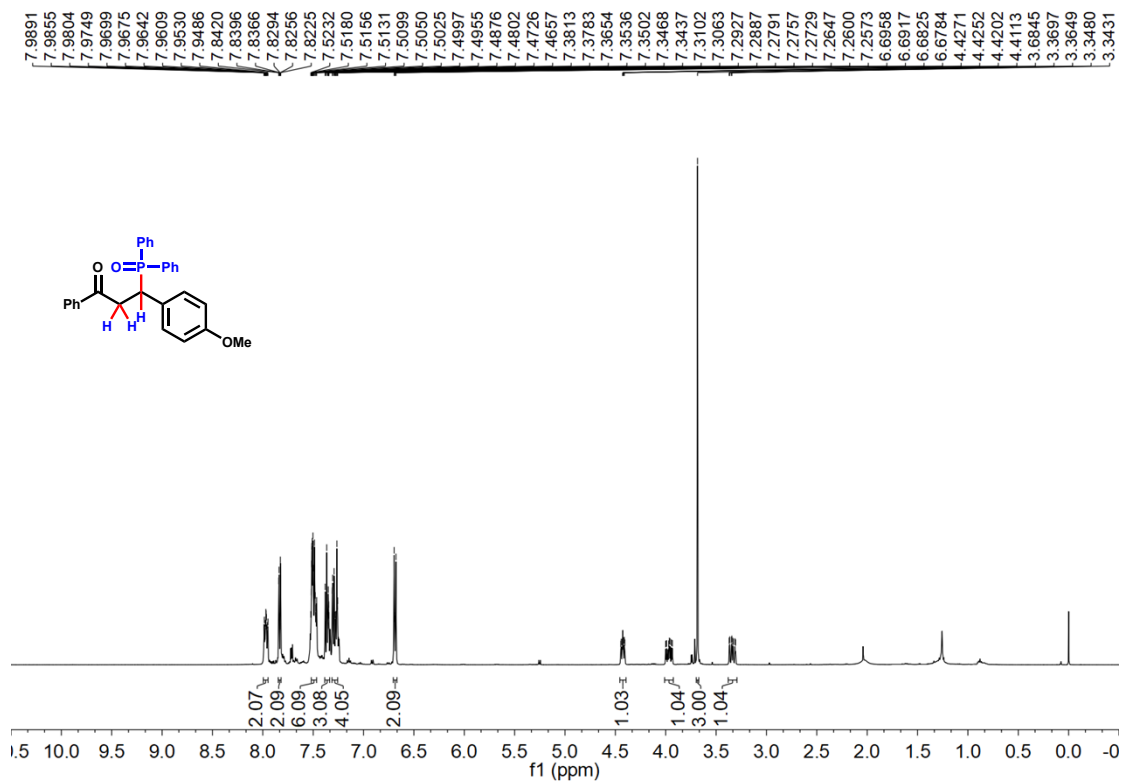



### <sup>13</sup>C NMR

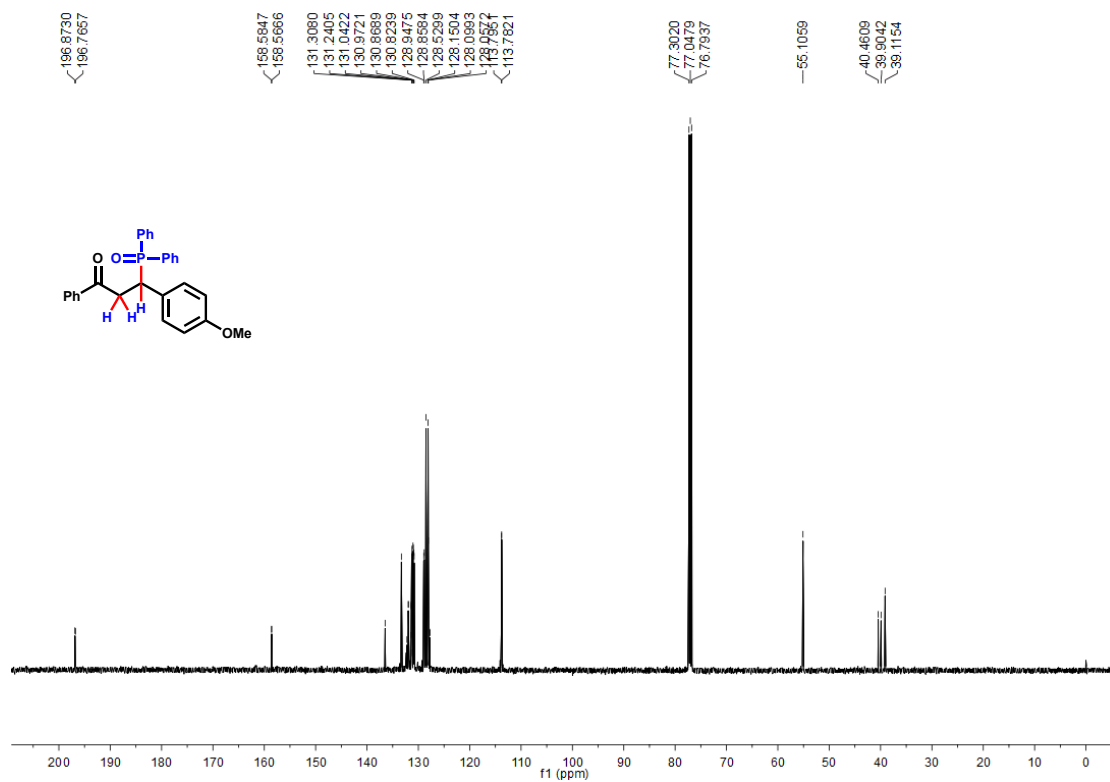

### <sup>31</sup>P NMR

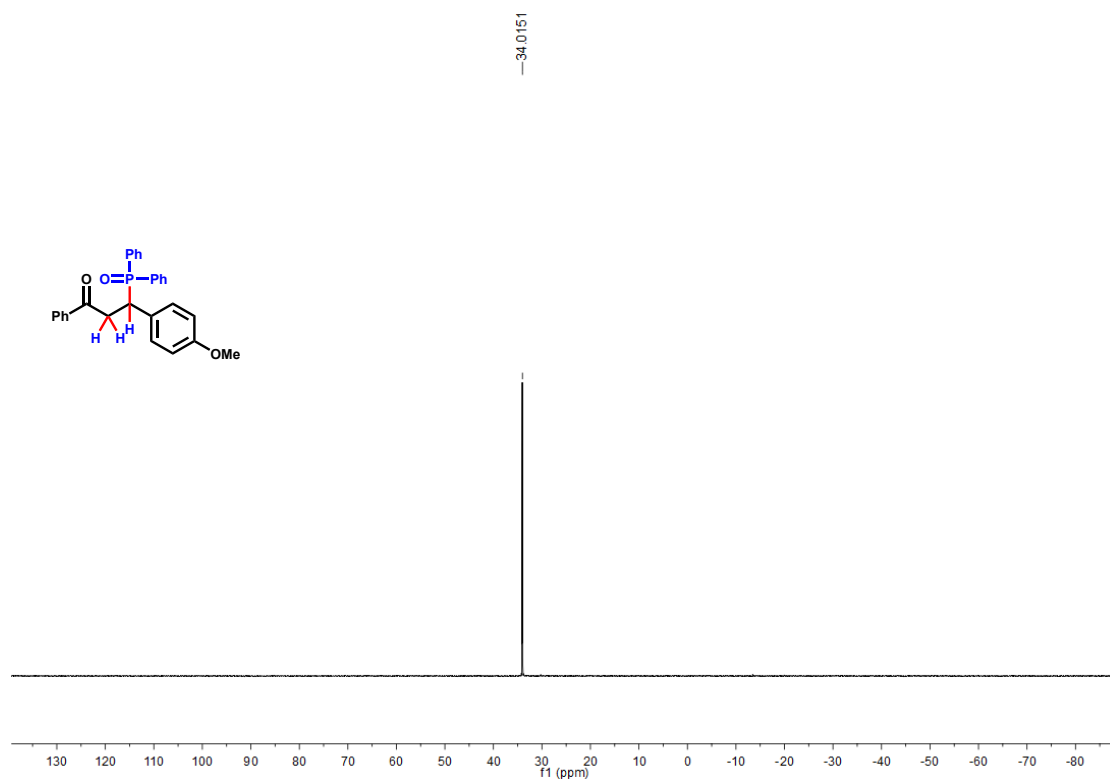

33c

# <sup>1</sup>H NMR

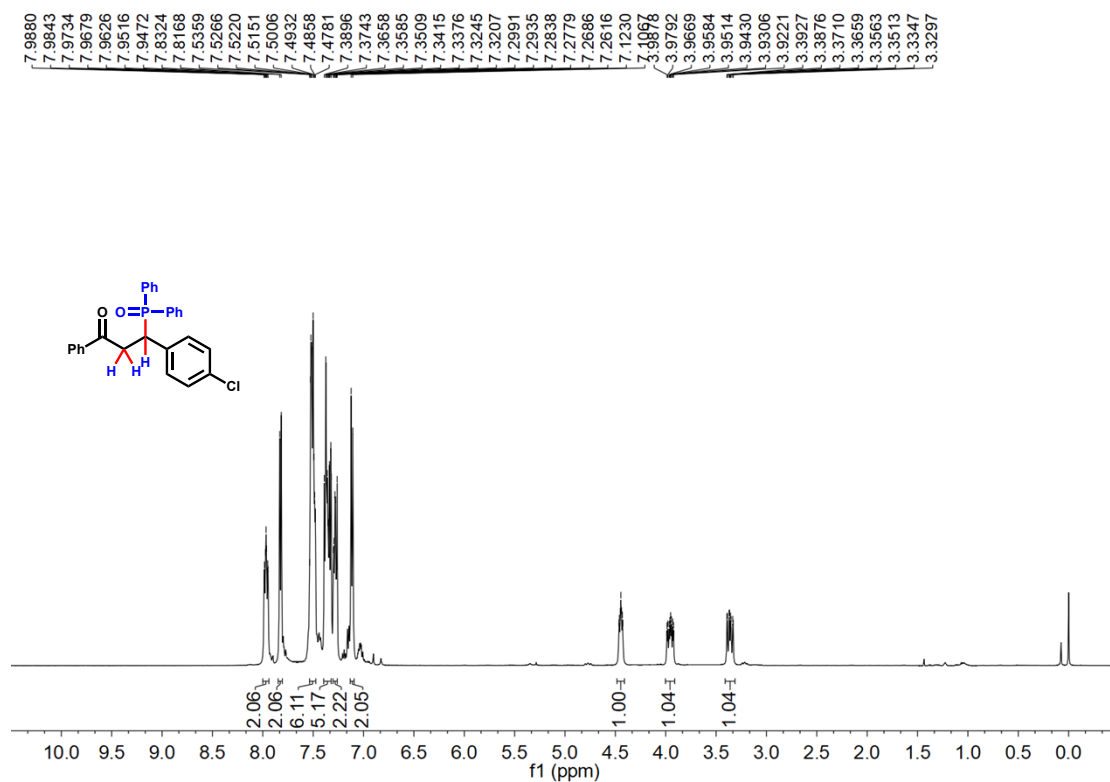

# <sup>13</sup>C NMR

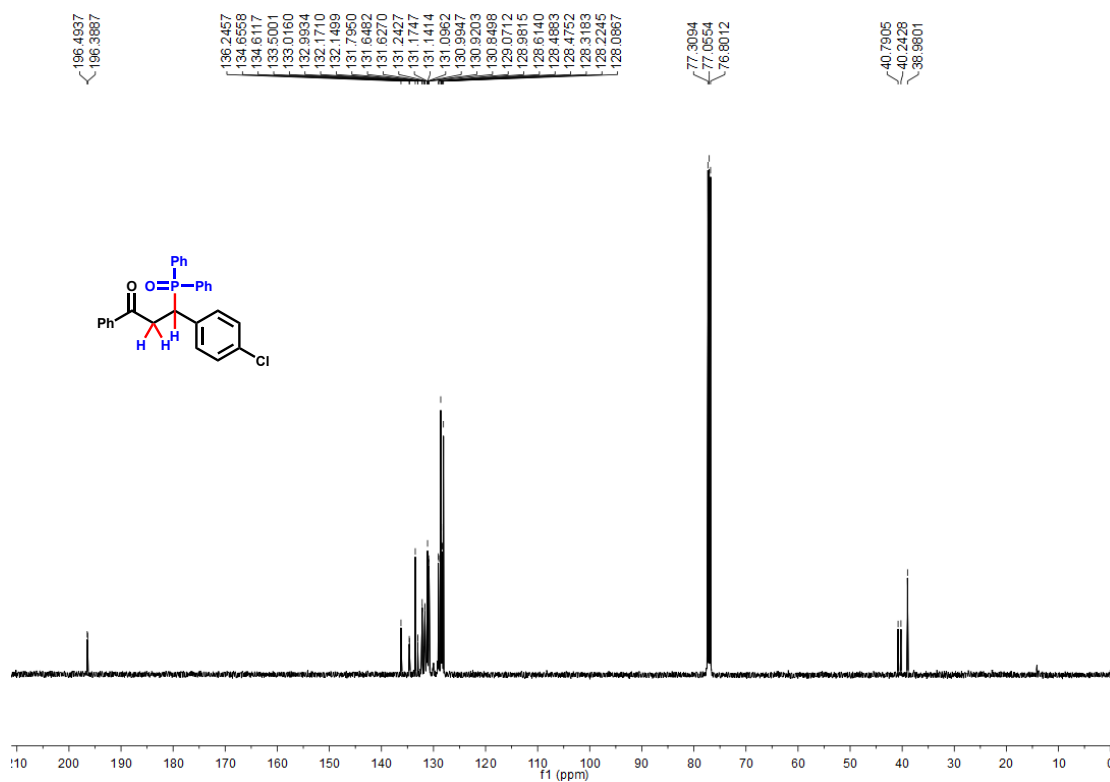

### <sup>31</sup>P NMR

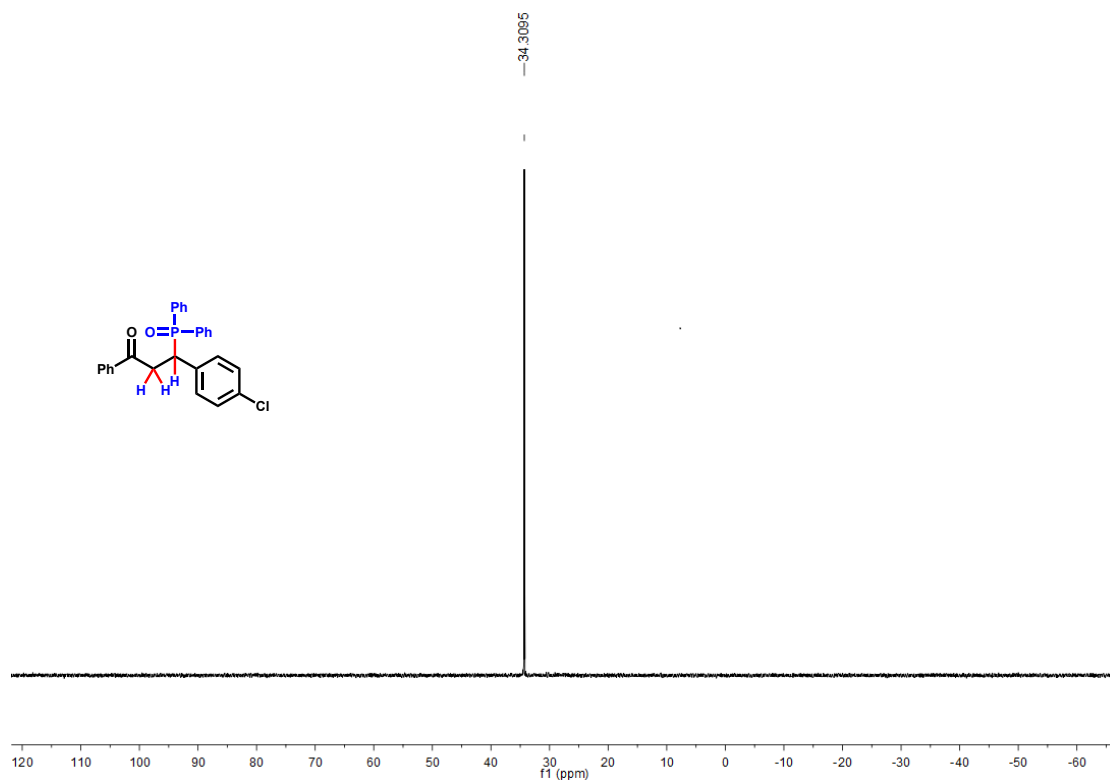

34c

### <sup>1</sup>H NMR

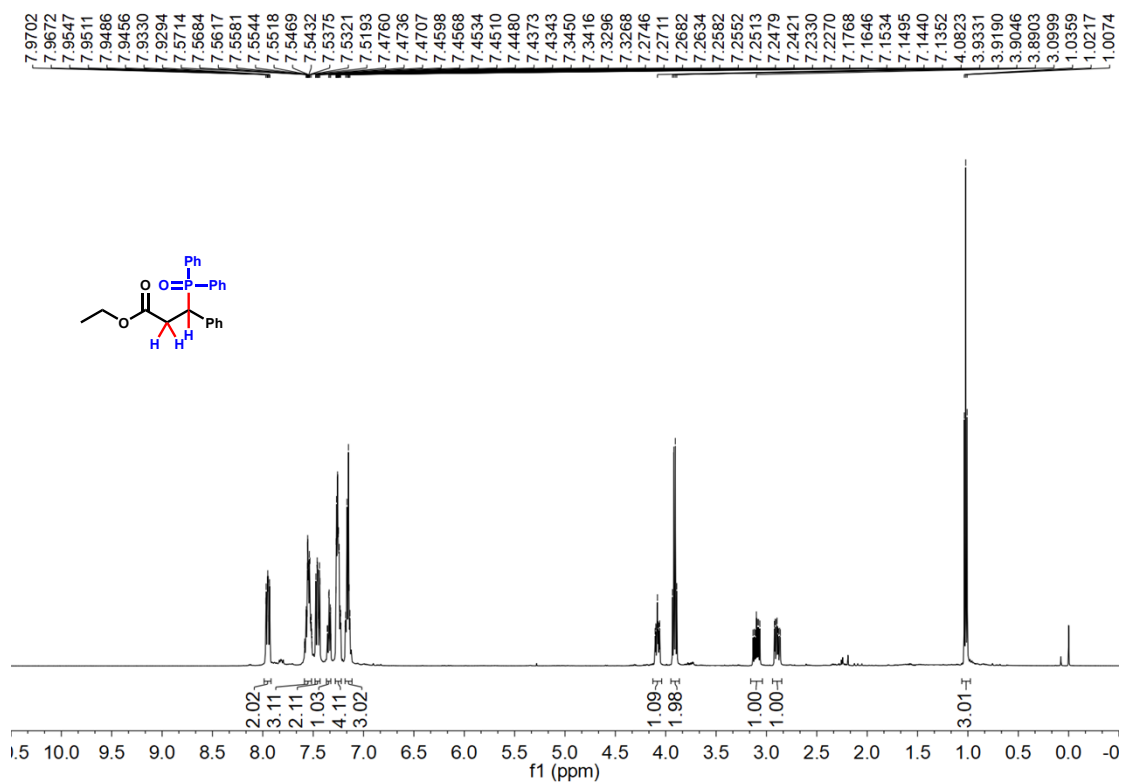

### <sup>13</sup>C NMR

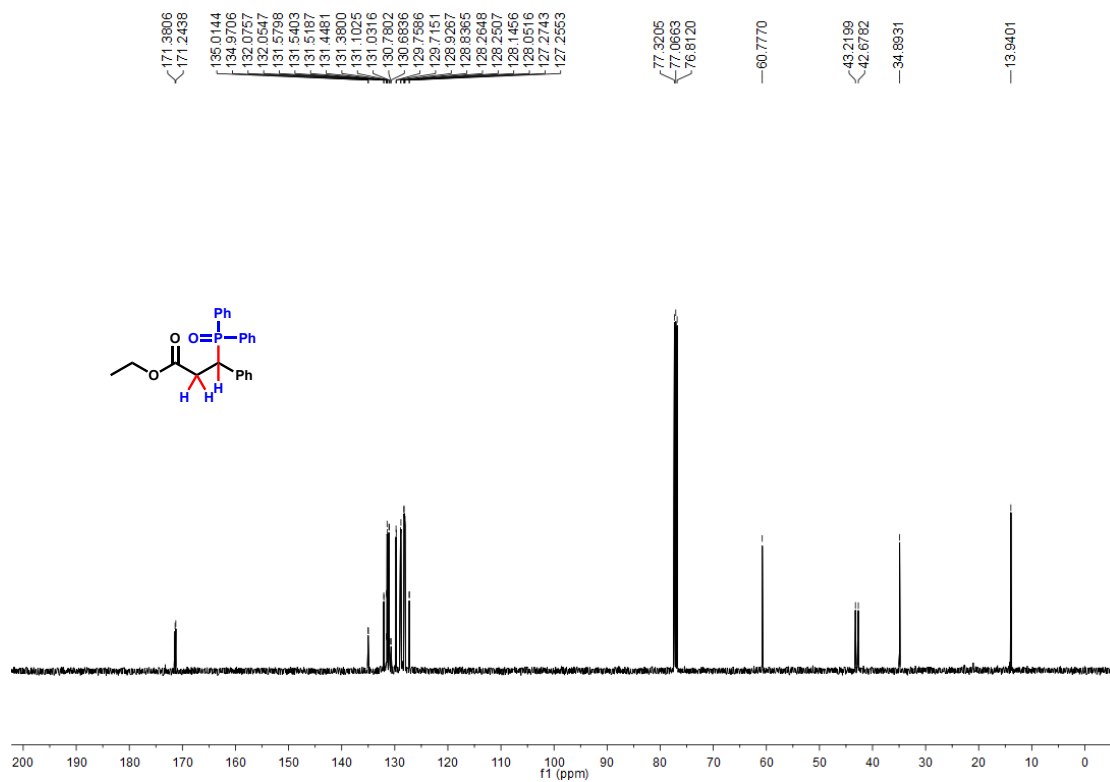

35c

### <sup>1</sup>H NMR

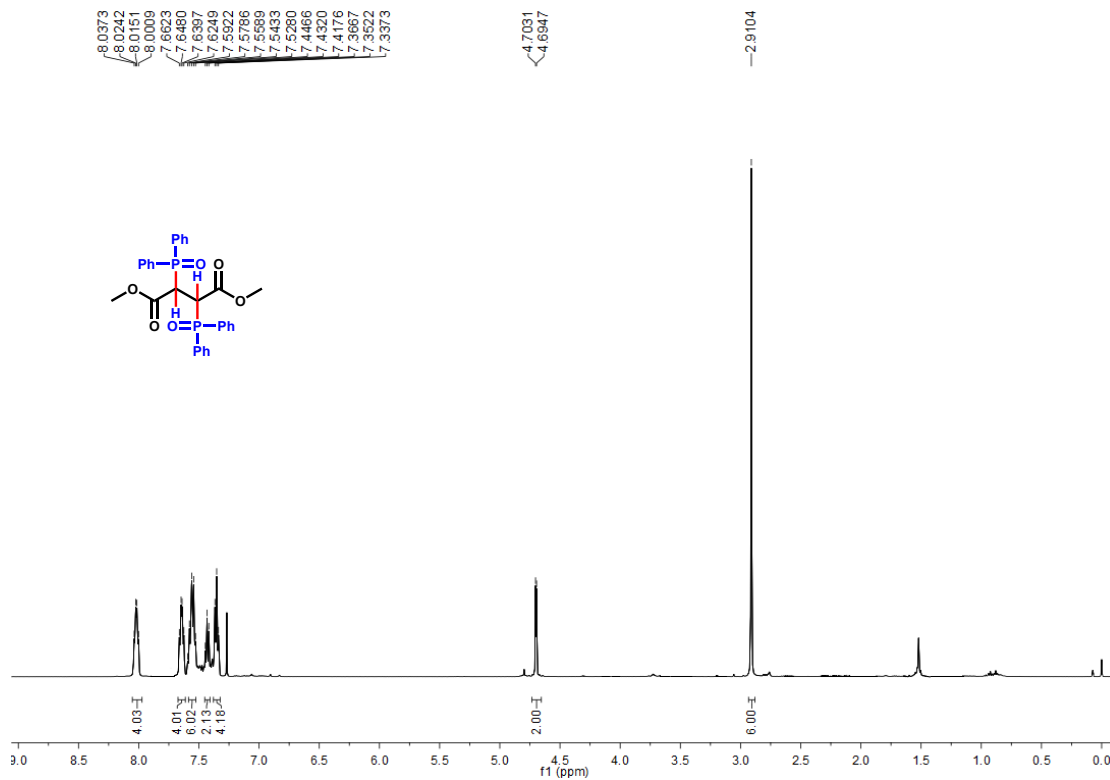

S68

### <sup>13</sup>C NMR

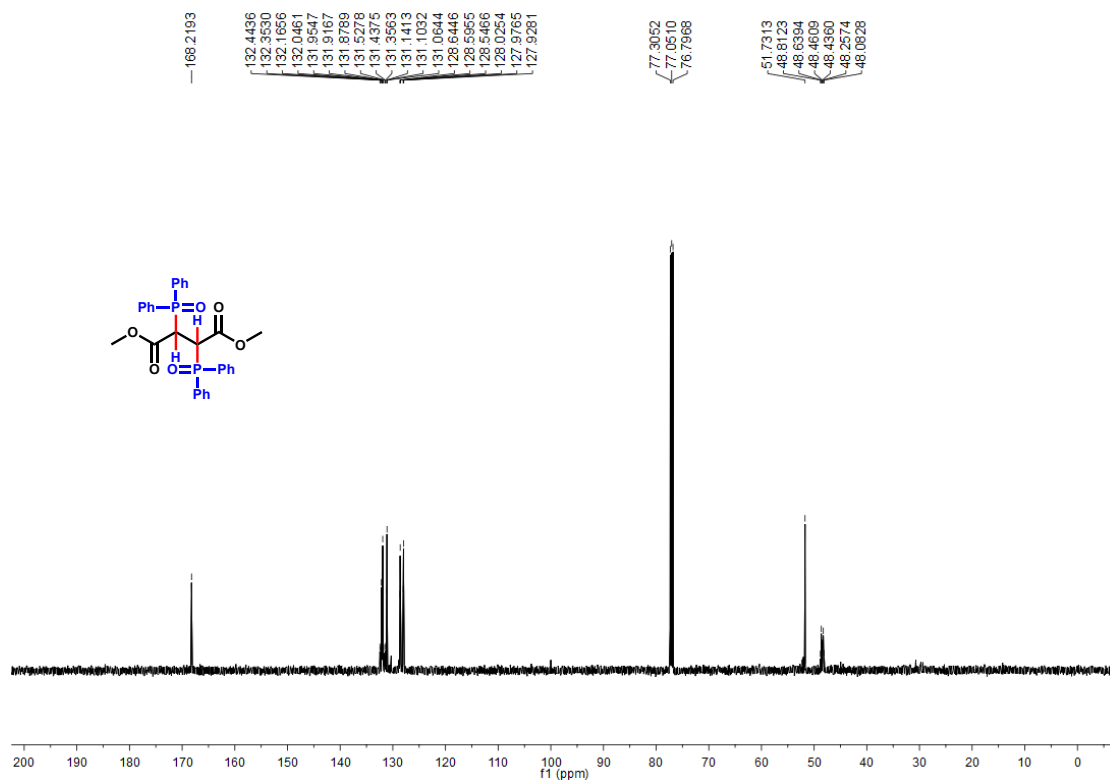

### <sup>31</sup>P NMR

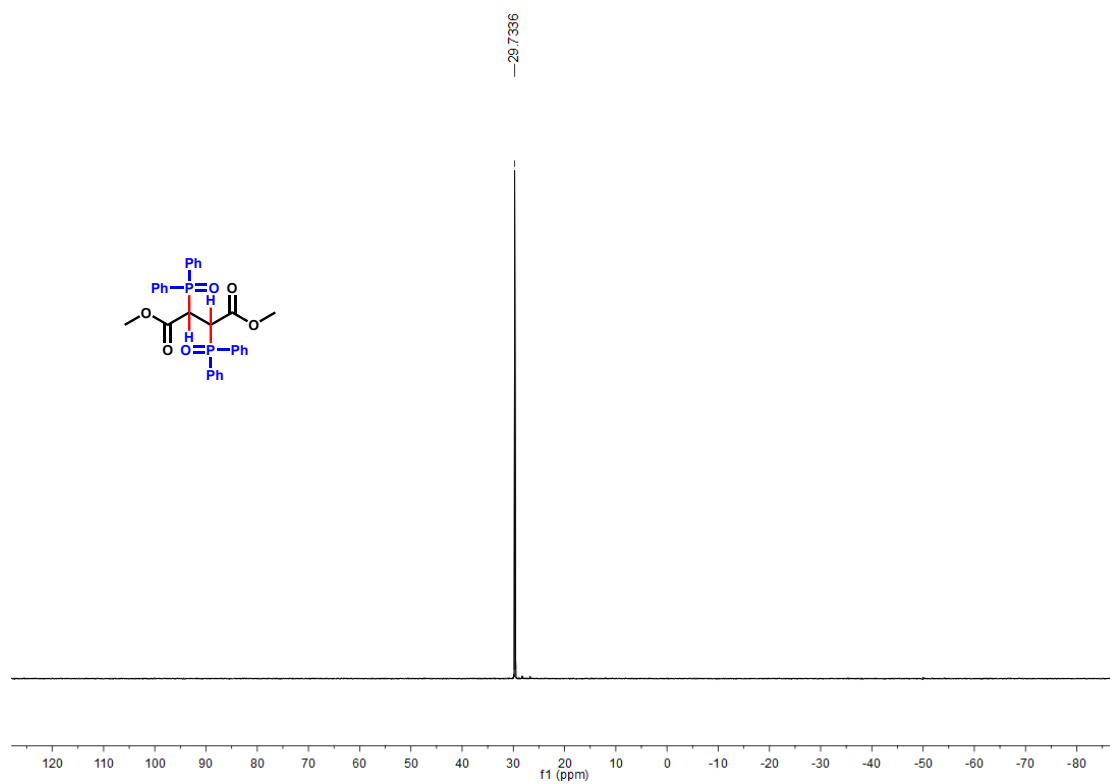

36c

<sup>1</sup>H NMR

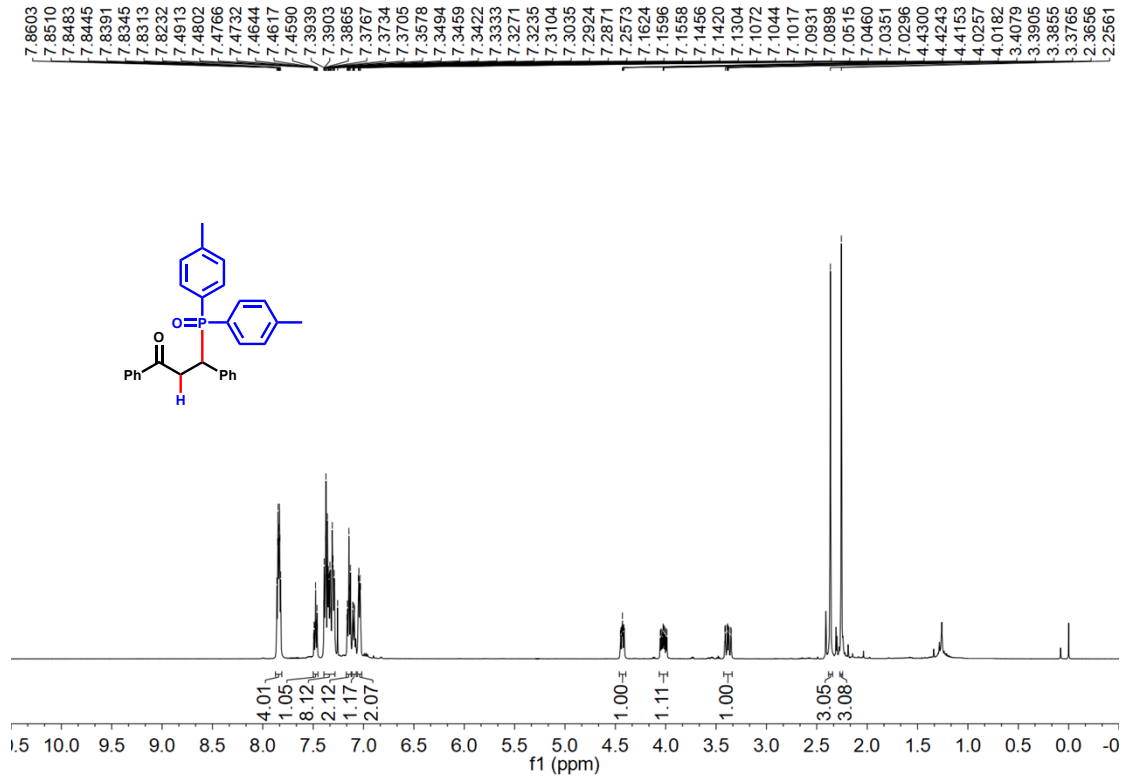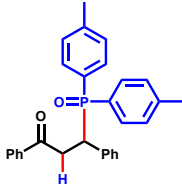

<sup>13</sup>C NMR

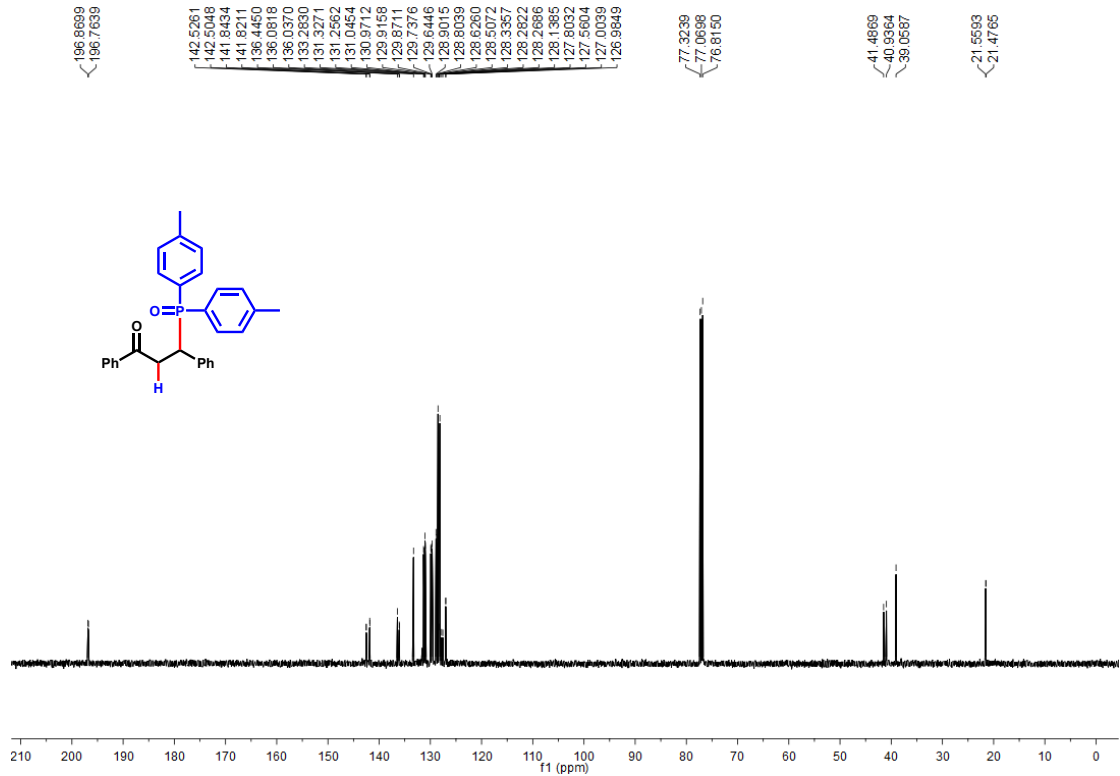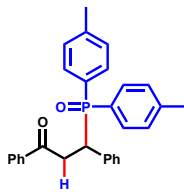

### <sup>31</sup>P NMR

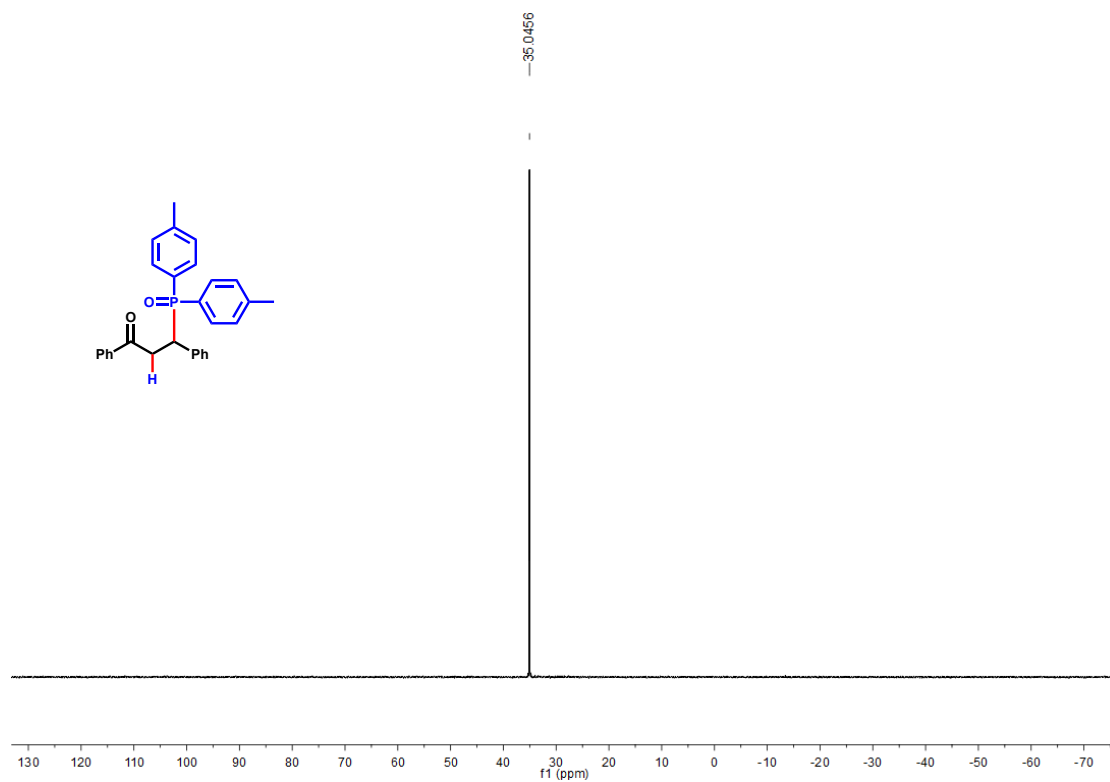

37c

### <sup>1</sup>H NMR

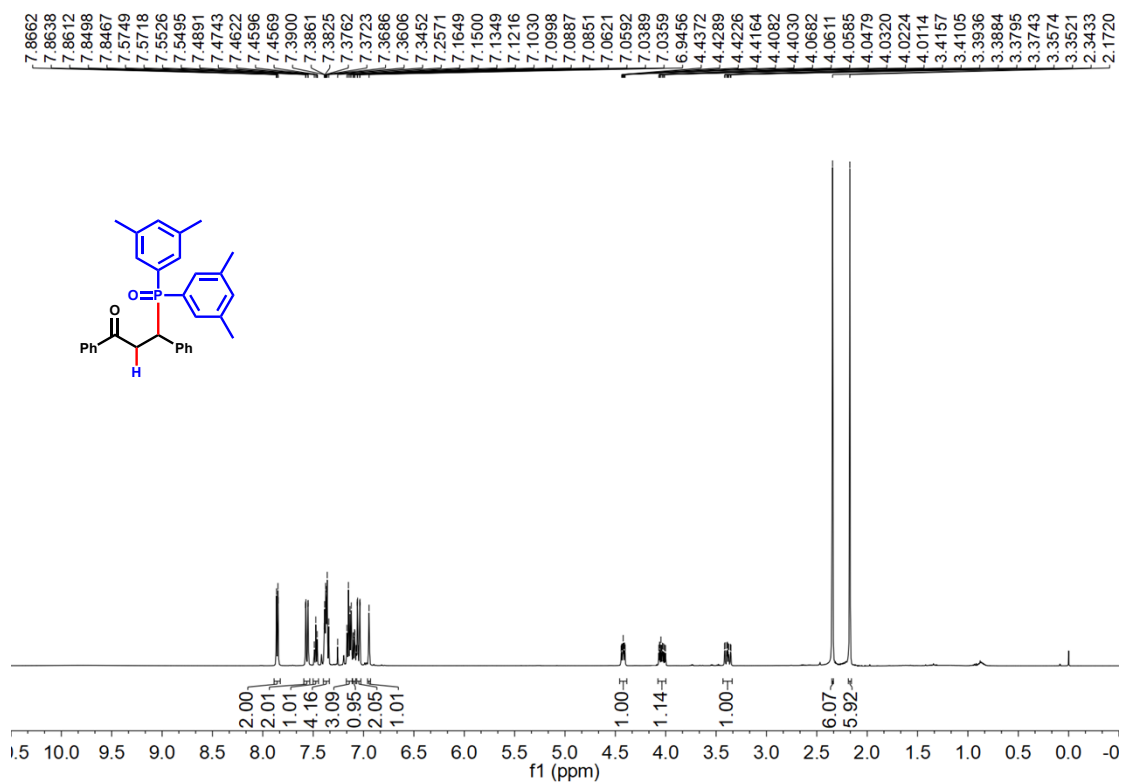

### <sup>13</sup>C NMR

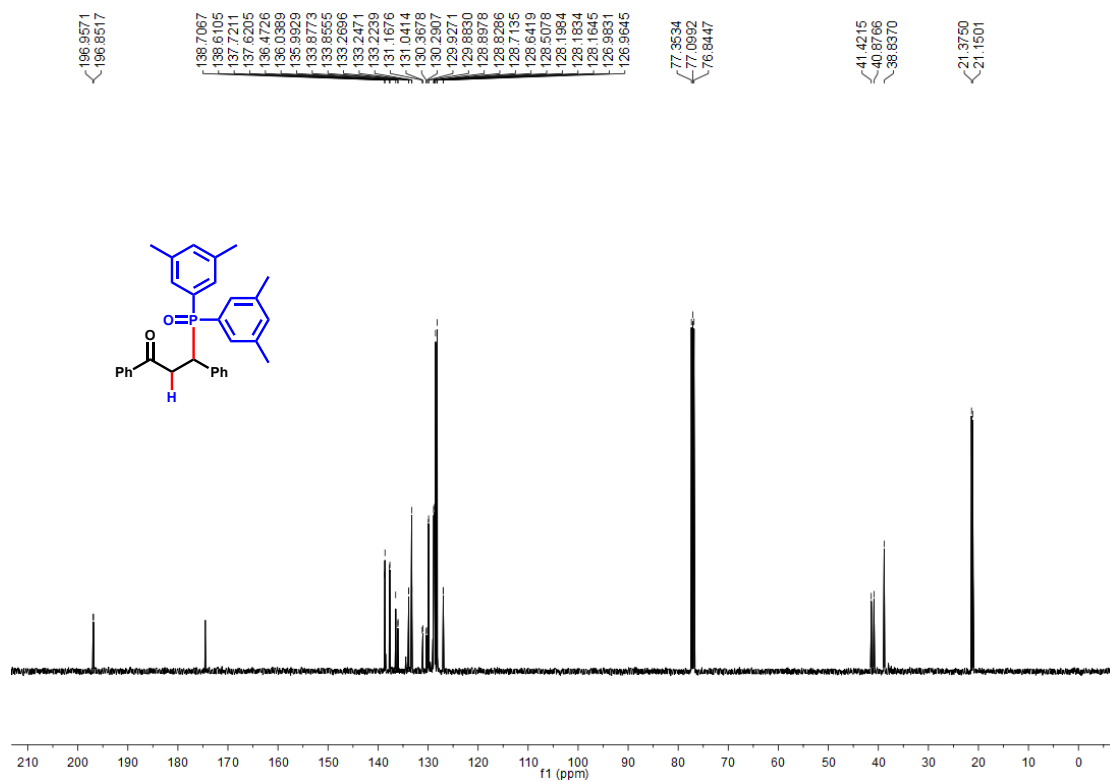

### <sup>31</sup>P NMR

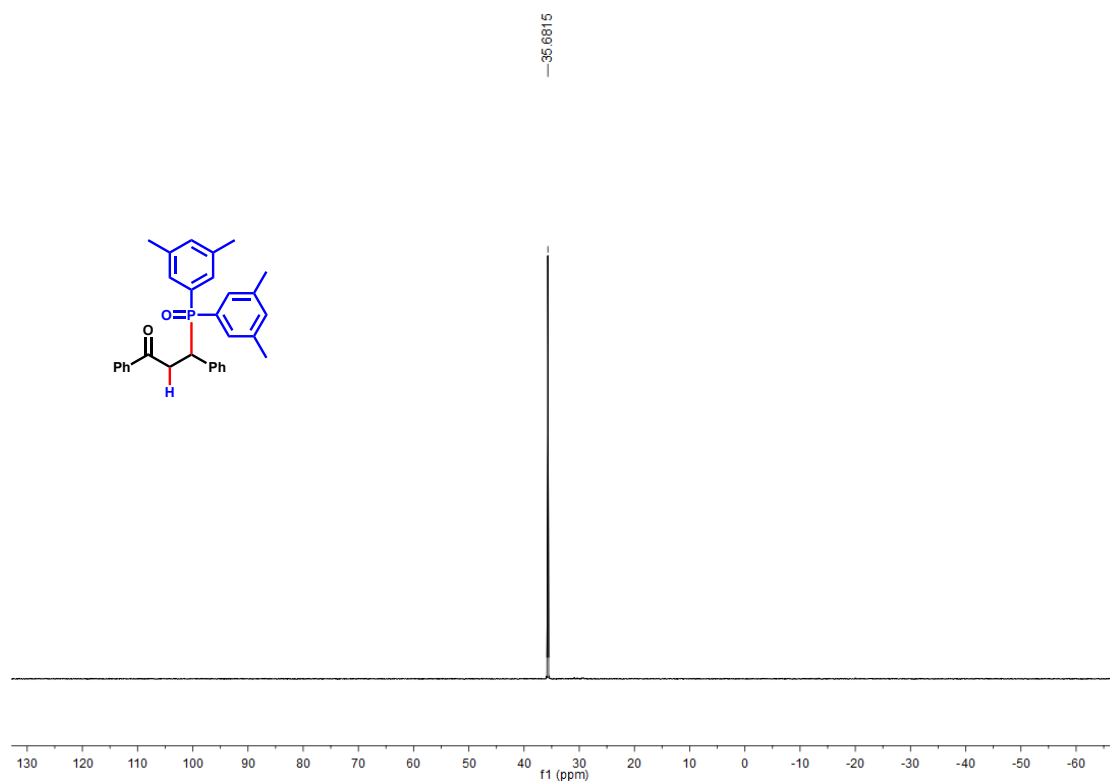



38c

<sup>1</sup>H NMR

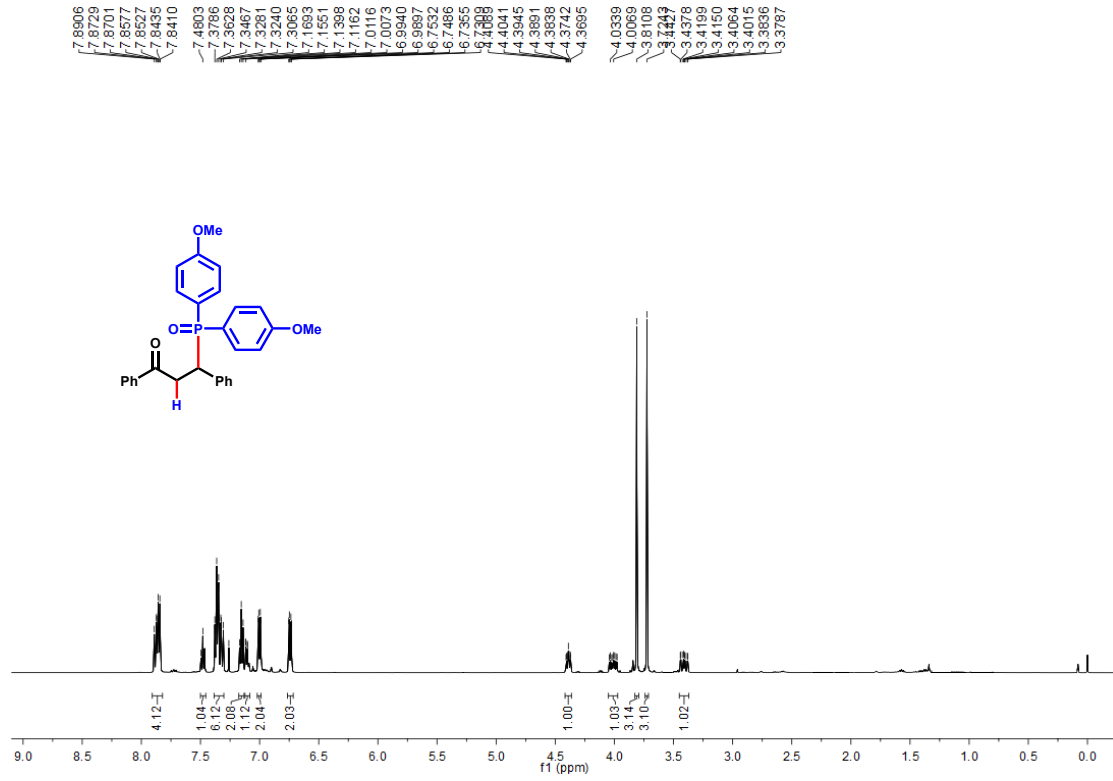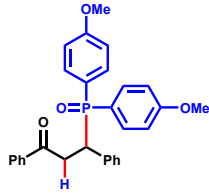

<sup>13</sup>C NMR

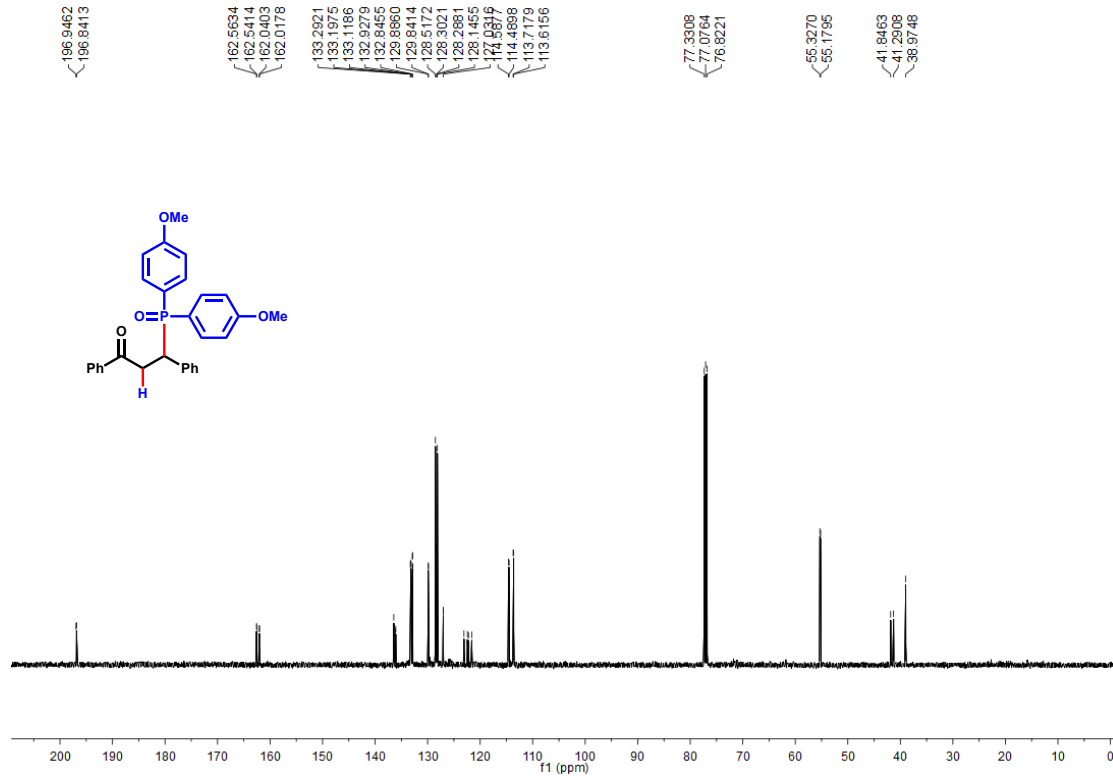

### <sup>31</sup>P NMR

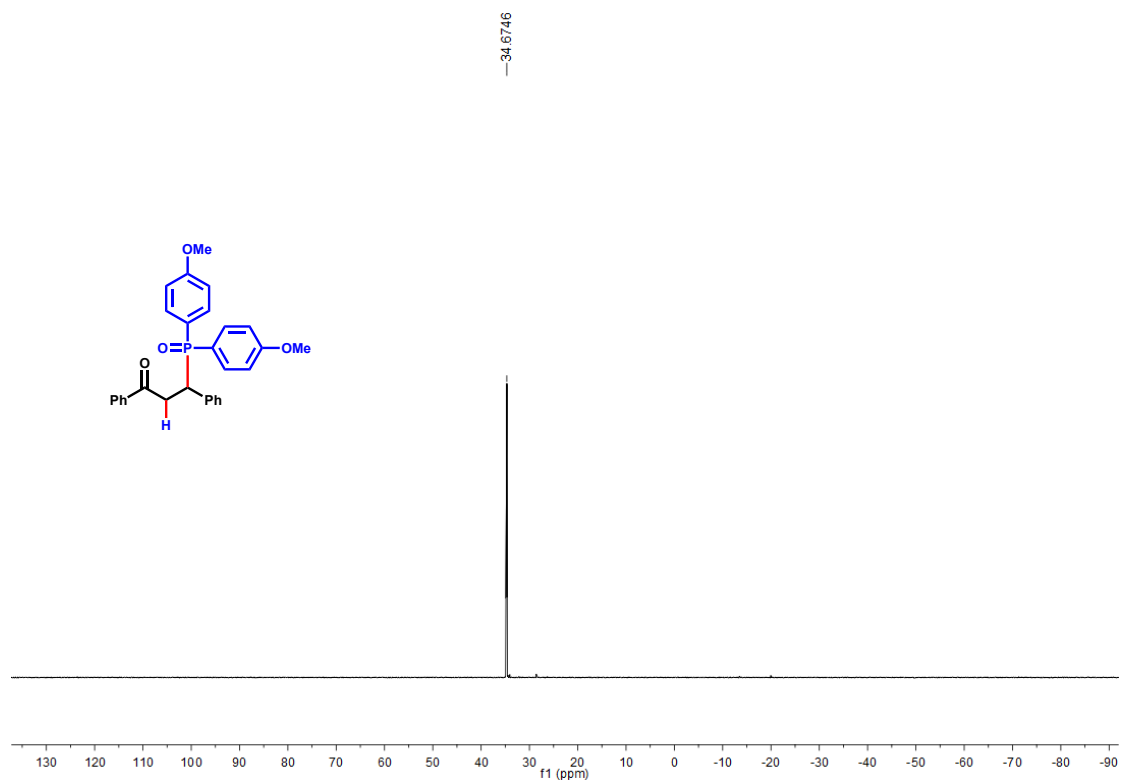

39c

### <sup>1</sup>H NMR

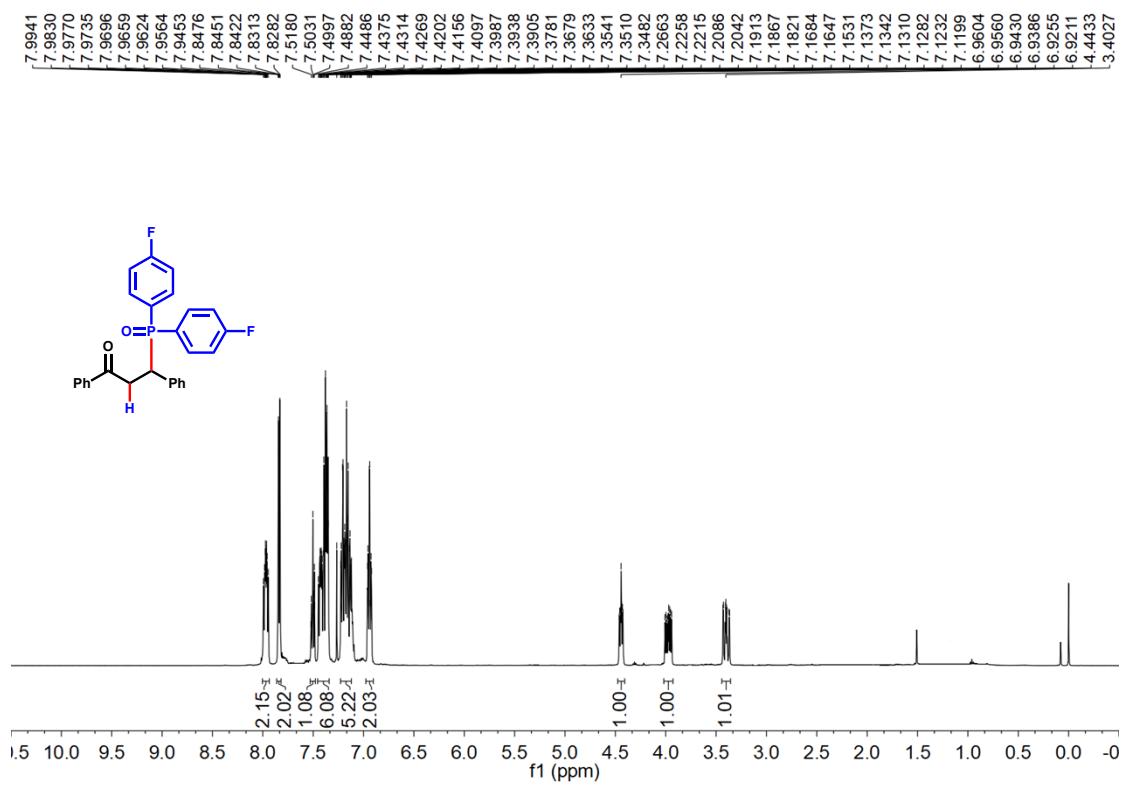

### <sup>13</sup>C NMR

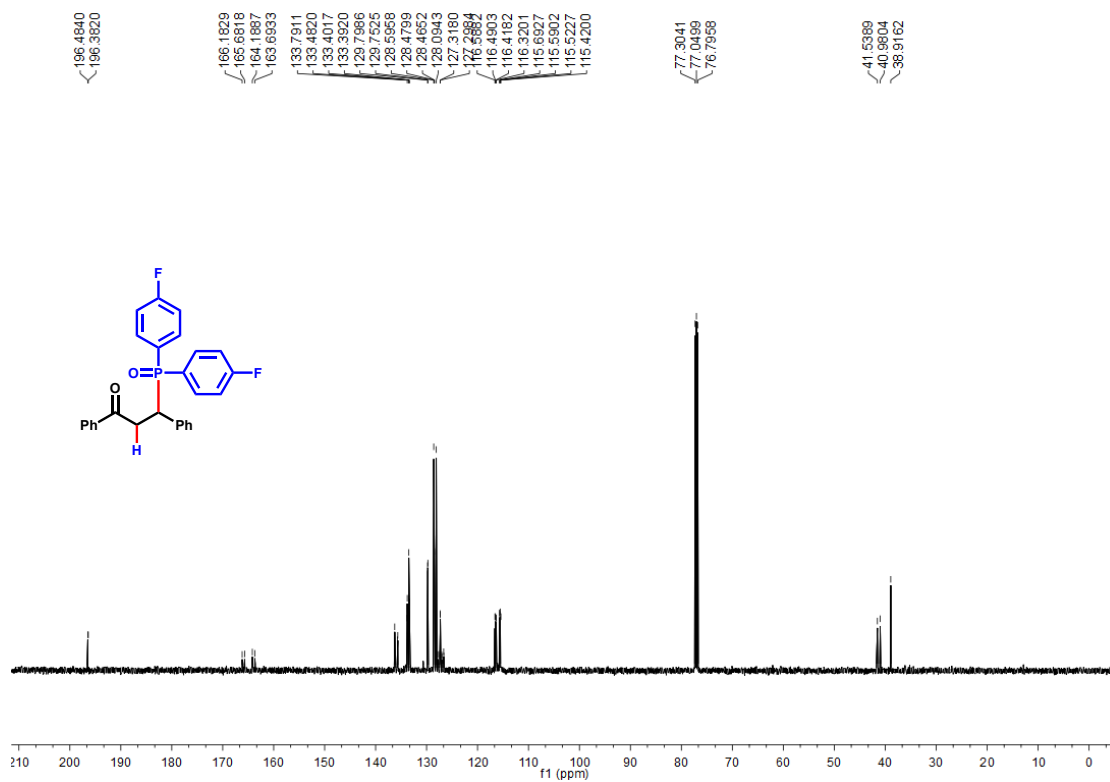

### <sup>19</sup>F NMR

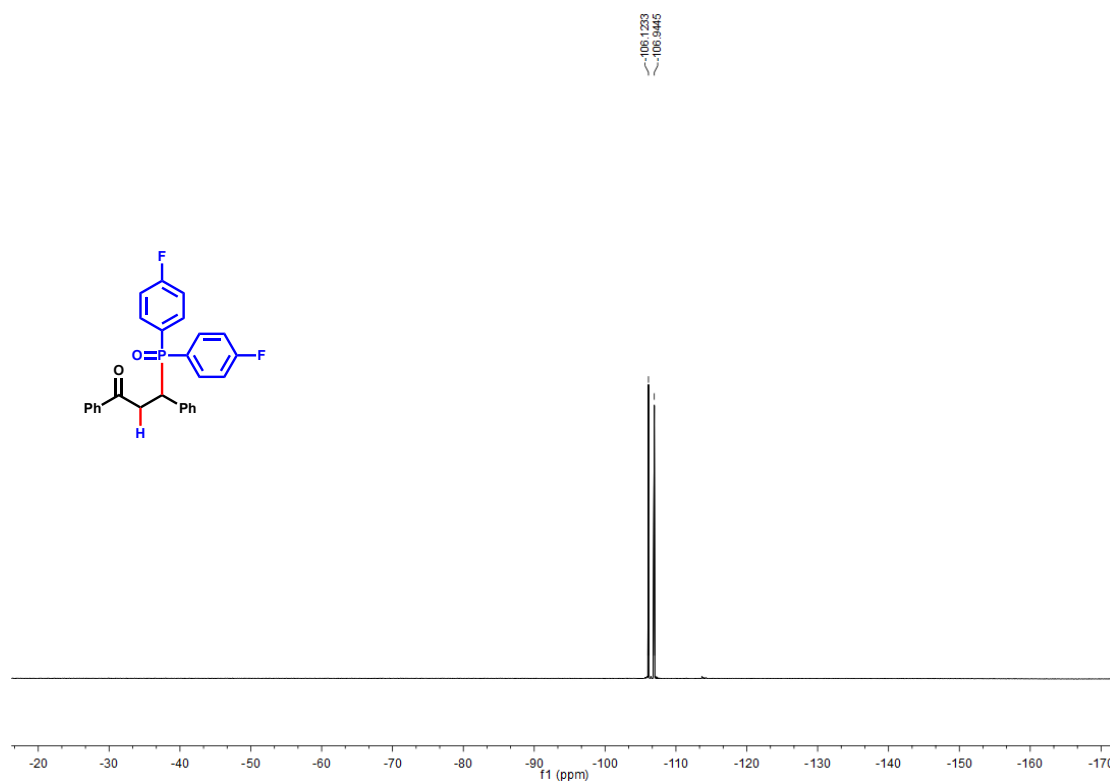

### <sup>31</sup>P NMR

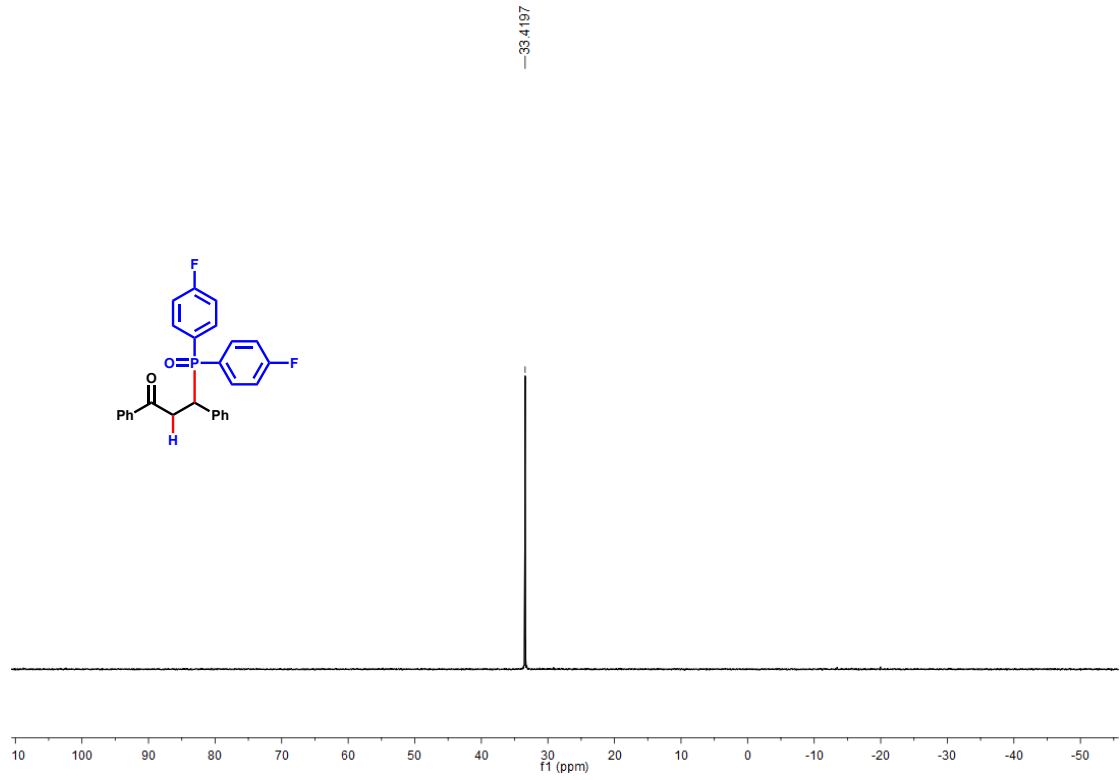

40c

### <sup>1</sup>H NMR

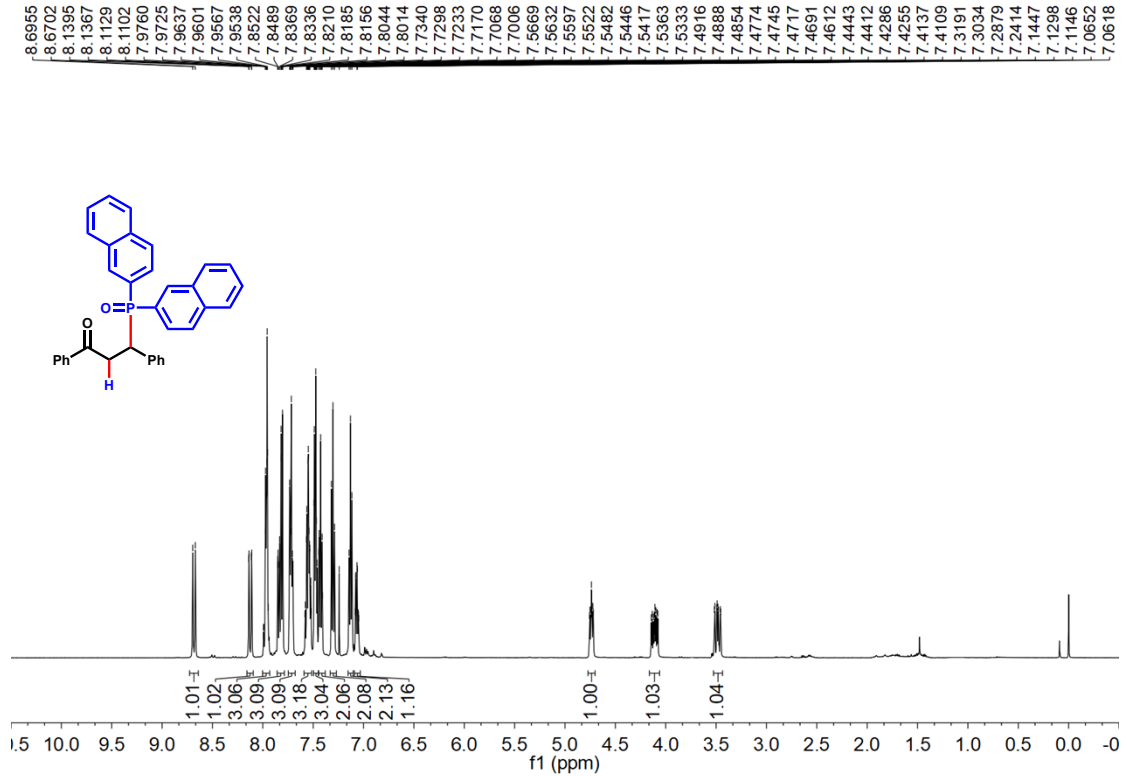

### <sup>13</sup>C NMR

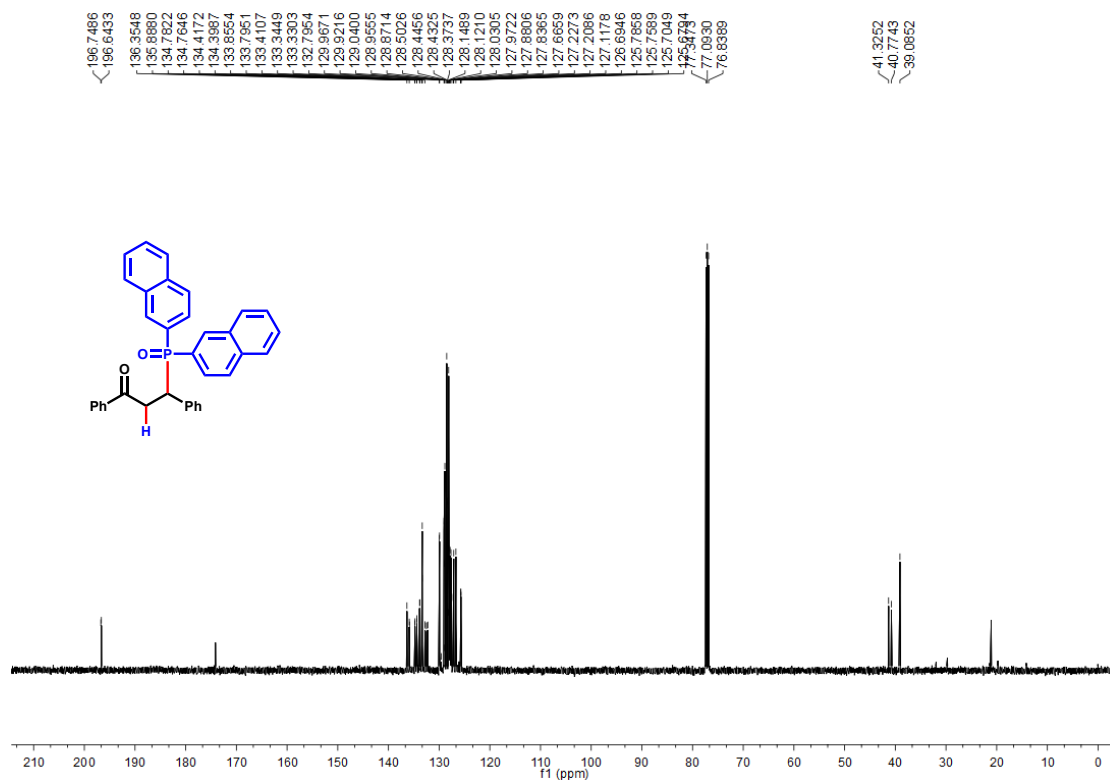

### <sup>31</sup>P NMR

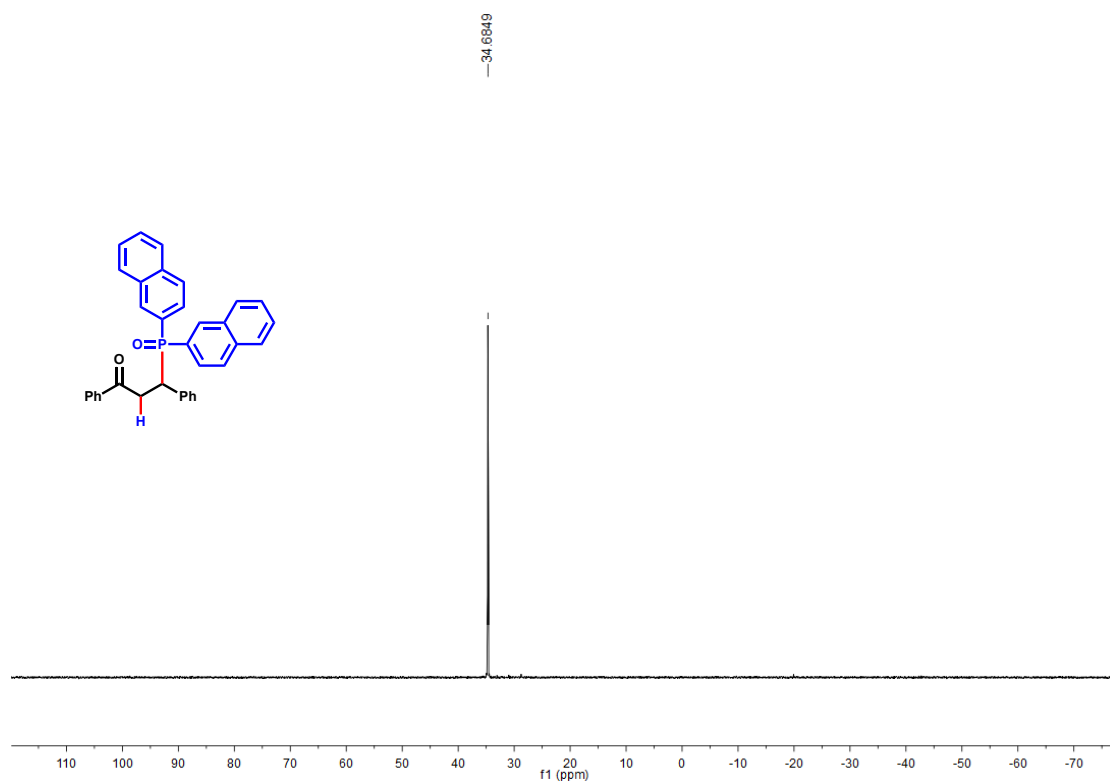

42c

<sup>1</sup>H NMR

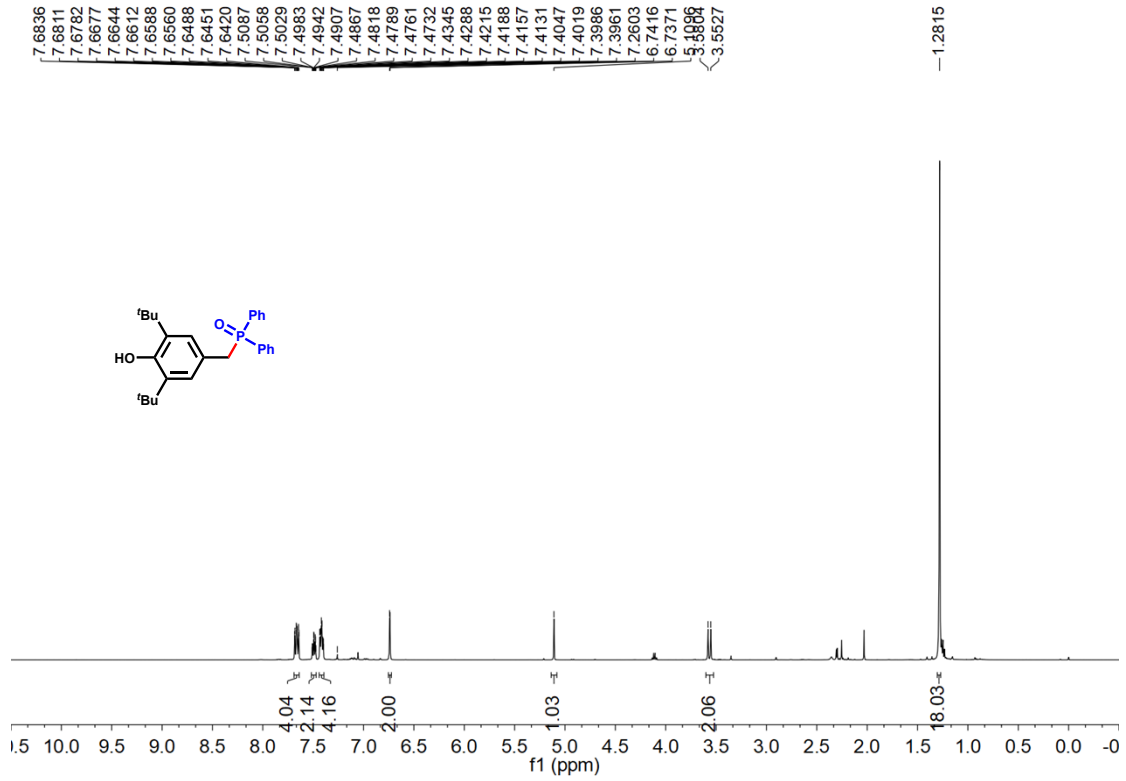

<sup>13</sup>C NMR

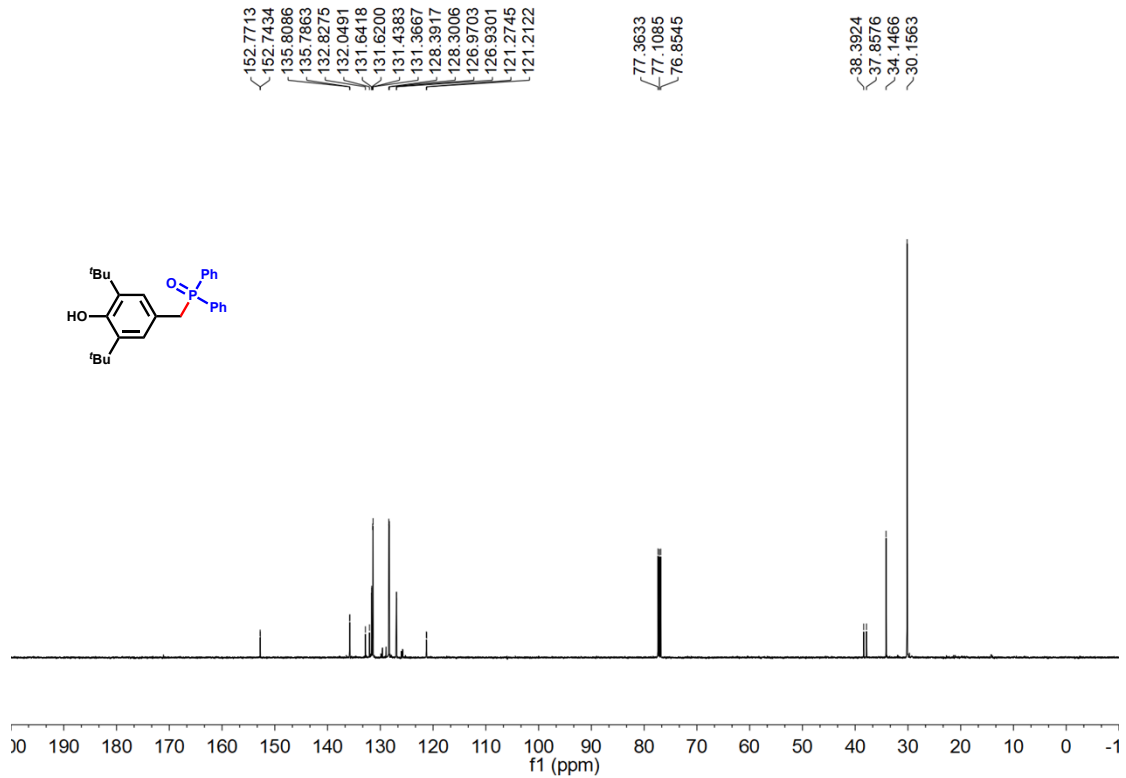

Supplement: d2cc02745c1.pdf [file d2cc02745c1.pdf]
